# Supplementary material for: RAPiD: a rapid and accurate plant pathogen identification pipeline for on-site nanopore sequencing
Source: PeerJ. 2024 Sep 25;12:e17893. doi: 10.7717/peerj.17893 (PMC11438431; doi:10.7717/peerj.17893)
Supplement: Supplemental Information 1 [file peerj-12-17893-s001.xlsx]

## Sheet: Tabelle1
Supplemental Table S1
Species	SRA dataset	In reference database?	Reference genome
Pseudomonas syringae	SRR15647452	yes	GCF_002003545.1
Pseudomonas chlororaphis	SRR16294857	no	N/A
Burkholderia glumae	SRR12132997	yes	GCA_009931375.1
Burkholderia seminalis	SRR14075918	no	N/A
Spiroplasma citri	SRR11536473	yes	GCA_001886855.1
Spiroplasma poulsonii	SRR12065013	no	N/A
Lactobacillus plantarum	SRR13051979	yes	GCA_003269405.1
Lactobacillus futsaii	SRR13051579	no	N/A
Xanthomonas citri	SRR11234625	yes	GCA_000961215.1
Xanthomonas axonopodis	SRR11790538	no	N/A
Clostridium beijerinckii	SRR14666017	yes	GCA_018223745.1
Clostridium botulinum	SRR12395855	no	N/A
Vibrio vulnificus	SRR13453794	yes	GCA_002204915.1
Vibrio cholerae	SRR12699722	no	N/A
Staphylococcus aureus	SRR7179413	yes	GCA_000013425.1
Staphylococcus epidermidis	SRR13745237	no	N/A
Puccinia graminis	ERR4189663	yes	GCA_000149925.1
Puccinia triticana	SRR14386299	no	N/A
Fusarium oxysporum	SRR14237202	yes	GCA_000271745.2
Fusarium circinatum	SRR15608953	no	N/A
Phytophthora infestans	SRR11592935	yes	GCA_000142945.1
Phytophthora sojae	SRR10836974	no	N/A
Bipolaris sorokiniana	SRR9334012	yes	GCA_000338995.1
Bipolaris victoriae	SRR10412887	no	N/A
Colletotrichum echinochloae	SRR12904703	yes	GCA_016618095.1
Colletotrichum scovillei	SRR11060983	no	N/A
Penicillium aurantiogriseum	SRR13616996	yes	GCA_019977855.1
Penicillium sclerotiorum	ERR6348193	no	N/A
