# Supplementary material for: RAPiD: a rapid and accurate plant pathogen identification pipeline for on-site nanopore sequencing
Source: PeerJ. 2024 Sep 25;12:e17893. doi: 10.7717/peerj.17893 (PMC11438431; doi:10.7717/peerj.17893)
Supplement: Supplemental Information 2 [file peerj-12-17893-s002.xlsx]

## Sheet: Tabelle1
Supplemental Table S2:
Plant pathogen for reference database	NCBI taxid
Alternaria alternata	5599
Alternaria solani	48100
Ascochyta rabiei	5454
Ashbya gossypii	33169
Aspergillus ruber	396024
Athelia rolfsii	39291
Berkeleyomyces basicola	124036
Bipolaris maydis	5016
Bipolaris oryzae	101162
Bipolaris sorokiniana	45130
Bipolaris victoriae	40125
Bipolaris zeicola	5017
Blumeria graminis	34373
Botrytis cinerea	40559
Botrytis fabae	182092
Ceraceosorus bombacis	401625
Cercospora beticola	122368
Cercospora kikuchii	84275
Cercospora nicotianae	29003
Cercospora zeae-maydis	135779
Choanephora cucurbitarum	101091
Claviceps purpurea	5111
Colletotrichum acutatum	27357
Colletotrichum fioriniae	710243
Colletotrichum fructicola	690256
Colletotrichum gloeosporioides	474922
Colletotrichum graminicola	31870
Colletotrichum higginsianum	80884
Colletotrichum incanum	1573173
Colletotrichum lindemuthianum	290576
Colletotrichum nymphaeae	306554
Colletotrichum orbiculare	5465
Colletotrichum salicis	1209931
Colletotrichum simmondsii	703756
Colletotrichum sublineola	1173701
Cronartium ribicola	27354
Cryphonectria parasitica	5116
Diaporthe helianthi	158607
Dothistroma septosporum	64363
Epichloe typhina	5113
Erysiphe necator	52586
Eutypa lata	97096
Fusarium culmorum	5516
Fusarium fujikuroi	5127
Fusarium graminearum	5518
Fusarium langsethiae	179993
Fusarium oxysporum	5507
Fusarium poae	36050
Fusarium pseudograminearum	101028
Fusarium solani	169388
Fusarium verticillioides	117187
Fusarium virguliforme	232082
Gaeumannomyces tritici	36779
Geotrichum candidum	1173061
Gloeophyllum trabeum	104355
Golovinomyces cichoracearum	62708
Grosmannia clavigera	226899
Hemileia vastatrix	203904
Heterobasidion annosum	13563
Heterobasidion irregulare	984962
Hymenoscyphus fraxineus	746836
Leptosphaeria maculans	5022
Macrophomina phaseolina	35725
Magnaporthe poae	148304
Marssonina brunnea	698440
Melampsora larici-populina	203908
Melampsora abietis-canadensis	526922
Melampsora aecidioides	526923
Melampsora allii-populina	242475
Melampsora medusae	82101
Melampsora occidentalis	82102
Melampsora pinitorqua	526925
Microbotryum violaceum	5272
Microdochium bolleyi	196109
Mixia osmundae	34349
Monilinia fructicola	38448
Moniliophthora perniciosa	153609
Moniliophthora roreri	221103
Nectria galligena	56674
Neofusicoccum parvum	310453
Neonectria ditissima	78410
Ophiostoma novo-ulmi	42373
Parastagonospora nodorum	13684
Passalora fulva	5499
Penicillium digitatum	36651
Penicillium expansum	27334
Penicillium italicum	40296
Phaeoacremonium minimum	223192
Phanerochaete carnosa	231932
Plasmodiophora brassicae	37360
Polymyxa betae	41456
Pseudocercospora eumusae	321146
Pseudocercospora fijiensis	1873960
Pseudocercospora musae	113226
Puccinia coronata	27344
Puccinia graminis	5297
Puccinia recondita	27348
Puccinia sorghi	27349
Puccinia striiformis	27350
Puccinia triticina	208348
Pyrenophora teres	53485
Pyrenophora tritici‐repentis	45151
Pyricularia oryzae	318829
Ramularia collo‐cygni	112498
Rhizoctonia solani	456999
Rhynchosporium commune	914237
Rosellinia necatrix	77044
Sclerotinia borealis	77105
Sclerotinia sclerotiorum	5180
Sclerotium cepivorum	38492
Setosphaeria turcica	93612
Sphaerulina musiva	85929
Sporisorium reilianum	72558
Sporisorium scitamineum	49012
Stemphylium lycopersici	183478
Stereum hirsutum	40492
Taphrina deformans	5011
Thielaviopsis punctulata	72032
Tilletia caries	13290
Tilletia indica	43049
Trametes cinnabarina	5643
Uromyces viciae-fabae	55588
Ustilaginoidea virens	1159556
Ustilago hordei	120017
Ustilago maydis	5270
Venturia inaequalis	5025
Verticillium albo‐atrum	27335
Verticillium alfalfae	1051613
Verticillium dahliae	27337
Verticillium longisporum	100787
Zymoseptoria brevis	1047168
Zymoseptoria tritici	1047171
Albugo candida	65357
Albugo laibachii	653948
Bremia lactucae	4779
Globisporangium ultimum	2052682
Hyaloperonospora arabidopsidis	272952
Phytophthora cactorum	29920
Phytophthora capsici	4784
Phytophthora cinnamomi	4785
Phytophthora infestans	4787
Phytophthora kernoviae	325452
Phytophthora lateralis	129355
Phytophthora parasitica	4792
Phytophthora ramorum	164328
Phytophthora sojae	67593
Plasmopara viticola	143451
Pseudoperonospora cubensis	143453
Pseudoperonospora humuli	162120
Pythium aphanidermatum	65070
Pythium arrhenomanes	82932
Pythium irregulare	36331
Pythium vexans	907947
Agrobacterium rhizogenes	359
Agrobacterium tumefaciens	358
Agrobacterium vitis	373
Burkholderia glumae	337
Candidatus Liberibacter asiaticus	34021
Candidatus Phytoplasma palmae	85624
Dickeya dianthicola	204039
Dickeya solani	1089444
Dickeya dadantii	204038
Erwinia amylovora	552
Erwinia chrysanthemi	556
Erwinia tracheiphila	65700
Pantoea stewartii	66269
Pectobacterium aroidearum	1201031
Pectobacterium atrosepticum	29471
Pectobacterium carotovorum	554
Pseudomonas cannabina	86840
Pseudomonas savastanoi	29438
Pseudomonas syringae	317
Pseudomonas syringae pv. tabaci	322
Pseudomonas syringae pv. actinidiae	103796
Pseudomonas syringae pv. phaseolicola	319
Pseudomonas syringae pv. tomato	323
Ralstonia solanacearum	305
Spiroplasma citri	2133
Spiroplasma kunkelii	47834
Streptomyces scabiei	1930
Xanthomonas axonopodis	53413
Xanthomonas campestris	339
Xanthomonas citri	346
Xanthomonas euvesicatoria	456327
Xanthomonas hortorum	56454
Xanthomonas oryzae	347
Xanthomonas perforans	442694
Xanthomonas phaseoli	1985254
Xanthomonas arboricola	56448
Xylella fastidiosa	2371
