# Supplementary material for: RAPiD: a rapid and accurate plant pathogen identification pipeline for on-site nanopore sequencing
Source: PeerJ. 2024 Sep 25;12:e17893. doi: 10.7717/peerj.17893 (PMC11438431; doi:10.7717/peerj.17893)
Supplement: Supplemental Information 3 [file peerj-12-17893-s003.xlsx]

## Sheet: Tabelle1
Supplemental Table S3:
Sequences removed from reference database	Reason for removal
CM033789.1	mitochondrial
DS231662.1	mitochondrial
KT283062.1	mitochondrial
CP072760.1	mitochondrial
DS572747.1	mitochondrial
FJUW01000164.1	mitochondrial
CM001021.1	mitochondrial
DS178456.1	mitochondrial
AAIM02000211.1	mitochondrial
DS985240.1	mitochondrial
CM001644.1	mitochondrial
AAIM02000212.1	mitochondrial
CP064751.1	mitochondrial
AE016821.1	mitochondrial
DS572748.1	mitochondrial
KI964214.1	mitochondrial
GL385908.1	mitochondrial
DS028504.1	mitochondrial
AHJF01000547.1	mitochondrial
AAIM02000213.1	mitochondrial
KI964241.1	mitochondrial
KQ040502.1	mitochondrial
MCBS01025078.1	mitochondrial
QQZM01000117.1	mitochondrial
MASP02000910.1	mitochondrial
AMZP02002806.1	mitochondrial
LWEC01000623.1	mitochondrial
MCBS01024360.1	mitochondrial
KI964272.1	mitochondrial
JAHHPK010000143.1	mitochondrial
MASP02000800.1	mitochondrial
DS572749.1	mitochondrial
MCBS01024727.1	mitochondrial
KI964280.1	mitochondrial
MCBS01024109.1	mitochondrial
ADOS01001361.1	mitochondrial
ADOS01001418.1	mitochondrial
MCBS01024936.1	mitochondrial
KI964298.1	mitochondrial
MASP02000855.1	mitochondrial
ADOS01001393.1	mitochondrial
GG688768.1	mitochondrial
KQ040501.1	mitochondrial
MCBS01022697.1	mitochondrial
ADOS01001557.1	mitochondrial
KI965021.1	mitochondrial
MCBS01025062.1	mitochondrial
KI964341.1	mitochondrial
CH445393.1	mitochondrial
ADOS01001552.1	mitochondrial
NMXJ01000013.1	mitochondrial
ADOS01001550.1	mitochondrial
ADOS01001400.1	mitochondrial
KI964360.1	mitochondrial
KB446600.1	mitochondrial
KB446601.1	mitochondrial
MCBS01024924.1	mitochondrial
AMZP02002922.1	mitochondrial
KK088497.1	mitochondrial
AHJF01003328.1	mitochondrial
ADOS01001372.1	mitochondrial
KI964367.1	mitochondrial
ADOS01001435.1	mitochondrial
KI964368.1	mitochondrial
ADOS01001398.1	mitochondrial
KB446604.1	mitochondrial
JAJHJD010000043.1	mitochondrial
KI964372.1	mitochondrial
ADOS01001399.1	mitochondrial
ADOS01001377.1	mitochondrial
MCBS01025059.1	mitochondrial
MCBS01019784.1	mitochondrial
PHNK01063127.1	mitochondrial
KK088499.1	mitochondrial
ADOS01001430.1	mitochondrial
MCBS01024085.1	mitochondrial
CACSLJ010000758.1	mitochondrial
MASP02000893.1	mitochondrial
LT855432.1	mitochondrial
ADOS01001436.1	mitochondrial
MCBS01022789.1	mitochondrial
ADOS01001385.1	mitochondrial
ADOS01001195.1	mitochondrial
CACSLJ010000881.1	mitochondrial
ADOS01001374.1	mitochondrial
KI964381.1	mitochondrial
PGCI01000566.1	mitochondrial
ADOS01001412.1	mitochondrial
AMZP02005280.1	mitochondrial
ADOS01001214.1	mitochondrial
ADOS01001554.1	mitochondrial
ADOS01001384.1	mitochondrial
CACSLJ010000857.1	mitochondrial
AMZP02007966.1	mitochondrial
CACSLJ010000921.1	mitochondrial
CACSLJ010000922.1	mitochondrial
KI964393.1	mitochondrial
ADOS01001413.1	mitochondrial
PHNK01102440.1	mitochondrial
ADOS01001197.1	mitochondrial
KI964392.1	mitochondrial
ADOS01001386.1	mitochondrial
ADOS01001379.1	mitochondrial
KI965169.1	mitochondrial
GG690901.1	mitochondrial
QLOC01000040.1	mitochondrial
CAJNAR010000198.1	mitochondrial
ADOS01001210.1	mitochondrial
KK088494.1	mitochondrial
PHNK01075532.1	mitochondrial
MCBS01024231.1	mitochondrial
VKKV01000522.1	mitochondrial
AHJF01005719.1	mitochondrial
ADOS01001395.1	mitochondrial
KI964396.1	mitochondrial
KI964402.1	mitochondrial
KI964408.1	mitochondrial
ADOS01001411.1	mitochondrial
CH959348.1	mitochondrial
KI964406.1	mitochondrial
KI965205.1	mitochondrial
GG689551.1	mitochondrial
KI670134.1	mitochondrial
MCBS01016175.1	mitochondrial
ADOS01001196.1	mitochondrial
KI964410.1	mitochondrial
AMZP02001892.1	mitochondrial
ADOS01001194.1	mitochondrial
CACSLJ010000981.1	mitochondrial
CACSLJ010000979.1	mitochondrial
CACSLJ010000692.1	mitochondrial
ADOS01001205.1	mitochondrial
KI965211.1	mitochondrial
ADOS01001198.1	mitochondrial
CACSLJ010000957.1	mitochondrial
CH959362.1	mitochondrial
KI964415.1	mitochondrial
CACSLJ010000965.1	mitochondrial
JACVFG010000456.1	mitochondrial
VKKV01000019.1	mitochondrial
CACSLJ010000654.1	mitochondrial
PHNK01107063.1	mitochondrial
ADOS01001439.1	mitochondrial
KI670153.1	mitochondrial
PHNK01028921.1	mitochondrial
ADOS01001437.1	mitochondrial
DS231675.1	mitochondrial
LWEC01000616.1	mitochondrial
JAHHPK010000107.1	mitochondrial
CACSLJ010000892.1	mitochondrial
AMZP02003665.1	mitochondrial
CACSLJ010000840.1	mitochondrial
MCBS01025073.1	mitochondrial
DS231694.1	mitochondrial
GL385909.1	mitochondrial
GL385911.1	mitochondrial
VKKV01000523.1	mitochondrial
VKKV01000026.1	mitochondrial
VKKV01000146.1	mitochondrial
VKKV01000401.1	mitochondrial
KI965129.1	mitochondrial
GG689157.1	mitochondrial
VKKV01000261.1	mitochondrial
VKKV01000418.1	mitochondrial
CACSLJ010000827.1	mitochondrial
LWEC01000618.1	mitochondrial
KI965143.1	mitochondrial
CACSLJ010001010.1	mitochondrial
LT855442.1	mitochondrial
CACSLJ010000920.1	mitochondrial
LFZN01000595.1	mitochondrial
CACSLJ010000993.1	mitochondrial
CACSLJ010000938.1	mitochondrial
LFZO01001973.1	mitochondrial
CP064752.1	mitochondrial
CACSLJ010000960.1	mitochondrial
KE733962.1	mitochondrial
CACSLJ010000624.1	mitochondrial
CACSLJ010000916.1	mitochondrial
KI965032.1	mitochondrial
MCBS01021003.1	mitochondrial
ADOS01001417.1	mitochondrial
JAKULF010000023.1	mitochondrial
ML993011.1	mitochondrial
JAHHPK010000048.1	mitochondrial
PHNK01001419.1	mitochondrial
AMZP02003993.1	mitochondrial
KI965124.1	mitochondrial
JACVFG010000769.1	mitochondrial
CACSLJ010000911.1	mitochondrial
ULHA01000027.1	mitochondrial
KE734157.1	mitochondrial
ADOS01001428.1	mitochondrial
CACSLJ010000567.1	mitochondrial
CACSLJ010000790.1	mitochondrial
MCBS01021724.1	mitochondrial
LT855431.1	mitochondrial
VKKV01000262.1	mitochondrial
MU032365.1	mitochondrial
GL385910.1	mitochondrial
AMZP02006427.1	mitochondrial
CP010939.1	mitochondrial
KI965112.1	mitochondrial
KI965012.1	mitochondrial
LNQT01000473.1	mitochondrial
AWVX01005396.1	mitochondrial
PHNK01041688.1	mitochondrial
KI965062.1	mitochondrial
LNQT01003589.1	mitochondrial
JACVFG010000633.1	mitochondrial
KI965034.1	mitochondrial
LNQT01002948.1	mitochondrial
AMZP02006480.1	mitochondrial
PHNK01087390.1	mitochondrial
LFZN01000460.1	mitochondrial
CACSLJ010000671.1	mitochondrial
CACSLJ010000560.1	mitochondrial
JAKULF010000026.1	mitochondrial
JAKULF010000022.1	mitochondrial
KB733582.1	mitochondrial
LFZO01001073.1	mitochondrial
LFIW01001426.1	mitochondrial
KE729868.1	mitochondrial
CACSLJ010000835.1	mitochondrial
ADOS01001440.1	mitochondrial
CACSLJ010000901.1	mitochondrial
CACSLJ010000774.1	mitochondrial
LFIW01001619.1	mitochondrial
AMZP02003673.1	mitochondrial
AWVX01024338.1	mitochondrial
AWVX01026855.1	mitochondrial
AWVX01027829.1	mitochondrial
MCBS01025075.1	mitochondrial
MASP02000294.1	mitochondrial
DS231695.1	mitochondrial
DS028637.1	mitochondrial
LNQT01002965.1	mitochondrial
LT855441.1	mitochondrial
CP064811.1	mitochondrial
AMCV02000113.1	mitochondrial
KI965051.1	mitochondrial
GG689759.1	mitochondrial
VKKV01000385.1	mitochondrial
ABWE02005235.1	mitochondrial
VKKV01000092.1	mitochondrial
GG690443.1	mitochondrial
KZ120450.1	mitochondrial
CACSLJ010000926.1	mitochondrial
GG689665.1	mitochondrial
CACSLJ010000939.1	mitochondrial
MWRH01006130.1	mitochondrial
LNQT01002861.1	mitochondrial
LT855435.1	mitochondrial
MWRH01006775.1	mitochondrial
KI578048.1	mitochondrial
SHOA02000145.1	mitochondrial
UTTT01000028.1	mitochondrial
LNQT01003525.1	mitochondrial
LT855452.1	mitochondrial
KE731683.1	mitochondrial
QGEC01000081.1	mitochondrial
MWRL01007179.1	mitochondrial
DS028959.1	mitochondrial
FP929071.1	mitochondrial
KE732324.1	mitochondrial
ML992906.1	mitochondrial
ADOS01001376.1	mitochondrial
KE464644.1	mitochondrial
LKMD01000085.1	mitochondrial
AMZP02005449.1	mitochondrial
LNQT01002001.1	mitochondrial
LNQT01003024.1	mitochondrial
JAFFKB010000059.1	mitochondrial
CACSLJ010000990.1	mitochondrial
FJOF01000022.1	mitochondrial
DS572729.1	mitochondrial
DS028680.1	mitochondrial
KK088496.1	mitochondrial
DS028320.1	mitochondrial
PVPY01000050.1	mitochondrial
DS028376.1	mitochondrial
KE733457.1	mitochondrial
GL883501.1	mitochondrial
KI965196.1	mitochondrial
LNQT01002490.1	mitochondrial
CACSLJ010000906.1	mitochondrial
LNQT01003016.1	mitochondrial
KE731379.1	mitochondrial
GG690130.1	mitochondrial
DS028820.1	mitochondrial
ML993032.1	mitochondrial
KZ148832.1	mitochondrial
KE734619.1	mitochondrial
ADOS01001433.1	mitochondrial
ADOS01001420.1	mitochondrial
JACVFG010000435.1	mitochondrial
LNQT01001434.1	mitochondrial
LFZN01000698.1	mitochondrial
ADOS01001388.1	mitochondrial
GG690675.1	mitochondrial
PJAC01000063.1	mitochondrial
LT855436.1	mitochondrial
MWRL01007575.1	mitochondrial
LT855437.1	mitochondrial
JAJHJD010000028.1	mitochondrial
LT855456.1	mitochondrial
DS028698.1	mitochondrial
CACSLJ010000853.1	mitochondrial
GG689039.1	mitochondrial
ULHA01000025.1	mitochondrial
LT855444.1	mitochondrial
KI965030.1	mitochondrial
ML993549.1	mitochondrial
KI577197.1	mitochondrial
GG690421.1	mitochondrial
JNCO01025851.1	mitochondrial
JNCO01046085.1	mitochondrial
LNQT01002916.1	mitochondrial
CM001753.1	mitochondrial
GG690697.1	mitochondrial
KE731698.1	mitochondrial
CACSLJ010001006.1	mitochondrial
JAKULF010000025.1	mitochondrial
JACVFG010000326.1	mitochondrial
KZ149343.1	mitochondrial
DS178421.1	mitochondrial
LNQT01002860.1	mitochondrial
LFZN01001324.1	mitochondrial
LT855434.1	mitochondrial
QWWT01000047.1	mitochondrial
ML993022.1	mitochondrial
LFIW01000640.1	mitochondrial
KE727944.1	mitochondrial
DS029006.1	mitochondrial
KI964993.1	mitochondrial
CACSLJ010001003.1	mitochondrial
CACSLJ010000828.1	mitochondrial
GG689937.1	mitochondrial
ULHA01000020.1	mitochondrial
GG689513.1	mitochondrial
JAFBAW010000040.1	mitochondrial
PHNK01030992.1	mitochondrial
LFZO01000356.1	mitochondrial
JAGYVD010000012.1	mitochondrial
GG690424.1	mitochondrial
KE729066.1	mitochondrial
AWVX01038729.1	mitochondrial
LT855433.1	mitochondrial
VKKV01000404.1	mitochondrial
DS028516.1	mitochondrial
KE464648.1	mitochondrial
LAEV01001048.1	mitochondrial
JNCO01034963.1	mitochondrial
GG689957.1	mitochondrial
KE733732.1	mitochondrial
LFZO01003155.1	mitochondrial
MWRL01014438.1	mitochondrial
JAFFKB010000017.1	mitochondrial
DS028583.1	mitochondrial
JAFBAW010000016.1	mitochondrial
JAKMXP010000011.1	mitochondrial
MU032366.1	mitochondrial
AWVX01026486.1	mitochondrial
AWVX01013688.1	mitochondrial
LNQT01002949.1	mitochondrial
QGDZ01000034.1	mitochondrial
KE732680.1	mitochondrial
JACVFG010000788.1	mitochondrial
AWVX01056149.1	mitochondrial
CAJNAR010000134.1	mitochondrial
GL877171.1	mitochondrial
JAFBAW010000036.1	mitochondrial
DS028438.1	mitochondrial
KB446580.1	mitochondrial
KE734331.1	mitochondrial
ABWE02002965.1	mitochondrial
LFZO01002668.1	mitochondrial
QGEC01000028.1	mitochondrial
FP929115.1	mitochondrial
DS028852.1	mitochondrial
KE734605.1	mitochondrial
KB933165.1	mitochondrial
AMZP02001345.1	mitochondrial
JACVFG010000957.1	mitochondrial
MCBS01017960.1	mitochondrial
ML992872.1	mitochondrial
KK088500.1	mitochondrial
MCBS01025077.1	mitochondrial
KE723804.1	mitochondrial
CAJNAR010000140.1	mitochondrial
JAFLQL010000057.1	mitochondrial
JACVFG010000776.1	mitochondrial
JAFBAW010000021.1	mitochondrial
MCBS01024972.1	mitochondrial
LFZN01000734.1	mitochondrial
JH598050.1	mitochondrial
PGCI01000832.1	mitochondrial
PGCI01000342.1	mitochondrial
GG688872.1	mitochondrial
AMZP02006236.1	mitochondrial
LT855445.1	mitochondrial
CCYA01000484.1	mitochondrial
LFZO01001858.1	mitochondrial
GL883187.1	mitochondrial
GG689860.1	mitochondrial
CAJHIT010000023.1	mitochondrial
SSNE01000113.1	mitochondrial
JAJIWN010000021.1	mitochondrial
JACVFG010000889.1	mitochondrial
JH921490.1	mitochondrial
POSS01000177.1	mitochondrial
ML992803.1	mitochondrial
KB908781.1	mitochondrial
GL883275.1	mitochondrial
KB469321.1	mitochondrial
QWWT01000041.1	mitochondrial
GL883205.1	mitochondrial
KE730879.1	mitochondrial
LFZN01000612.1	mitochondrial
JAFLQL010000235.1	mitochondrial
JAEQDS010000056.1	mitochondrial
KI965184.1	mitochondrial
QGDG01000311.1	mitochondrial
JAEQDS010000057.1	mitochondrial
ULHA01000016.1	mitochondrial
RHGG01000031.1	mitochondrial
GG690494.1	mitochondrial
ADOS01001423.1	mitochondrial
RYYQ01000032.1	mitochondrial
AMCY02000020.1	mitochondrial
PHNK01028196.1	mitochondrial
LTAN01000023.1	mitochondrial
DS572737.1	mitochondrial
RYYQ01000029.1	mitochondrial
JAFLQL010000033.1	mitochondrial
DS028389.1	mitochondrial
AMCV02000110.1	mitochondrial
LWEC01000620.1	mitochondrial
JAHHPK010000245.1	mitochondrial
LTAN01000021.1	mitochondrial
LTAN01000018.1	mitochondrial
LTAN01000017.1	mitochondrial
LTAN01000014.1	mitochondrial
JAHSQG010000066.1	mitochondrial
JAHSQG010000051.1	mitochondrial
LTAN01000013.1	mitochondrial
JAHSQG010000060.1	mitochondrial
JAHHPK010000150.1	mitochondrial
JAHSQG010000048.1	mitochondrial
JAHSQG010000044.1	mitochondrial
MBPM02000164.1	mitochondrial
QKXC01000042.1	mitochondrial
QGDZ01000070.1	mitochondrial
QGEC01000048.1	mitochondrial
LTAN01000025.1	mitochondrial
JAHHPK010000269.1	mitochondrial
JAHHPK010000199.1	mitochondrial
JAHHPK010000278.1	mitochondrial
JAHHPK010000218.1	mitochondrial
JAHHPK010000219.1	mitochondrial
JAHHPK010000194.1	mitochondrial
JAHHPK010000167.1	mitochondrial
JAHHPK010000262.1	mitochondrial
JAHHPK010000273.1	mitochondrial
JAHHPK010000178.1	mitochondrial
JAHHPK010000257.1	mitochondrial
JAHHPK010000211.1	mitochondrial
JAHHPK010000277.1	mitochondrial
JAHHPK010000183.1	mitochondrial
JAHHPK010000260.1	mitochondrial
JAHHPK010000239.1	mitochondrial
JAHHPK010000207.1	mitochondrial
JAHHPK010000232.1	mitochondrial
JAHHPK010000220.1	mitochondrial
JAHHPK010000279.1	mitochondrial
JAHHPK010000205.1	mitochondrial
JAHHPK010000275.1	mitochondrial
JAHHPK010000195.1	mitochondrial
JAHHPK010000229.1	mitochondrial
JAHHPK010000149.1	mitochondrial
JAHHPK010000236.1	mitochondrial
JAHHPK010000180.1	mitochondrial
JAHHPK010000163.1	mitochondrial
JAHHPK010000179.1	mitochondrial
JAHHPK010000268.1	mitochondrial
JAHHPK010000198.1	mitochondrial
JAHHPK010000158.1	mitochondrial
JAHHPK010000153.1	mitochondrial
JAHHPK010000159.1	mitochondrial
DS231692.1	mitochondrial
GG691092.1	mitochondrial
DS231685.1	mitochondrial
DS231687.1	mitochondrial
DS231683.1	mitochondrial
DS231680.1	mitochondrial
CH445386.1	mitochondrial
JAFLQL010000111.1	mitochondrial
JAHHPK010000157.1	mitochondrial
PHNK01059630.1	mitochondrial
PHNK01086460.1	mitochondrial
CAJHIT010000026.1	mitochondrial
LNQT01003237.1	mitochondrial
LNQT01003352.1	mitochondrial
PHNK01008953.1	mitochondrial
MAPW01000327.1	mitochondrial
MAPW01000312.1	mitochondrial
JH930495.1	mitochondrial
PHNK01085926.1	mitochondrial
JAHHPK010000271.1	mitochondrial
DS028431.1	mitochondrial
POCA01000043.1	mitochondrial
JAFLQL010000293.1	mitochondrial
CAJHIT010000025.1	mitochondrial
CAJHIT010000028.1	mitochondrial
GL883190.1	mitochondrial
LATX01001396.1	mitochondrial
ABRE01017991.1	mitochondrial
CAJHIT010000022.1	mitochondrial
CAJHIT010000020.1	mitochondrial
CAJHIT010000019.1	mitochondrial
JH687424.1	mitochondrial
LNQT01001257.1	mitochondrial
VICG01000020.1	mitochondrial
DS267914.1	mitochondrial
JAFBAW010000071.1	mitochondrial
DS028363.1	mitochondrial
MWRH01008245.1	mitochondrial
CAGA01000149.1	mitochondrial
CP010935.1	mitochondrial
CACSLJ010000991.1	mitochondrial
JABSTD010000275.1	mitochondrial
KB456278.1	mitochondrial
LDPL01000039.1	mitochondrial
JAJHJD010000037.1	mitochondrial
KB445662.1	mitochondrial
AMZP02003288.1	mitochondrial
RYYQ01000034.1	mitochondrial
JAFBAW010000051.1	mitochondrial
DS028546.1	mitochondrial
NHQK01000138.1	mitochondrial
AMCY02000018.1	mitochondrial
AMCV02000100.1	mitochondrial
LNQT01001521.1	mitochondrial
LFIW01000531.1	mitochondrial
KN364177.1	mitochondrial
LNQT01003594.1	mitochondrial
ADOS01001233.1	mitochondrial
MASP02000184.1	mitochondrial
AMCV02000085.1	mitochondrial
LTAN01000024.1	mitochondrial
LTAN01000022.1	mitochondrial
LTAN01000020.1	mitochondrial
LTAN01000019.1	mitochondrial
LTAN01000015.1	mitochondrial
JAHSQG010000055.1	mitochondrial
MBPM02000295.1	mitochondrial
JAHHPK010000156.1	mitochondrial
JAHSQG010000046.1	mitochondrial
JAHSQG010000062.1	mitochondrial
JAHSQG010000064.1	mitochondrial
LAVV01006726.1	mitochondrial
JAHSQG010000056.1	mitochondrial
JAHSQG010000059.1	mitochondrial
MAPW01000073.1	mitochondrial
AMCV02000112.1	mitochondrial
DS231684.1	mitochondrial
AMCV02000089.1	mitochondrial
JACVFG010000653.1	mitochondrial
DS231682.1	mitochondrial
PVPY01000077.1	mitochondrial
JAGPXF010000016.1	mitochondrial
JAHHPK010000214.1	mitochondrial
JAHHPK010000253.1	mitochondrial
JAHHPK010000244.1	mitochondrial
JAHHPK010000204.1	mitochondrial
JAHHPK010000259.1	mitochondrial
JAGMUX010000056.1	mitochondrial
JAHHPK010000270.1	mitochondrial
JAHHPK010000213.1	mitochondrial
JAHHPK010000147.1	mitochondrial
JAHHPK010000221.1	mitochondrial
JAHHPK010000237.1	mitochondrial
JAHHPK010000230.1	mitochondrial
JAHHPK010000251.1	mitochondrial
JAHHPK010000227.1	mitochondrial
JAHHPK010000152.1	mitochondrial
JAHHPK010000185.1	mitochondrial
JAHHPK010000174.1	mitochondrial
JAHHPK010000272.1	mitochondrial
JAHHPK010000187.1	mitochondrial
JAHHPK010000254.1	mitochondrial
JAHHPK010000241.1	mitochondrial
JAHHPK010000186.1	mitochondrial
JAHHPK010000176.1	mitochondrial
JAHHPK010000234.1	mitochondrial
JAHHPK010000177.1	mitochondrial
JAHHPK010000151.1	mitochondrial
JAHHPK010000197.1	mitochondrial
JAHHPK010000206.1	mitochondrial
JAHHPK010000274.1	mitochondrial
JAHHPK010000196.1	mitochondrial
JAHHPK010000171.1	mitochondrial
JAHHPK010000184.1	mitochondrial
JAHHPK010000238.1	mitochondrial
JAHSQG010000063.1	mitochondrial
JAHHPK010000191.1	mitochondrial
JAHHPK010000172.1	mitochondrial
JAHHPK010000215.1	mitochondrial
JAHHPK010000190.1	mitochondrial
JAHHPK010000263.1	mitochondrial
JAHHPK010000170.1	mitochondrial
JAHHPK010000266.1	mitochondrial
JAHHPK010000166.1	mitochondrial
JAHHPK010000162.1	mitochondrial
DS022269.1	mitochondrial
JAFFKB010000042.1	mitochondrial
CACSLJ010000792.1	mitochondrial
DS028303.1	mitochondrial
PHNK01072279.1	mitochondrial
QQZM01000144.1	mitochondrial
GG689762.1	mitochondrial
JNCO01022012.1	mitochondrial
JABSTD010000063.1	mitochondrial
LDPL01000025.1	mitochondrial
KI669976.1	mitochondrial
LAVV01001674.1	mitochondrial
MWRI01024351.1	mitochondrial
KK088495.1	mitochondrial
JAEQDS010000001.1	mitochondrial
LFZO01001286.1	mitochondrial
CACSLJ010000841.1	mitochondrial
MASP02001061.1	mitochondrial
LT855440.1	mitochondrial
GG690751.1	mitochondrial
DS028507.1	mitochondrial
LNQT01002947.1	mitochondrial
GG690752.1	mitochondrial
CH959353.1	mitochondrial
MCBS01023401.1	mitochondrial
GG690143.1	mitochondrial
JAGPXF010000020.1	mitochondrial
CAJHIT010000030.1	mitochondrial
KB932833.1	mitochondrial
GG697442.1	mitochondrial
DS028311.1	mitochondrial
LATX01001763.1	mitochondrial
SSNE01000257.1	mitochondrial
KI964903.1	mitochondrial
AMZP02005308.1	mitochondrial
LNQT01002857.1	mitochondrial
PHNK01004175.1	mitochondrial
LMVL02000018.1	mitochondrial
KE729513.1	mitochondrial
KE732586.1	mitochondrial
ABWE02000440.1	mitochondrial
MWRH01005476.1	mitochondrial
LAEV01001154.1	mitochondrial
CACSLJ010000929.1	mitochondrial
JAFFKB010000081.1	mitochondrial
KZ123861.1	mitochondrial
GG688907.1	mitochondrial
PHNK01105349.1	cross-kingdom contamination
PHNK01084752.1	cross-kingdom contamination
PHNK01094385.1	cross-kingdom contamination
PHNK01055090.1	cross-kingdom contamination
PHNK01107024.1	cross-kingdom contamination
PHNK01101262.1	cross-kingdom contamination
PHNK01092035.1	cross-kingdom contamination
PHNK01047267.1	cross-kingdom contamination
PHNK01108878.1	cross-kingdom contamination
PHNK01025021.1	cross-kingdom contamination
PHNK01050500.1	cross-kingdom contamination
PHNK01062303.1	cross-kingdom contamination
PHNK01094782.1	cross-kingdom contamination
PHNK01055419.1	cross-kingdom contamination
PHNK01037830.1	cross-kingdom contamination
PHNK01101073.1	cross-kingdom contamination
PHNK01090362.1	cross-kingdom contamination
PHNK01076603.1	cross-kingdom contamination
PHNK01072499.1	cross-kingdom contamination
PHNK01064898.1	cross-kingdom contamination
PHNK01029496.1	cross-kingdom contamination
PHNK01022425.1	cross-kingdom contamination
PHNK01045244.1	cross-kingdom contamination
PHNK01061567.1	cross-kingdom contamination
PHNK01022189.1	cross-kingdom contamination
PHNK01096200.1	cross-kingdom contamination
PHNK01087517.1	cross-kingdom contamination
PHNK01102845.1	cross-kingdom contamination
PHNK01081801.1	cross-kingdom contamination
PHNK01099634.1	cross-kingdom contamination
PHNK01028214.1	cross-kingdom contamination
PHNK01113572.1	cross-kingdom contamination
PHNK01068152.1	cross-kingdom contamination
PHNK01065297.1	cross-kingdom contamination
PHNK01055173.1	cross-kingdom contamination
PHNK01032933.1	cross-kingdom contamination
PHNK01115247.1	cross-kingdom contamination
PHNK01036449.1	cross-kingdom contamination
PHNK01040014.1	cross-kingdom contamination
PHNK01021575.1	cross-kingdom contamination
PHNK01094888.1	cross-kingdom contamination
PHNK01029197.1	cross-kingdom contamination
PHNK01115616.1	cross-kingdom contamination
PHNK01063508.1	cross-kingdom contamination
PHNK01050267.1	cross-kingdom contamination
PHNK01068937.1	cross-kingdom contamination
PHNK01022308.1	cross-kingdom contamination
PHNK01091753.1	cross-kingdom contamination
PHNK01064963.1	cross-kingdom contamination
PHNK01024584.1	cross-kingdom contamination
PHNK01040697.1	cross-kingdom contamination
PHNK01021155.1	cross-kingdom contamination
PHNK01089720.1	cross-kingdom contamination
PHNK01091457.1	cross-kingdom contamination
PHNK01023634.1	cross-kingdom contamination
PHNK01089023.1	cross-kingdom contamination
PHNK01040259.1	cross-kingdom contamination
PHNK01104706.1	cross-kingdom contamination
PHNK01054996.1	cross-kingdom contamination
PHNK01066767.1	cross-kingdom contamination
PHNK01087133.1	cross-kingdom contamination
PHNK01062839.1	cross-kingdom contamination
PHNK01022641.1	cross-kingdom contamination
PHNK01044303.1	cross-kingdom contamination
PHNK01020559.1	cross-kingdom contamination
PHNK01026962.1	cross-kingdom contamination
PHNK01074331.1	cross-kingdom contamination
PHNK01114234.1	cross-kingdom contamination
PHNK01068851.1	cross-kingdom contamination
PHNK01099694.1	cross-kingdom contamination
PHNK01029691.1	cross-kingdom contamination
PHNK01022031.1	cross-kingdom contamination
PHNK01061057.1	cross-kingdom contamination
PHNK01037743.1	cross-kingdom contamination
PHNK01099995.1	cross-kingdom contamination
PHNK01043438.1	cross-kingdom contamination
PHNK01025564.1	cross-kingdom contamination
PHNK01115096.1	cross-kingdom contamination
PHNK01097543.1	cross-kingdom contamination
PHNK01026483.1	cross-kingdom contamination
PHNK01025236.1	cross-kingdom contamination
PHNK01069555.1	cross-kingdom contamination
PHNK01042946.1	cross-kingdom contamination
PHNK01074786.1	cross-kingdom contamination
PHNK01058170.1	cross-kingdom contamination
PHNK01069383.1	cross-kingdom contamination
PHNK01024710.1	cross-kingdom contamination
PHNK01028177.1	cross-kingdom contamination
PHNK01061559.1	cross-kingdom contamination
PHNK01065603.1	cross-kingdom contamination
PHNK01098115.1	cross-kingdom contamination
PHNK01069706.1	cross-kingdom contamination
PHNK01099753.1	cross-kingdom contamination
PHNK01083723.1	cross-kingdom contamination
PHNK01035629.1	cross-kingdom contamination
PHNK01058778.1	cross-kingdom contamination
PHNK01101567.1	cross-kingdom contamination
PHNK01048068.1	cross-kingdom contamination
PHNK01031695.1	cross-kingdom contamination
PHNK01058148.1	cross-kingdom contamination
PHNK01057584.1	cross-kingdom contamination
PHNK01026568.1	cross-kingdom contamination
PHNK01111546.1	cross-kingdom contamination
PHNK01037468.1	cross-kingdom contamination
PHNK01028200.1	cross-kingdom contamination
PHNK01029345.1	cross-kingdom contamination
PHNK01028821.1	cross-kingdom contamination
PHNK01021919.1	cross-kingdom contamination
PHNK01027736.1	cross-kingdom contamination
PHNK01041845.1	cross-kingdom contamination
PHNK01102341.1	cross-kingdom contamination
PHNK01098825.1	cross-kingdom contamination
PHNK01031434.1	cross-kingdom contamination
PHNK01046590.1	cross-kingdom contamination
PHNK01037232.1	cross-kingdom contamination
PHNK01104788.1	cross-kingdom contamination
PHNK01107305.1	cross-kingdom contamination
PHNK01083779.1	cross-kingdom contamination
PHNK01104261.1	cross-kingdom contamination
PHNK01056277.1	cross-kingdom contamination
PHNK01032653.1	cross-kingdom contamination
PHNK01023626.1	cross-kingdom contamination
PHNK01018015.1	cross-kingdom contamination
PHNK01066663.1	cross-kingdom contamination
PHNK01080888.1	cross-kingdom contamination
PHNK01102848.1	cross-kingdom contamination
PHNK01111827.1	cross-kingdom contamination
PHNK01041117.1	cross-kingdom contamination
PHNK01081544.1	cross-kingdom contamination
PHNK01107406.1	cross-kingdom contamination
PHNK01108427.1	cross-kingdom contamination
PHNK01038968.1	cross-kingdom contamination
PHNK01077716.1	cross-kingdom contamination
PHNK01052385.1	cross-kingdom contamination
PHNK01060616.1	cross-kingdom contamination
PHNK01058719.1	cross-kingdom contamination
PHNK01071759.1	cross-kingdom contamination
PHNK01087959.1	cross-kingdom contamination
PHNK01090480.1	cross-kingdom contamination
PHNK01063500.1	cross-kingdom contamination
PHNK01088902.1	cross-kingdom contamination
PHNK01116583.1	cross-kingdom contamination
PHNK01113757.1	cross-kingdom contamination
PHNK01070812.1	cross-kingdom contamination
PHNK01094796.1	cross-kingdom contamination
PHNK01030450.1	cross-kingdom contamination
PHNK01063155.1	cross-kingdom contamination
PHNK01043063.1	cross-kingdom contamination
PHNK01097512.1	cross-kingdom contamination
PHNK01028579.1	cross-kingdom contamination
PHNK01023113.1	cross-kingdom contamination
PHNK01053481.1	cross-kingdom contamination
PHNK01030570.1	cross-kingdom contamination
PHNK01094619.1	cross-kingdom contamination
PHNK01025302.1	cross-kingdom contamination
PHNK01027759.1	cross-kingdom contamination
PHNK01105020.1	cross-kingdom contamination
PHNK01043382.1	cross-kingdom contamination
PHNK01109294.1	cross-kingdom contamination
PHNK01019128.1	cross-kingdom contamination
PHNK01031321.1	cross-kingdom contamination
PHNK01067229.1	cross-kingdom contamination
PHNK01056413.1	cross-kingdom contamination
PHNK01054904.1	cross-kingdom contamination
PHNK01049922.1	cross-kingdom contamination
PHNK01060469.1	cross-kingdom contamination
PHNK01048682.1	cross-kingdom contamination
PHNK01023994.1	cross-kingdom contamination
PHNK01054018.1	cross-kingdom contamination
PHNK01068996.1	cross-kingdom contamination
PHNK01077690.1	cross-kingdom contamination
PHNK01112637.1	cross-kingdom contamination
PHNK01070300.1	cross-kingdom contamination
PHNK01066001.1	cross-kingdom contamination
PHNK01111895.1	cross-kingdom contamination
PHNK01067938.1	cross-kingdom contamination
PHNK01084127.1	cross-kingdom contamination
PHNK01082629.1	cross-kingdom contamination
PHNK01060423.1	cross-kingdom contamination
PHNK01032133.1	cross-kingdom contamination
PHNK01080073.1	cross-kingdom contamination
PHNK01046562.1	cross-kingdom contamination
PHNK01113011.1	cross-kingdom contamination
PHNK01106322.1	cross-kingdom contamination
PHNK01062703.1	cross-kingdom contamination
PHNK01049830.1	cross-kingdom contamination
PHNK01116071.1	cross-kingdom contamination
PHNK01036007.1	cross-kingdom contamination
PHNK01021168.1	cross-kingdom contamination
PHNK01104032.1	cross-kingdom contamination
PHNK01059854.1	cross-kingdom contamination
PHNK01109357.1	cross-kingdom contamination
PHNK01041698.1	cross-kingdom contamination
PHNK01040673.1	cross-kingdom contamination
PHNK01043874.1	cross-kingdom contamination
PHNK01037544.1	cross-kingdom contamination
PHNK01106173.1	cross-kingdom contamination
PHNK01024697.1	cross-kingdom contamination
PHNK01080972.1	cross-kingdom contamination
PHNK01062516.1	cross-kingdom contamination
PHNK01104996.1	cross-kingdom contamination
PHNK01038916.1	cross-kingdom contamination
PHNK01043493.1	cross-kingdom contamination
PHNK01092747.1	cross-kingdom contamination
PHNK01110261.1	cross-kingdom contamination
PHNK01068632.1	cross-kingdom contamination
PHNK01094126.1	cross-kingdom contamination
PHNK01035475.1	cross-kingdom contamination
PHNK01116482.1	cross-kingdom contamination
PHNK01106074.1	cross-kingdom contamination
PHNK01051381.1	cross-kingdom contamination
PHNK01048359.1	cross-kingdom contamination
PHNK01043201.1	cross-kingdom contamination
PHNK01102758.1	cross-kingdom contamination
PHNK01100143.1	cross-kingdom contamination
PHNK01035027.1	cross-kingdom contamination
PHNK01114448.1	cross-kingdom contamination
PHNK01096038.1	cross-kingdom contamination
PHNK01035560.1	cross-kingdom contamination
PHNK01072394.1	cross-kingdom contamination
PHNK01082054.1	cross-kingdom contamination
PHNK01024228.1	cross-kingdom contamination
PHNK01070042.1	cross-kingdom contamination
PHNK01020568.1	cross-kingdom contamination
PHNK01031568.1	cross-kingdom contamination
PHNK01067724.1	cross-kingdom contamination
PHNK01096251.1	cross-kingdom contamination
PHNK01049894.1	cross-kingdom contamination
PHNK01045610.1	cross-kingdom contamination
PHNK01115735.1	cross-kingdom contamination
PHNK01073172.1	cross-kingdom contamination
PHNK01106665.1	cross-kingdom contamination
PHNK01027747.1	cross-kingdom contamination
PHNK01115823.1	cross-kingdom contamination
PHNK01087551.1	cross-kingdom contamination
PHNK01104288.1	cross-kingdom contamination
PHNK01035710.1	cross-kingdom contamination
PHNK01028864.1	cross-kingdom contamination
PHNK01036074.1	cross-kingdom contamination
PHNK01078383.1	cross-kingdom contamination
PHNK01070649.1	cross-kingdom contamination
PHNK01084143.1	cross-kingdom contamination
PHNK01054849.1	cross-kingdom contamination
PHNK01069665.1	cross-kingdom contamination
PHNK01044567.1	cross-kingdom contamination
PHNK01077144.1	cross-kingdom contamination
PHNK01099882.1	cross-kingdom contamination
KE732163.1	cross-kingdom contamination
KE724775.1	cross-kingdom contamination
PHNK01085301.1	cross-kingdom contamination
PHNK01115893.1	cross-kingdom contamination
PHNK01055308.1	cross-kingdom contamination
PHNK01050225.1	cross-kingdom contamination
PHNK01036782.1	cross-kingdom contamination
PHNK01058185.1	cross-kingdom contamination
PHNK01036909.1	cross-kingdom contamination
PHNK01036018.1	cross-kingdom contamination
PHNK01024671.1	cross-kingdom contamination
PHNK01097645.1	cross-kingdom contamination
PHNK01042958.1	cross-kingdom contamination
PHNK01037593.1	cross-kingdom contamination
PHNK01115763.1	cross-kingdom contamination
PHNK01080893.1	cross-kingdom contamination
PHNK01054892.1	cross-kingdom contamination
PHNK01104997.1	cross-kingdom contamination
PHNK01078663.1	cross-kingdom contamination
PHNK01041605.1	cross-kingdom contamination
PHNK01026815.1	cross-kingdom contamination
PHNK01095306.1	cross-kingdom contamination
PHNK01060073.1	cross-kingdom contamination
PHNK01079937.1	cross-kingdom contamination
PHNK01107658.1	cross-kingdom contamination
PHNK01023755.1	cross-kingdom contamination
PHNK01077132.1	cross-kingdom contamination
PHNK01095534.1	cross-kingdom contamination
PHNK01085085.1	cross-kingdom contamination
PHNK01097330.1	cross-kingdom contamination
PHNK01080594.1	cross-kingdom contamination
PHNK01044701.1	cross-kingdom contamination
PHNK01047442.1	cross-kingdom contamination
PHNK01098318.1	cross-kingdom contamination
PHNK01106070.1	cross-kingdom contamination
PHNK01105832.1	cross-kingdom contamination
PHNK01040958.1	cross-kingdom contamination
PHNK01034014.1	cross-kingdom contamination
PHNK01088127.1	cross-kingdom contamination
PHNK01043396.1	cross-kingdom contamination
PHNK01032889.1	cross-kingdom contamination
PHNK01026040.1	cross-kingdom contamination
PHNK01030978.1	cross-kingdom contamination
PHNK01075979.1	cross-kingdom contamination
PHNK01066206.1	cross-kingdom contamination
PHNK01109958.1	cross-kingdom contamination
PHNK01021938.1	cross-kingdom contamination
PHNK01064038.1	cross-kingdom contamination
PHNK01024256.1	cross-kingdom contamination
PHNK01044429.1	cross-kingdom contamination
PHNK01092542.1	cross-kingdom contamination
PHNK01040204.1	cross-kingdom contamination
PHNK01068896.1	cross-kingdom contamination
PHNK01082546.1	cross-kingdom contamination
PHNK01027069.1	cross-kingdom contamination
PHNK01075570.1	cross-kingdom contamination
PHNK01016449.1	cross-kingdom contamination
PHNK01077445.1	cross-kingdom contamination
PHNK01030544.1	cross-kingdom contamination
PHNK01029457.1	cross-kingdom contamination
PHNK01080127.1	cross-kingdom contamination
PHNK01031074.1	cross-kingdom contamination
PHNK01088620.1	cross-kingdom contamination
PHNK01092599.1	cross-kingdom contamination
PHNK01036684.1	cross-kingdom contamination
PHNK01114887.1	cross-kingdom contamination
PHNK01079925.1	cross-kingdom contamination
PHNK01085790.1	cross-kingdom contamination
PHNK01030569.1	cross-kingdom contamination
PHNK01101438.1	cross-kingdom contamination
PHNK01074628.1	cross-kingdom contamination
PHNK01023385.1	cross-kingdom contamination
PHNK01025991.1	cross-kingdom contamination
PHNK01053392.1	cross-kingdom contamination
PHNK01066906.1	cross-kingdom contamination
PHNK01058617.1	cross-kingdom contamination
PHNK01060606.1	cross-kingdom contamination
PHNK01085980.1	cross-kingdom contamination
PHNK01075219.1	cross-kingdom contamination
PHNK01055505.1	cross-kingdom contamination
PHNK01044676.1	cross-kingdom contamination
PHNK01047666.1	cross-kingdom contamination
PHNK01052119.1	cross-kingdom contamination
PHNK01075682.1	cross-kingdom contamination
PHNK01077185.1	cross-kingdom contamination
PHNK01066436.1	cross-kingdom contamination
PHNK01113269.1	cross-kingdom contamination
PHNK01092473.1	cross-kingdom contamination
PHNK01081536.1	cross-kingdom contamination
PHNK01046984.1	cross-kingdom contamination
PHNK01075191.1	cross-kingdom contamination
PHNK01055347.1	cross-kingdom contamination
PHNK01041724.1	cross-kingdom contamination
PHNK01035654.1	cross-kingdom contamination
PHNK01081528.1	cross-kingdom contamination
PHNK01077250.1	cross-kingdom contamination
KE725141.1	cross-kingdom contamination
KE732559.1	cross-kingdom contamination
KE732558.1	cross-kingdom contamination
KE728824.1	cross-kingdom contamination
PHNK01113225.1	cross-kingdom contamination
PHNK01054023.1	cross-kingdom contamination
PHNK01051296.1	cross-kingdom contamination
PHNK01102855.1	cross-kingdom contamination
PHNK01022274.1	cross-kingdom contamination
PHNK01042538.1	cross-kingdom contamination
PHNK01097375.1	cross-kingdom contamination
PHNK01021673.1	cross-kingdom contamination
PHNK01097832.1	cross-kingdom contamination
PHNK01033250.1	cross-kingdom contamination
PHNK01024277.1	cross-kingdom contamination
PHNK01045369.1	cross-kingdom contamination
PHNK01055487.1	cross-kingdom contamination
PHNK01037177.1	cross-kingdom contamination
PHNK01057968.1	cross-kingdom contamination
PHNK01105841.1	cross-kingdom contamination
PHNK01046879.1	cross-kingdom contamination
PHNK01104742.1	cross-kingdom contamination
PHNK01082234.1	cross-kingdom contamination
PHNK01071467.1	cross-kingdom contamination
PHNK01111240.1	cross-kingdom contamination
PHNK01081268.1	cross-kingdom contamination
PHNK01074165.1	cross-kingdom contamination
PHNK01080380.1	cross-kingdom contamination
PHNK01055191.1	cross-kingdom contamination
PHNK01090096.1	cross-kingdom contamination
PHNK01113531.1	cross-kingdom contamination
PHNK01098530.1	cross-kingdom contamination
PHNK01039011.1	cross-kingdom contamination
PHNK01045363.1	cross-kingdom contamination
PHNK01093054.1	cross-kingdom contamination
PHNK01050590.1	cross-kingdom contamination
PHNK01096433.1	cross-kingdom contamination
PHNK01038994.1	cross-kingdom contamination
PHNK01082953.1	cross-kingdom contamination
PHNK01064979.1	cross-kingdom contamination
PHNK01059581.1	cross-kingdom contamination
PHNK01058481.1	cross-kingdom contamination
PHNK01038108.1	cross-kingdom contamination
PHNK01018703.1	cross-kingdom contamination
PHNK01023709.1	cross-kingdom contamination
PHNK01100990.1	cross-kingdom contamination
PHNK01084808.1	cross-kingdom contamination
PHNK01075459.1	cross-kingdom contamination
PHNK01083872.1	cross-kingdom contamination
PHNK01024505.1	cross-kingdom contamination
PHNK01102179.1	cross-kingdom contamination
PHNK01041682.1	cross-kingdom contamination
PHNK01029607.1	cross-kingdom contamination
PHNK01079519.1	cross-kingdom contamination
PHNK01094696.1	cross-kingdom contamination
PHNK01027702.1	cross-kingdom contamination
PHNK01070213.1	cross-kingdom contamination
PHNK01099096.1	cross-kingdom contamination
PHNK01020884.1	cross-kingdom contamination
PHNK01096488.1	cross-kingdom contamination
PHNK01104438.1	cross-kingdom contamination
PHNK01069939.1	cross-kingdom contamination
PHNK01078045.1	cross-kingdom contamination
PHNK01038577.1	cross-kingdom contamination
PHNK01082365.1	cross-kingdom contamination
PHNK01083102.1	cross-kingdom contamination
PHNK01072111.1	cross-kingdom contamination
PHNK01025002.1	cross-kingdom contamination
PHNK01039109.1	cross-kingdom contamination
PHNK01025261.1	cross-kingdom contamination
PHNK01097870.1	cross-kingdom contamination
PHNK01089681.1	cross-kingdom contamination
PHNK01053931.1	cross-kingdom contamination
PHNK01099914.1	cross-kingdom contamination
PHNK01039634.1	cross-kingdom contamination
PHNK01110288.1	cross-kingdom contamination
PHNK01046780.1	cross-kingdom contamination
PHNK01075919.1	cross-kingdom contamination
PHNK01097495.1	cross-kingdom contamination
PHNK01112625.1	cross-kingdom contamination
PHNK01102691.1	cross-kingdom contamination
PHNK01036703.1	cross-kingdom contamination
PHNK01051149.1	cross-kingdom contamination
PHNK01100182.1	cross-kingdom contamination
PHNK01024139.1	cross-kingdom contamination
PHNK01028294.1	cross-kingdom contamination
PHNK01046897.1	cross-kingdom contamination
PHNK01073731.1	cross-kingdom contamination
PHNK01097250.1	cross-kingdom contamination
PHNK01039764.1	cross-kingdom contamination
PHNK01043327.1	cross-kingdom contamination
PHNK01107875.1	cross-kingdom contamination
PHNK01109355.1	cross-kingdom contamination
PHNK01028721.1	cross-kingdom contamination
PHNK01040194.1	cross-kingdom contamination
PHNK01048504.1	cross-kingdom contamination
PHNK01072325.1	cross-kingdom contamination
PHNK01107154.1	cross-kingdom contamination
PHNK01050033.1	cross-kingdom contamination
PHNK01077094.1	cross-kingdom contamination
PHNK01050994.1	cross-kingdom contamination
PHNK01052064.1	cross-kingdom contamination
PHNK01102189.1	cross-kingdom contamination
PHNK01087634.1	cross-kingdom contamination
PHNK01089226.1	cross-kingdom contamination
PHNK01048217.1	cross-kingdom contamination
PHNK01036560.1	cross-kingdom contamination
PHNK01104457.1	cross-kingdom contamination
PHNK01063175.1	cross-kingdom contamination
PHNK01116113.1	cross-kingdom contamination
PHNK01070610.1	cross-kingdom contamination
PJAC01000077.1	cross-kingdom contamination
PHNK01051598.1	cross-kingdom contamination
PHNK01027920.1	cross-kingdom contamination
PHNK01033509.1	cross-kingdom contamination
PHNK01100311.1	cross-kingdom contamination
PHNK01113839.1	cross-kingdom contamination
PHNK01048193.1	cross-kingdom contamination
PHNK01036646.1	cross-kingdom contamination
PHNK01115333.1	cross-kingdom contamination
PHNK01028130.1	cross-kingdom contamination
PHNK01022527.1	cross-kingdom contamination
PHNK01102481.1	cross-kingdom contamination
PHNK01037152.1	cross-kingdom contamination
PHNK01022548.1	cross-kingdom contamination
PHNK01082495.1	cross-kingdom contamination
PHNK01028590.1	cross-kingdom contamination
PHNK01032536.1	cross-kingdom contamination
PHNK01037662.1	cross-kingdom contamination
PHNK01064448.1	cross-kingdom contamination
PHNK01044146.1	cross-kingdom contamination
PHNK01109207.1	cross-kingdom contamination
PHNK01089187.1	cross-kingdom contamination
PHNK01043454.1	cross-kingdom contamination
PHNK01050754.1	cross-kingdom contamination
PHNK01111742.1	cross-kingdom contamination
PHNK01074909.1	cross-kingdom contamination
PHNK01031343.1	cross-kingdom contamination
PHNK01112753.1	cross-kingdom contamination
PHNK01062553.1	cross-kingdom contamination
PHNK01094022.1	cross-kingdom contamination
PHNK01109526.1	cross-kingdom contamination
PHNK01049786.1	cross-kingdom contamination
PHNK01080182.1	cross-kingdom contamination
PHNK01044627.1	cross-kingdom contamination
PHNK01025504.1	cross-kingdom contamination
PHNK01095173.1	cross-kingdom contamination
PHNK01109973.1	cross-kingdom contamination
PHNK01042464.1	cross-kingdom contamination
PHNK01107899.1	cross-kingdom contamination
PHNK01116242.1	cross-kingdom contamination
PHNK01026035.1	cross-kingdom contamination
PHNK01032988.1	cross-kingdom contamination
POSS01000141.1	cross-kingdom contamination
LFZO01002598.1	cross-kingdom contamination
MWRJ01007669.1	cross-kingdom contamination
ML992834.1	cross-kingdom contamination
PHNK01037660.1	cross-kingdom contamination
NBZP02000025.1	cross-kingdom contamination
LKMD01000098.1	cross-kingdom contamination
KE730102.1	cross-kingdom contamination
LFZN01000403.1	cross-kingdom contamination
PHNK01066154.1	cross-kingdom contamination
PHNK01042362.1	cross-kingdom contamination
PHNK01041887.1	cross-kingdom contamination
PHNK01104371.1	cross-kingdom contamination
PHNK01077625.1	cross-kingdom contamination
PHNK01053659.1	cross-kingdom contamination
PHNK01042915.1	cross-kingdom contamination
PHNK01032091.1	cross-kingdom contamination
PHNK01027149.1	cross-kingdom contamination
PHNK01090919.1	cross-kingdom contamination
PHNK01057108.1	cross-kingdom contamination
PHNK01036040.1	cross-kingdom contamination
PHNK01029638.1	cross-kingdom contamination
KE730144.1	cross-kingdom contamination
KE732468.1	cross-kingdom contamination
KE733057.1	cross-kingdom contamination
KE733056.1	cross-kingdom contamination
PHNK01071257.1	cross-kingdom contamination
PHNK01080145.1	cross-kingdom contamination
PHNK01061645.1	cross-kingdom contamination
PHNK01060124.1	cross-kingdom contamination
PHNK01109392.1	cross-kingdom contamination
PHNK01077886.1	cross-kingdom contamination
PHNK01083231.1	cross-kingdom contamination
PHNK01054105.1	cross-kingdom contamination
PHNK01115737.1	cross-kingdom contamination
PHNK01074454.1	cross-kingdom contamination
PHNK01107117.1	cross-kingdom contamination
PHNK01028259.1	cross-kingdom contamination
KE725960.1	cross-kingdom contamination
PHNK01049529.1	cross-kingdom contamination
PHNK01042967.1	cross-kingdom contamination
PHNK01112433.1	cross-kingdom contamination
MCBS01017777.1	cross-kingdom contamination
PNFH01000282.1	cross-kingdom contamination
PHNK01030623.1	cross-kingdom contamination
PHNK01053822.1	cross-kingdom contamination
PHNK01105085.1	cross-kingdom contamination
PHNK01078096.1	cross-kingdom contamination
PHNK01067556.1	cross-kingdom contamination
PHNK01087920.1	cross-kingdom contamination
PHNK01024309.1	cross-kingdom contamination
PHNK01085014.1	cross-kingdom contamination
PHNK01093043.1	cross-kingdom contamination
PHNK01023103.1	cross-kingdom contamination
PHNK01061249.1	cross-kingdom contamination
PHNK01032064.1	cross-kingdom contamination
PHNK01064748.1	cross-kingdom contamination
PHNK01108609.1	cross-kingdom contamination
PHNK01053905.1	cross-kingdom contamination
PHNK01101027.1	cross-kingdom contamination
PHNK01108409.1	cross-kingdom contamination
PHNK01107500.1	cross-kingdom contamination
PHNK01058436.1	cross-kingdom contamination
PHNK01075385.1	cross-kingdom contamination
PHNK01046426.1	cross-kingdom contamination
PNFH01000258.1	cross-kingdom contamination
PJAC01000074.1	cross-kingdom contamination
PNFH01000266.1	cross-kingdom contamination
PHNK01065255.1	cross-kingdom contamination
PHNK01111363.1	cross-kingdom contamination
PHNK01061755.1	cross-kingdom contamination
PHNK01111232.1	cross-kingdom contamination
PHNK01097557.1	cross-kingdom contamination
PHNK01083644.1	cross-kingdom contamination
PHNK01032989.1	cross-kingdom contamination
PHNK01046154.1	cross-kingdom contamination
PHNK01073605.1	cross-kingdom contamination
PHNK01095840.1	cross-kingdom contamination
PHNK01106508.1	cross-kingdom contamination
PHNK01032142.1	cross-kingdom contamination
PHNK01044325.1	cross-kingdom contamination
PHNK01028696.1	cross-kingdom contamination
PHNK01026650.1	cross-kingdom contamination
PHNK01027283.1	cross-kingdom contamination
PHNK01031883.1	cross-kingdom contamination
PHNK01061328.1	cross-kingdom contamination
PHNK01079031.1	cross-kingdom contamination
PHNK01068550.1	cross-kingdom contamination
PHNK01074766.1	cross-kingdom contamination
PHNK01064961.1	cross-kingdom contamination
PHNK01036132.1	cross-kingdom contamination
PHNK01103654.1	cross-kingdom contamination
PHNK01092171.1	cross-kingdom contamination
PHNK01075987.1	cross-kingdom contamination
PHNK01055894.1	cross-kingdom contamination
PHNK01109143.1	cross-kingdom contamination
PHNK01034842.1	cross-kingdom contamination
LFIW01000883.1	cross-kingdom contamination
PHNK01092151.1	cross-kingdom contamination
PHNK01064566.1	cross-kingdom contamination
PHNK01032089.1	cross-kingdom contamination
PHNK01038897.1	cross-kingdom contamination
PHNK01080835.1	cross-kingdom contamination
PHNK01036607.1	cross-kingdom contamination
PHNK01112679.1	cross-kingdom contamination
PHNK01029937.1	cross-kingdom contamination
PHNK01037100.1	cross-kingdom contamination
PHNK01050956.1	cross-kingdom contamination
PHNK01091468.1	cross-kingdom contamination
PHNK01093753.1	cross-kingdom contamination
PHNK01107806.1	cross-kingdom contamination
PHNK01074783.1	cross-kingdom contamination
PHNK01098571.1	cross-kingdom contamination
PHNK01054322.1	cross-kingdom contamination
PHNK01094151.1	cross-kingdom contamination
PHNK01048577.1	cross-kingdom contamination
PHNK01069609.1	cross-kingdom contamination
PHNK01084653.1	cross-kingdom contamination
PHNK01093293.1	cross-kingdom contamination
PHNK01101229.1	cross-kingdom contamination
PHNK01045424.1	cross-kingdom contamination
PHNK01072908.1	cross-kingdom contamination
PHNK01062639.1	cross-kingdom contamination
PHNK01080397.1	cross-kingdom contamination
PHNK01059639.1	cross-kingdom contamination
PHNK01092697.1	cross-kingdom contamination
PHNK01034318.1	cross-kingdom contamination
PHNK01075302.1	cross-kingdom contamination
PHNK01106374.1	cross-kingdom contamination
KE733834.1	cross-kingdom contamination
KE729823.1	cross-kingdom contamination
KE723675.1	cross-kingdom contamination
KE723397.1	cross-kingdom contamination
KE732938.1	cross-kingdom contamination
KE728348.1	cross-kingdom contamination
KE731905.1	cross-kingdom contamination
KE727992.1	cross-kingdom contamination
PHNK01048902.1	cross-kingdom contamination
PHNK01082934.1	cross-kingdom contamination
PHNK01095940.1	cross-kingdom contamination
PHNK01097370.1	cross-kingdom contamination
PHNK01082844.1	cross-kingdom contamination
PHNK01054782.1	cross-kingdom contamination
PHNK01075707.1	cross-kingdom contamination
PHNK01078680.1	cross-kingdom contamination
PHNK01107065.1	cross-kingdom contamination
PHNK01061330.1	cross-kingdom contamination
PHNK01033910.1	cross-kingdom contamination
PHNK01047801.1	cross-kingdom contamination
PHNK01073660.1	cross-kingdom contamination
PHNK01020569.1	cross-kingdom contamination
PHNK01055138.1	cross-kingdom contamination
PHNK01082347.1	cross-kingdom contamination
PHNK01040488.1	cross-kingdom contamination
PHNK01045697.1	cross-kingdom contamination
PHNK01045358.1	cross-kingdom contamination
POSS01000813.1	cross-kingdom contamination
PHNK01075016.1	cross-kingdom contamination
KE731533.1	cross-kingdom contamination
PNFH01000268.1	cross-kingdom contamination
MCBS01009866.1	cross-kingdom contamination
PHNK01035873.1	cross-kingdom contamination
PNFH01000175.1	cross-kingdom contamination
PHNK01026470.1	cross-kingdom contamination
PHNK01028793.1	cross-kingdom contamination
PHNK01077577.1	cross-kingdom contamination
PHNK01061083.1	cross-kingdom contamination
PHNK01036131.1	cross-kingdom contamination
PHNK01076079.1	cross-kingdom contamination
PHNK01078437.1	cross-kingdom contamination
PHNK01023796.1	cross-kingdom contamination
PHNK01025022.1	cross-kingdom contamination
PHNK01099513.1	cross-kingdom contamination
PHNK01090881.1	cross-kingdom contamination
PHNK01034184.1	cross-kingdom contamination
PHNK01046329.1	cross-kingdom contamination
PHNK01044427.1	cross-kingdom contamination
PHNK01066103.1	cross-kingdom contamination
PHNK01066530.1	cross-kingdom contamination
KE724944.1	cross-kingdom contamination
KE727034.1	cross-kingdom contamination
KE722931.1	cross-kingdom contamination
KE733129.1	cross-kingdom contamination
KE724786.1	cross-kingdom contamination
PHNK01104154.1	cross-kingdom contamination
PHNK01054784.1	cross-kingdom contamination
PHNK01055475.1	cross-kingdom contamination
PHNK01058532.1	cross-kingdom contamination
PHNK01114168.1	cross-kingdom contamination
PHNK01028169.1	cross-kingdom contamination
PHNK01019314.1	cross-kingdom contamination
PHNK01053559.1	cross-kingdom contamination
PHNK01036115.1	cross-kingdom contamination
PHNK01039879.1	cross-kingdom contamination
PHNK01090916.1	cross-kingdom contamination
PHNK01100860.1	cross-kingdom contamination
PHNK01024562.1	cross-kingdom contamination
PHNK01087305.1	cross-kingdom contamination
KE733419.1	cross-kingdom contamination
MWRK01012914.1	cross-kingdom contamination
PHNK01114859.1	cross-kingdom contamination
PHNK01058452.1	cross-kingdom contamination
PHNK01094505.1	cross-kingdom contamination
PHNK01099013.1	cross-kingdom contamination
KE728994.1	cross-kingdom contamination
KE726759.1	cross-kingdom contamination
KE728577.1	cross-kingdom contamination
PHNK01034736.1	cross-kingdom contamination
PHNK01103594.1	cross-kingdom contamination
PHNK01091752.1	cross-kingdom contamination
PHNK01084827.1	cross-kingdom contamination
PHNK01106797.1	cross-kingdom contamination
PHNK01043795.1	cross-kingdom contamination
KE730915.1	cross-kingdom contamination
PHNK01082096.1	cross-kingdom contamination
KE727017.1	cross-kingdom contamination
PHNK01032928.1	cross-kingdom contamination
PHNK01097620.1	cross-kingdom contamination
PHNK01098690.1	cross-kingdom contamination
PHNK01084665.1	cross-kingdom contamination
PHNK01106761.1	cross-kingdom contamination
PHNK01070060.1	cross-kingdom contamination
PHNK01061060.1	cross-kingdom contamination
PHNK01046970.1	cross-kingdom contamination
PHNK01086238.1	cross-kingdom contamination
PHNK01094493.1	cross-kingdom contamination
PHNK01059974.1	cross-kingdom contamination
PHNK01071705.1	cross-kingdom contamination
PHNK01073389.1	cross-kingdom contamination
PHNK01051251.1	cross-kingdom contamination
PHNK01068042.1	cross-kingdom contamination
PHNK01056808.1	cross-kingdom contamination
PHNK01085787.1	cross-kingdom contamination
PHNK01110134.1	cross-kingdom contamination
PHNK01082168.1	cross-kingdom contamination
PHNK01033172.1	cross-kingdom contamination
PHNK01034229.1	cross-kingdom contamination
PHNK01053167.1	cross-kingdom contamination
NBZP02000047.1	cross-kingdom contamination
PHNK01036898.1	cross-kingdom contamination
PHNK01055871.1	cross-kingdom contamination
PHNK01057179.1	cross-kingdom contamination
PHNK01073570.1	cross-kingdom contamination
PHNK01060413.1	cross-kingdom contamination
PHNK01059490.1	cross-kingdom contamination
PHNK01056934.1	cross-kingdom contamination
KE728915.1	cross-kingdom contamination
KE723826.1	cross-kingdom contamination
KE726115.1	cross-kingdom contamination
KE724231.1	cross-kingdom contamination
PHNK01109281.1	cross-kingdom contamination
PHNK01066381.1	cross-kingdom contamination
PHNK01040595.1	cross-kingdom contamination
PHNK01071623.1	cross-kingdom contamination
PHNK01074741.1	cross-kingdom contamination
PHNK01039139.1	cross-kingdom contamination
PHNK01036219.1	cross-kingdom contamination
PHNK01104338.1	cross-kingdom contamination
PHNK01077297.1	cross-kingdom contamination
PHNK01111864.1	cross-kingdom contamination
PHNK01033344.1	cross-kingdom contamination
KE729479.1	cross-kingdom contamination
KE730005.1	cross-kingdom contamination
PHNK01092654.1	cross-kingdom contamination
PHNK01080081.1	cross-kingdom contamination
PHNK01073230.1	cross-kingdom contamination
PHNK01041593.1	cross-kingdom contamination
PHNK01038265.1	cross-kingdom contamination
PHNK01112546.1	cross-kingdom contamination
PHNK01084382.1	cross-kingdom contamination
PHNK01074436.1	cross-kingdom contamination
PHNK01094152.1	cross-kingdom contamination
PHNK01086173.1	cross-kingdom contamination
PHNK01047723.1	cross-kingdom contamination
PHNK01101524.1	cross-kingdom contamination
PHNK01050856.1	cross-kingdom contamination
PHNK01067115.1	cross-kingdom contamination
PHNK01091069.1	cross-kingdom contamination
PHNK01060113.1	cross-kingdom contamination
PHNK01030275.1	cross-kingdom contamination
PHNK01067123.1	cross-kingdom contamination
PHNK01033708.1	cross-kingdom contamination
PHNK01063397.1	cross-kingdom contamination
PHNK01058373.1	cross-kingdom contamination
PHNK01064736.1	cross-kingdom contamination
PHNK01023710.1	cross-kingdom contamination
PHNK01114972.1	cross-kingdom contamination
PHNK01104242.1	cross-kingdom contamination
PHNK01080540.1	cross-kingdom contamination
PHNK01064173.1	cross-kingdom contamination
MCBS01024561.1	cross-kingdom contamination
PHNK01055121.1	cross-kingdom contamination
PHNK01075889.1	cross-kingdom contamination
PHNK01074453.1	cross-kingdom contamination
PHNK01104164.1	cross-kingdom contamination
PHNK01030452.1	cross-kingdom contamination
PHNK01101153.1	cross-kingdom contamination
PHNK01059285.1	cross-kingdom contamination
PHNK01098624.1	cross-kingdom contamination
PHNK01035957.1	cross-kingdom contamination
PHNK01053574.1	cross-kingdom contamination
PHNK01056092.1	cross-kingdom contamination
PHNK01058993.1	cross-kingdom contamination
PHNK01061801.1	cross-kingdom contamination
PHNK01042733.1	cross-kingdom contamination
SSNE01000397.1	cross-kingdom contamination
PHNK01115729.1	cross-kingdom contamination
PHNK01098132.1	cross-kingdom contamination
PHNK01071547.1	cross-kingdom contamination
KE729498.1	cross-kingdom contamination
KE732936.1	cross-kingdom contamination
KE727925.1	cross-kingdom contamination
KE732023.1	cross-kingdom contamination
KE733019.1	cross-kingdom contamination
PHNK01104538.1	cross-kingdom contamination
PHNK01033655.1	cross-kingdom contamination
PHNK01058772.1	cross-kingdom contamination
PHNK01064758.1	cross-kingdom contamination
PHNK01039948.1	cross-kingdom contamination
PHNK01055338.1	cross-kingdom contamination
PHNK01092700.1	cross-kingdom contamination
PHNK01029668.1	cross-kingdom contamination
PHNK01055249.1	cross-kingdom contamination
PHNK01116099.1	cross-kingdom contamination
PHNK01110670.1	cross-kingdom contamination
PHNK01097071.1	cross-kingdom contamination
PHNK01089230.1	cross-kingdom contamination
KE724905.1	cross-kingdom contamination
PHNK01031649.1	cross-kingdom contamination
PHNK01070395.1	cross-kingdom contamination
PHNK01072326.1	cross-kingdom contamination
PHNK01068231.1	cross-kingdom contamination
PHNK01034220.1	cross-kingdom contamination
PHNK01106271.1	cross-kingdom contamination
PHNK01092947.1	cross-kingdom contamination
PHNK01070900.1	cross-kingdom contamination
PHNK01105968.1	cross-kingdom contamination
PHNK01095370.1	cross-kingdom contamination
PHNK01057871.1	cross-kingdom contamination
PHNK01068672.1	cross-kingdom contamination
PHNK01071906.1	cross-kingdom contamination
PHNK01073125.1	cross-kingdom contamination
PHNK01071830.1	cross-kingdom contamination
PHNK01064929.1	cross-kingdom contamination
PHNK01094084.1	cross-kingdom contamination
PHNK01050761.1	cross-kingdom contamination
PHNK01041499.1	cross-kingdom contamination
KE729586.1	cross-kingdom contamination
KE733239.1	cross-kingdom contamination
KE724638.1	cross-kingdom contamination
PHNK01050511.1	cross-kingdom contamination
KE732342.1	cross-kingdom contamination
KE729203.1	cross-kingdom contamination
KE730589.1	cross-kingdom contamination
PHNK01098442.1	cross-kingdom contamination
PHNK01070859.1	cross-kingdom contamination
MCBS01019959.1	cross-kingdom contamination
MCBS01018467.1	cross-kingdom contamination
PHNK01090771.1	cross-kingdom contamination
KE730290.1	cross-kingdom contamination
KE729246.1	cross-kingdom contamination
KE726233.1	cross-kingdom contamination
KE730322.1	cross-kingdom contamination
KE722922.1	cross-kingdom contamination
KE724977.1	cross-kingdom contamination
KE730604.1	cross-kingdom contamination
KE728656.1	cross-kingdom contamination
KE734673.1	cross-kingdom contamination
KE730271.1	cross-kingdom contamination
KE728149.1	cross-kingdom contamination
PHNK01085207.1	cross-kingdom contamination
PHNK01025066.1	cross-kingdom contamination
PHNK01082693.1	cross-kingdom contamination
PHNK01057202.1	cross-kingdom contamination
PHNK01054464.1	cross-kingdom contamination
PHNK01103252.1	cross-kingdom contamination
PHNK01054042.1	cross-kingdom contamination
PHNK01109876.1	cross-kingdom contamination
PNFH01000032.1	cross-kingdom contamination
PHNK01037529.1	cross-kingdom contamination
PHNK01089098.1	cross-kingdom contamination
PHNK01026883.1	cross-kingdom contamination
KE726371.1	cross-kingdom contamination
KE723350.1	cross-kingdom contamination
KE728002.1	cross-kingdom contamination
KE728003.1	cross-kingdom contamination
KE728733.1	cross-kingdom contamination
MWRI01000548.1	cross-kingdom contamination
KE729505.1	cross-kingdom contamination
KE725795.1	cross-kingdom contamination
KE722391.1	cross-kingdom contamination
KE732002.1	cross-kingdom contamination
PHNK01099716.1	cross-kingdom contamination
KE725493.1	cross-kingdom contamination
PHNK01019276.1	cross-kingdom contamination
KE732145.1	cross-kingdom contamination
KE729004.1	cross-kingdom contamination
KE729622.1	cross-kingdom contamination
PHNK01111135.1	cross-kingdom contamination
PHNK01021602.1	cross-kingdom contamination
PHNK01022053.1	cross-kingdom contamination
PHNK01040073.1	cross-kingdom contamination
SSNE01000219.1	cross-kingdom contamination
SSNE01000191.1	cross-kingdom contamination
WOUF01000012.1	cross-kingdom contamination
RYYQ01000033.1	cross-kingdom contamination
JAHHPK010000222.1	cross-kingdom contamination
CM033788.1	cross-kingdom contamination
PHNK01070947.1	cross-kingdom contamination
PHNK01036519.1	cross-kingdom contamination
PHNK01098982.1	cross-kingdom contamination
PHNK01025995.1	cross-kingdom contamination
PHNK01107815.1	cross-kingdom contamination
PHNK01050932.1	cross-kingdom contamination
PHNK01039442.1	cross-kingdom contamination
PHNK01067861.1	cross-kingdom contamination
PHNK01067212.1	cross-kingdom contamination
PHNK01056675.1	cross-kingdom contamination
PHNK01100096.1	cross-kingdom contamination
PHNK01108561.1	cross-kingdom contamination
PHNK01116202.1	cross-kingdom contamination
PHNK01031661.1	cross-kingdom contamination
PHNK01052432.1	cross-kingdom contamination
PHNK01112305.1	cross-kingdom contamination
SSNE01000193.1	cross-kingdom contamination
PHNK01056345.1	cross-kingdom contamination
PHNK01037638.1	cross-kingdom contamination
PHNK01023624.1	cross-kingdom contamination
PHNK01059039.1	cross-kingdom contamination
PHNK01104174.1	cross-kingdom contamination
PHNK01050000.1	cross-kingdom contamination
PHNK01030057.1	cross-kingdom contamination
KE724183.1	cross-kingdom contamination
KE733300.1	cross-kingdom contamination
KE730863.1	cross-kingdom contamination
KE731394.1	cross-kingdom contamination
KE731393.1	cross-kingdom contamination
KE729014.1	cross-kingdom contamination
KE729678.1	cross-kingdom contamination
KE722871.1	cross-kingdom contamination
PHNK01056045.1	cross-kingdom contamination
PHNK01060973.1	cross-kingdom contamination
PHNK01082747.1	cross-kingdom contamination
PHNK01107800.1	cross-kingdom contamination
PHNK01066816.1	cross-kingdom contamination
PHNK01106183.1	cross-kingdom contamination
PHNK01110383.1	cross-kingdom contamination
PHNK01029408.1	cross-kingdom contamination
PHNK01109863.1	cross-kingdom contamination
KE728985.1	cross-kingdom contamination
PHNK01033049.1	cross-kingdom contamination
PHNK01094906.1	cross-kingdom contamination
PHNK01103877.1	cross-kingdom contamination
PHNK01070118.1	cross-kingdom contamination
PHNK01040160.1	cross-kingdom contamination
PHNK01025969.1	cross-kingdom contamination
KE724371.1	cross-kingdom contamination
PHNK01053337.1	cross-kingdom contamination
PHNK01069707.1	cross-kingdom contamination
PHNK01037364.1	cross-kingdom contamination
PHNK01103769.1	cross-kingdom contamination
PHNK01105290.1	cross-kingdom contamination
PHNK01115180.1	cross-kingdom contamination
PHNK01065610.1	cross-kingdom contamination
PHNK01051888.1	cross-kingdom contamination
PHNK01051589.1	cross-kingdom contamination
PHNK01041215.1	cross-kingdom contamination
KE733806.1	cross-kingdom contamination
PHNK01066416.1	cross-kingdom contamination
PHNK01090930.1	cross-kingdom contamination
KE729958.1	cross-kingdom contamination
KE725001.1	cross-kingdom contamination
KE728611.1	cross-kingdom contamination
KE730602.1	cross-kingdom contamination
KE728673.1	cross-kingdom contamination
KE727918.1	cross-kingdom contamination
KE727774.1	cross-kingdom contamination
KE732775.1	cross-kingdom contamination
PHNK01061991.1	cross-kingdom contamination
PHNK01031154.1	cross-kingdom contamination
PHNK01034535.1	cross-kingdom contamination
PHNK01037135.1	cross-kingdom contamination
KE727989.1	cross-kingdom contamination
PHNK01042322.1	cross-kingdom contamination
SSNE01000240.1	cross-kingdom contamination
PHNK01051767.1	cross-kingdom contamination
PHNK01112395.1	cross-kingdom contamination
KE734262.1	cross-kingdom contamination
KE727531.1	cross-kingdom contamination
KE728875.1	cross-kingdom contamination
KE731467.1	cross-kingdom contamination
KE733035.1	cross-kingdom contamination
KE733036.1	cross-kingdom contamination
PHNK01059116.1	cross-kingdom contamination
PHNK01098340.1	cross-kingdom contamination
PHNK01071043.1	cross-kingdom contamination
PHNK01114929.1	cross-kingdom contamination
PHNK01087300.1	cross-kingdom contamination
PHNK01069226.1	cross-kingdom contamination
PHNK01085870.1	cross-kingdom contamination
PHNK01048284.1	cross-kingdom contamination
PHNK01115942.1	cross-kingdom contamination
PHNK01064704.1	cross-kingdom contamination
PHNK01107051.1	cross-kingdom contamination
KE725063.1	cross-kingdom contamination
PHNK01057690.1	cross-kingdom contamination
KE730588.1	cross-kingdom contamination
PHNK01062455.1	cross-kingdom contamination
PHNK01103991.1	cross-kingdom contamination
PHNK01079069.1	cross-kingdom contamination
PHNK01054524.1	cross-kingdom contamination
PHNK01105801.1	cross-kingdom contamination
PHNK01046351.1	cross-kingdom contamination
PHNK01110619.1	cross-kingdom contamination
KE731434.1	cross-kingdom contamination
KE725545.1	cross-kingdom contamination
KE732629.1	cross-kingdom contamination
KE731354.1	cross-kingdom contamination
KE730522.1	cross-kingdom contamination
PHNK01065546.1	cross-kingdom contamination
PHNK01090202.1	cross-kingdom contamination
PHNK01067206.1	cross-kingdom contamination
PNFH01000256.1	cross-kingdom contamination
PHNK01039631.1	cross-kingdom contamination
PHNK01065431.1	cross-kingdom contamination
SSNE01000286.1	cross-kingdom contamination
PHNK01107327.1	cross-kingdom contamination
PHNK01043100.1	cross-kingdom contamination
PHNK01046774.1	cross-kingdom contamination
PHNK01049680.1	cross-kingdom contamination
PHNK01101401.1	cross-kingdom contamination
KE722980.1	cross-kingdom contamination
PHNK01094545.1	cross-kingdom contamination
PHNK01067424.1	cross-kingdom contamination
PHNK01110078.1	cross-kingdom contamination
PHNK01085359.1	cross-kingdom contamination
PHNK01063274.1	cross-kingdom contamination
PHNK01088208.1	cross-kingdom contamination
PHNK01089529.1	cross-kingdom contamination
KE729806.1	cross-kingdom contamination
JAFBAW010000052.1	cross-kingdom contamination
PHNK01035119.1	cross-kingdom contamination
KE730344.1	cross-kingdom contamination
KE730408.1	cross-kingdom contamination
PHNK01040037.1	cross-kingdom contamination
KE723312.1	cross-kingdom contamination
LAEV01000730.1	cross-kingdom contamination
LAEV01002298.1	cross-kingdom contamination
PHNK01092623.1	cross-kingdom contamination
PHNK01114816.1	cross-kingdom contamination
PHNK01083252.1	cross-kingdom contamination
PHNK01066453.1	cross-kingdom contamination
PHNK01033087.1	cross-kingdom contamination
PHNK01020570.1	cross-kingdom contamination
PHNK01059735.1	cross-kingdom contamination
PVPY01001241.1	cross-kingdom contamination
JAHHPK010000224.1	cross-kingdom contamination
JAHSQG010000054.1	cross-kingdom contamination
JAHSQG010000058.1	cross-kingdom contamination
KE730451.1	cross-kingdom contamination
PHNK01073882.1	cross-kingdom contamination
PHNK01030453.1	cross-kingdom contamination
PHNK01047259.1	cross-kingdom contamination
KE728734.1	cross-kingdom contamination
KE730238.1	cross-kingdom contamination
KE732350.1	cross-kingdom contamination
LAEV01000661.1	cross-kingdom contamination
PHNK01102421.1	cross-kingdom contamination
PHNK01067885.1	cross-kingdom contamination
ULHA01000026.1	cross-kingdom contamination
MWRI01004824.1	cross-kingdom contamination
KE723465.1	cross-kingdom contamination
KE732621.1	cross-kingdom contamination
KE733421.1	cross-kingdom contamination
KE728535.1	cross-kingdom contamination
PHNK01115186.1	cross-kingdom contamination
POSS01000573.1	cross-kingdom contamination
PHNK01087265.1	cross-kingdom contamination
CCYA01000358.1	cross-kingdom contamination
FJOF01000026.1	cross-kingdom contamination
PHNK01067100.1	cross-kingdom contamination
PHNK01064720.1	cross-kingdom contamination
LTAN01000016.1	cross-kingdom contamination
JAHHPK010000210.1	cross-kingdom contamination
RYYQ01000028.1	cross-kingdom contamination
JAHHPK010000154.1	cross-kingdom contamination
GL883109.1	cross-kingdom contamination
KE732001.1	cross-kingdom contamination
PHNK01038783.1	cross-kingdom contamination
PHNK01060327.1	cross-kingdom contamination
PHNK01056794.1	cross-kingdom contamination
JAFBAW010000017.1	cross-kingdom contamination
PHNK01048693.1	cross-kingdom contamination
PHNK01006724.1	cross-kingdom contamination
PHNK01110745.1	cross-kingdom contamination
PHNK01052680.1	cross-kingdom contamination
PHNK01108881.1	cross-kingdom contamination
PHNK01055552.1	cross-kingdom contamination
PHNK01112554.1	cross-kingdom contamination
PHNK01045149.1	cross-kingdom contamination
KE722998.1	cross-kingdom contamination
KE731819.1	cross-kingdom contamination
KE730486.1	cross-kingdom contamination
KE731222.1	cross-kingdom contamination
KE723874.1	cross-kingdom contamination
KE733966.1	cross-kingdom contamination
PHNK01049404.1	cross-kingdom contamination
PHNK01095503.1	cross-kingdom contamination
KE726667.1	cross-kingdom contamination
PHNK01097088.1	cross-kingdom contamination
KE731694.1	cross-kingdom contamination
KE727814.1	cross-kingdom contamination
KE727813.1	cross-kingdom contamination
KE724463.1	cross-kingdom contamination
KE733961.1	cross-kingdom contamination
KE733636.1	cross-kingdom contamination
LAEV01001358.1	cross-kingdom contamination
PHNK01086939.1	cross-kingdom contamination
PHNK01082134.1	cross-kingdom contamination
PHNK01104578.1	cross-kingdom contamination
KE722757.1	cross-kingdom contamination
KE722598.1	cross-kingdom contamination
PHNK01089984.1	cross-kingdom contamination
KE733583.1	cross-kingdom contamination
KE733999.1	cross-kingdom contamination
PHNK01097729.1	cross-kingdom contamination
PHNK01081708.1	cross-kingdom contamination
KE725160.1	cross-kingdom contamination
MCBS01015881.1	cross-kingdom contamination
PHNK01108950.1	cross-kingdom contamination
KE732084.1	cross-kingdom contamination
KE733467.1	cross-kingdom contamination
KE732507.1	cross-kingdom contamination
KE726541.1	cross-kingdom contamination
MWRI01003322.1	cross-kingdom contamination
KE732458.1	cross-kingdom contamination
KE726527.1	cross-kingdom contamination
PHNK01071916.1	cross-kingdom contamination
PHNK01069379.1	cross-kingdom contamination
PHNK01075450.1	cross-kingdom contamination
KE728658.1	cross-kingdom contamination
KE728657.1	cross-kingdom contamination
PHNK01109417.1	cross-kingdom contamination
PHNK01115343.1	cross-kingdom contamination
ABRE01018276.1	cross-kingdom contamination
PHNK01092917.1	cross-kingdom contamination
MCBS01022656.1	cross-kingdom contamination
KE725872.1	cross-kingdom contamination
KE722722.1	cross-kingdom contamination
KE725378.1	cross-kingdom contamination
KE722849.1	cross-kingdom contamination
KE727470.1	cross-kingdom contamination
KE727186.1	cross-kingdom contamination
KE725889.1	cross-kingdom contamination
KE727111.1	cross-kingdom contamination
KE724411.1	cross-kingdom contamination
PHNK01092263.1	cross-kingdom contamination
KE733287.1	cross-kingdom contamination
CAJHIT010000024.1	cross-kingdom contamination
KE723387.1	cross-kingdom contamination
KE726199.1	cross-kingdom contamination
KE724994.1	cross-kingdom contamination
PHNK01051809.1	cross-kingdom contamination
KE727980.1	cross-kingdom contamination
KE730700.1	cross-kingdom contamination
KE732716.1	cross-kingdom contamination
PHNK01046155.1	cross-kingdom contamination
PHNK01025844.1	cross-kingdom contamination
PHNK01086704.1	cross-kingdom contamination
PHNK01043693.1	cross-kingdom contamination
SSNE01000363.1	cross-kingdom contamination
KE729593.1	cross-kingdom contamination
KE733017.1	cross-kingdom contamination
PHNK01034855.1	cross-kingdom contamination
PHNK01074354.1	cross-kingdom contamination
SSNE01000185.1	cross-kingdom contamination
KE728244.1	cross-kingdom contamination
KE729908.1	cross-kingdom contamination
KE733269.1	cross-kingdom contamination
KE730740.1	cross-kingdom contamination
KE730804.1	cross-kingdom contamination
KE732596.1	cross-kingdom contamination
PHNK01042916.1	cross-kingdom contamination
PHNK01109427.1	cross-kingdom contamination
PHNK01083932.1	cross-kingdom contamination
KE729819.1	cross-kingdom contamination
PHNK01092531.1	cross-kingdom contamination
PHNK01000139.1	cross-kingdom contamination
KE734268.1	cross-kingdom contamination
KE729811.1	cross-kingdom contamination
KE730515.1	cross-kingdom contamination
KE729000.1	cross-kingdom contamination
SSNE01000315.1	cross-kingdom contamination
SSNE01000341.1	cross-kingdom contamination
PHNK01096426.1	cross-kingdom contamination
KE731474.1	cross-kingdom contamination
KE723964.1	cross-kingdom contamination
KE727351.1	cross-kingdom contamination
PHNK01031567.1	cross-kingdom contamination
PHNK01092757.1	cross-kingdom contamination
PHNK01098813.1	cross-kingdom contamination
PHNK01053023.1	cross-kingdom contamination
PHNK01032126.1	cross-kingdom contamination
PHNK01064563.1	cross-kingdom contamination
PHNK01056631.1	cross-kingdom contamination
PHNK01073491.1	cross-kingdom contamination
KE733925.1	cross-kingdom contamination
PHNK01110378.1	cross-kingdom contamination
JAHHPK010000267.1	cross-kingdom contamination
KE734120.1	cross-kingdom contamination
PHNK01058339.1	cross-kingdom contamination
SSNE01000320.1	cross-kingdom contamination
CCBP010000677.1	cross-kingdom contamination
PHNK01107215.1	cross-kingdom contamination
KE733321.1	cross-kingdom contamination
KE731997.1	cross-kingdom contamination
KE725941.1	cross-kingdom contamination
PHNK01090471.1	cross-kingdom contamination
PHNK01113411.1	cross-kingdom contamination
PHNK01096125.1	cross-kingdom contamination
KE724559.1	cross-kingdom contamination
KE730724.1	cross-kingdom contamination
KE722974.1	cross-kingdom contamination
PHNK01112586.1	cross-kingdom contamination
KE728807.1	cross-kingdom contamination
KE731271.1	cross-kingdom contamination
KE731270.1	cross-kingdom contamination
KE732679.1	cross-kingdom contamination
PHNK01040435.1	cross-kingdom contamination
KE728410.1	cross-kingdom contamination
JAHSQG010000045.1	cross-kingdom contamination
AMCV02000075.1	cross-kingdom contamination
KE725029.1	cross-kingdom contamination
KE727653.1	cross-kingdom contamination
KE727941.1	cross-kingdom contamination
KE729605.1	cross-kingdom contamination
PHNK01105610.1	cross-kingdom contamination
ABRE01010494.1	cross-kingdom contamination
PHNK01043278.1	cross-kingdom contamination
PHNK01058105.1	cross-kingdom contamination
MCBS01009885.1	cross-kingdom contamination
KE724551.1	cross-kingdom contamination
KE728423.1	cross-kingdom contamination
KE724126.1	cross-kingdom contamination
KE729537.1	cross-kingdom contamination
SSNE01000324.1	cross-kingdom contamination
SSNE01000340.1	cross-kingdom contamination
PHNK01082810.1	cross-kingdom contamination
KE727806.1	cross-kingdom contamination
KE729724.1	cross-kingdom contamination
PHNK01112042.1	cross-kingdom contamination
KE733693.1	cross-kingdom contamination
PHNK01112035.1	cross-kingdom contamination
KE729463.1	cross-kingdom contamination
PHNK01091802.1	cross-kingdom contamination
KE727819.1	cross-kingdom contamination
LAEV01000580.1	cross-kingdom contamination
LAEV01001743.1	cross-kingdom contamination
LAEV01000556.1	cross-kingdom contamination
KE722883.1	cross-kingdom contamination
PHNK01073082.1	cross-kingdom contamination
KE722890.1	cross-kingdom contamination
KE724523.1	cross-kingdom contamination
KE734632.1	cross-kingdom contamination
KE725930.1	cross-kingdom contamination
PHNK01079474.1	cross-kingdom contamination
PHNK01045698.1	cross-kingdom contamination
MCBS01007420.1	cross-kingdom contamination
MCBS01000231.1	cross-kingdom contamination
SSNE01000358.1	cross-kingdom contamination
KE728995.1	cross-kingdom contamination
KE728097.1	cross-kingdom contamination
KE734081.1	cross-kingdom contamination
PHNK01029950.1	cross-kingdom contamination
LAEV01001143.1	cross-kingdom contamination
PHNK01092853.1	cross-kingdom contamination
PHNK01057464.1	cross-kingdom contamination
JH993682.1	cross-kingdom contamination
KE725990.1	cross-kingdom contamination
KE724973.1	cross-kingdom contamination
KE725885.1	cross-kingdom contamination
KE724724.1	cross-kingdom contamination
KE726958.1	cross-kingdom contamination
KE730487.1	cross-kingdom contamination
KE731880.1	cross-kingdom contamination
KE730364.1	cross-kingdom contamination
SSNE01000291.1	cross-kingdom contamination
MCBS01016179.1	cross-kingdom contamination
LNQT01002397.1	cross-kingdom contamination
KE728621.1	cross-kingdom contamination
KE728622.1	cross-kingdom contamination
KE727731.1	cross-kingdom contamination
PHNK01057603.1	cross-kingdom contamination
PHNK01101388.1	cross-kingdom contamination
KE724785.1	cross-kingdom contamination
KE730268.1	cross-kingdom contamination
KE727935.1	cross-kingdom contamination
KE731484.1	cross-kingdom contamination
PHNK01073418.1	cross-kingdom contamination
PHNK01066984.1	cross-kingdom contamination
AWVX01000513.1	cross-kingdom contamination
KI569037.1	cross-kingdom contamination
KE729006.1	cross-kingdom contamination
KE723193.1	cross-kingdom contamination
KE727916.1	cross-kingdom contamination
KE727917.1	cross-kingdom contamination
KE728429.1	cross-kingdom contamination
KE729293.1	cross-kingdom contamination
KE730573.1	cross-kingdom contamination
PHNK01078834.1	cross-kingdom contamination
PHNK01106913.1	cross-kingdom contamination
KE732666.1	cross-kingdom contamination
ULHA01000009.1	cross-kingdom contamination
ULHA01000024.1	cross-kingdom contamination
ULHA01000036.1	cross-kingdom contamination
ULHA01000008.1	cross-kingdom contamination
ULHA01000017.1	cross-kingdom contamination
ULHA01000035.1	cross-kingdom contamination
ULHA01000018.1	cross-kingdom contamination
ULHA01000042.1	cross-kingdom contamination
ULHA01000032.1	cross-kingdom contamination
LT795063.1	cross-kingdom contamination
PHNK01071810.1	cross-kingdom contamination
KE733169.1	cross-kingdom contamination
KE731731.1	cross-kingdom contamination
PHNK01113649.1	cross-kingdom contamination
PHNK01061340.1	cross-kingdom contamination
KE733746.1	cross-kingdom contamination
KE727782.1	cross-kingdom contamination
KE723499.1	cross-kingdom contamination
PHNK01116171.1	cross-kingdom contamination
ABRE01010497.1	cross-kingdom contamination
ABRE01006993.1	cross-kingdom contamination
PHNK01112129.1	cross-kingdom contamination
PHNK01081640.1	cross-kingdom contamination
KE732373.1	cross-kingdom contamination
KE726110.1	cross-kingdom contamination
KE731310.1	cross-kingdom contamination
KE729010.1	cross-kingdom contamination
KE733551.1	cross-kingdom contamination
PHNK01028774.1	cross-kingdom contamination
[truncated: 2,016 more rows]
