# Supplementary material for: RAPiD: a rapid and accurate plant pathogen identification pipeline for on-site nanopore sequencing
Source: PeerJ. 2024 Sep 25;12:e17893. doi: 10.7717/peerj.17893 (PMC11438431; doi:10.7717/peerj.17893)
Supplement: Supplemental Information 4 [file peerj-12-17893-s004.xlsx]

## Sheet: Tabelle1
Supplemental Table S4:
Mixed mock community:	SRA dataset
Bipolaris sorokiniana	SRR9334012
Burkholderia glumae	SRR12132997
Colletotrichum fructicola	SRR10988456
Erwinia amylovora	SRR11557542
Fusarium graminearum	SRR15023656
Fusarium oxysporum	SRR21380750
Pectobacterium carotovorum	SRR11435198
Phytophthora infestans	SRR11592935
Phytophthora sojae	SRR10836974
Pseudomonas syringae	SRR13414003
Puccinia graminis	ERR4189663
Puccinia triticina	SRR14386299
Pyricularia oryzae	ERR6018700
Spiroplasma citri	SRR11536473
Xanthomonas citri	SRR11234625
P. syringae pathovars mock community:	SRA dataset
Pseudomonas syringae pv. pisi str. PP1	SRR8754885
Pseudomonas syringae pv. lachrymans str. M301315	SRR7690597
Pseudomonas syringae pv. actinidifoliorum ICMP 18803	SRR15647452
Pseudomonas syringae strain:BIM B-268	SRR13414003
Pseudomonas syringae USA011	SRR12282614
Pseudomonas syringae strains (DC3000, T1, 642, and B728a)	SRR10431754
Pseudomonas syringae pv. tabaci str. ATCC 11528	SRR9943113
Pseudomonas syringae 35-1	SRR16027114
Fusarium spp. mock community	SRA dataset
F. proliferatum
F. commune
F. redolens
F. algeriense
F. tricinctum
F. incarnatum
F. coffeatum
F. clavum
F. culmorum
