# Supplementary material for: RAPiD: a rapid and accurate plant pathogen identification pipeline for on-site nanopore sequencing
Source: PeerJ. 2024 Sep 25;12:e17893. doi: 10.7717/peerj.17893 (PMC11438431; doi:10.7717/peerj.17893)
Supplement: Supplemental Information 5 — List of representative genomes of 190 plant pathogenic bacteria, fungi and oomycetes used in constructing the non-redundant database [file peerj-12-17893-s005.xlsx]

## Sheet: Sheet1
Supplemental Table S5:
Sample	DNA concentration [ng µl-1]	Base pairs generated	Reads generated	Reads passed quality filtering	Detected pathogen	Hits	Normalized alignment score	Mean per base identity
Wheat	4.5	68731568	37565	16027	Puccinia triticina	303	77.48	95.37
Tomato	7.7	111216526	117610	27853	Alternaria alternata	2	89.44	97.6
Apple	12.2	192554982	88581	46039	Venturia inaequalis	3	87.19	96.63
