# Supplementary material for: RAPiD: a rapid and accurate plant pathogen identification pipeline for on-site nanopore sequencing
Source: PeerJ. 2024 Sep 25;12:e17893. doi: 10.7717/peerj.17893 (PMC11438431; doi:10.7717/peerj.17893)
Supplement: Supplemental Information 6 — BLASTn hits with closest reference match, percentage of identical positions, alignment length and evalue are provided for each sequence. [file peerj-12-17893-s006.xlsx]

## Sheet: Tabelle1
Supplemental Table S6:
Positive hits in wheat sample:	closest reference match in BLAST nt	species	percentage of identical positions	alignment length	evalue
TAGCTGCTCAAAGACTTACAATCAACACAGGGGATCTCCGGTAAGTTACCCCACTATTACCGTCTTCATGAGGAGCCATGTACTTAAAAATTGCTTGGGGATGAAACAACGAGCAGTCCAAACTCTCCAAGGGTTTCGTTAAGTACTGGTCGTTTTTCTCAACCTCTGTTGATAACCTTAAAGGCTGATCCATCTATGCTGAAAGGTTGTTCAAGTGCGTAGATCAGTTTCCAGCTGGAGGCTGATGAATCCTTCTAGTCAAACTGAAATTATCAATAATGCATCCTTAGACACTTTCGAAGCACTTCGACCAGCATTAATGCGATGGTGTCATTACCTAAGGCCGGGAAAGCTGACTTGAAGTCAGAGGTCCACAAAACCGGTGAAGGCCTTGATCTG…	CP110439.1	Puccinia triticina	94.235	2255	0
TAAGGTGAACCGTGAAAAGTAAGTATGGCGGATGTGATTGGAATGGGAAGAAACAACAAATGATATTATAATTCAAAATTTAGAGGAAAAAAGAGTTAAATTAGATAACCTAAATGAGTTAATGCATGCCACTATTTTTGTCAATCTTTTTCTCACCATGGTCTTTTCCTCATAACTTTGATGCTCTCAGGAGCATGAACAACAATAGTATCATCCTGTTCGTTTTGGGTAGCTGTTTGGATTTGCATGGAGATCATCTGGTTGATTGGTGGAATCACCGGGATCTCGTCGCTGGCTATGTTGCTCGTCTTGTTTCTTCGTTTTATACTTTTGGAGGTAGTTTAGTCGGCACTTCTCCCTCTGCGTCAATCACTGGAATTTGAGATGGGGAAGGAAAAG…	CP110421.1	Puccinia triticina	97.232	2457	0
TTCATCGCTCTTGTAAGTTCTCATGCGCACACTTCCAAATACTCTCTCCACTCGAGTATCACAGACTATCCACAAAAACTAGAAACAAGTCACACAACACGTCCACCGAATATCAGAGTCATCATTTCATCCCGAGGGACAAAGTTCGCCAAATGCCGGGCAACGTGTTGAGCAGTTATTTCGAGGTTCTGGAGTGGGCTTGCTCCGGTTGGGAGGCCCCAGAATGAGGAGGCAAAGGAATTCGAAGAAGTTTGGGCGTTTCTGAATTACTCCATTTTCCTCCACGGTTCTCAATTAAGATCTAGGAAGACTGGAGATTCAGAGCCTGAGGCCCAAAGGCAGGTTGGGAAAGCCAACGGCTTCCCACCACCTGACTGAAATGAAGTCTGAAAGCCAGAG…	CP110439.1	Puccinia triticina	96.205	1133	0
AGTAGCACCTCCCCTTCTTTACTGGTACACACTGGTCATCGAGAGGTGTGACTGATGACCCTGAACTGTGTGGTCATCGAGAGGTATGAGTCCTCTGGATCACCGGTCGTTACCCTCAATGACCGGTCCAGACCGGTCATCGAGAGGTGTGATGTCTGTGGGCACTCCAAAAGGAGACTTGAGTGCACCCCAATGCACTCCATTTGGTATTTGCTAGCTGGAGTGCAAAGCCAAATCCTTCACTGAAAAGGCGGAGTGCTTGGGCTTGCACTCCATTTTTTTTGGAGTGCATCTAGCTGCATTCCCCTATTTTGGTCAATTTTGGAGTACCCAAGTCCTTGTGCACTCCAAGAAACATGGAGTGCCCATCTGGGGACTCCATGTTTTGGGAGTACAAAA…	CP110439.1	Puccinia triticina	94.603	1649	0
ACGCAGAGCAAAAAAGTTCATTTGGCTGAGAGGCTTCTAATTTTTTATAGCCCCTCCCCAGCATCTTCATGTTCTTGCGTGAGCAGTACCAGCCAAATGGCTGCAAAGACCATAAAACCCCTCAGATGACCTCCAACCCCTCCAAAATTTAAGAAGCAGATGGATCCTTGAGAATCCTGATGATTTCCTACATATTCTGGAATTTTACAAATTTGAAAAACAAGCCATGATCAGGTTAAACTCACTTGTAAACTTTTCCAATAGGGAGGTTAACAATTGAAGAGGTCCAAAACTTTAGAGCAACTTCACTGCGTGAGCTTTCTGCGGTGTAAAAGCTTGCCATGTTTAAGCTCCAGACTACTGCGGTCACCTGCAGCATCCACTGCACGGGAGCTATGC…	CP110421.1	Puccinia triticina	96.54	3642	0
TTGGCTCCCATTTGCACATTGTTGAGTATCTCAATAGCTGTGAGGCTTCTACACCCAAAATGAATGCAGAAGACGGAAAGATACACAACAAGATGTCGCTCAAACCCCTGATTCAGTTCCATGACTTGATAATCGACATATTCATCACTTACTCAATCATAAGAGGGTGCTGCGCTTGCCAACGCTGAACCGGACACACCTTCTGCTGAAAGTCAAGGCCTAGTTCTCCATTAAAAGAAGGAACTCGACCAACATCGCTCACGACACAATTATACCCCGTTCTGCCTCTACCTTGTGGCCGGCGTTTGTGGCCTTATTTTGACTCCTAACAATCGTCAGTTTGCCTCCGTTGCATCAGCTTTGGGATTCTTAGGGTGCCATCAAACACATCTTCAAAAA…	CP110439.1	Puccinia triticina	98.691	993	0
CAACCAAGAGACACAAATTATTGATTTTTGGTGGGGGAATAAAGCTCCAAATCTCTGAAAAAAATCTGCATGTCCCCCAGATATTAATGGCAAGTTTACCCATGTGCTTATTTCAAAAGCTTTGAAAGACCTATCACAGTTTTTACCAGGTGGTAAACACAGGATGGGCTGAGTATAAAAGAAAGCATAAATATCCTGACTGAATTAGAGCTCAAGTATTTATTTTGCTGGTATAATAGGAAAATGATGATTCATTTGCATTGTGTAAAACTGCTTGATTAAAATGGGTATCACTGATAGGTAAAAGCCCCCAACTGCCACCGGTGTAAGACTTTCAAAAGTGGTAATGAAACCCTTTTGCTGAATGGTGAAGGGTATGATGGAGTTGCAAGCTCTGCC…	CP110421.1	Puccinia triticina	95.714	1610	0
GTAAGGCTCTTCCCGAGGTATGTTTTGTTTTCTGTATTGCGGATGTTTATCATTTAAAGGAAACTGATCGTTGTATTTCCTAGACGCCTTGTAATGATGCGCCTGTGAGCCGCCAACCCATTTGTCACGTGATCACTTGAACTGGACCCAGGACCAGCGCTCATAGATCTCTCAAACTCGCTCATGATGTCTCTCATCTGCCTTGAGTCCCCAGTGGCTCTTCAACCATTCATTTGTTGGTGATGCAACGATCCAAACTTTAGAGACGGTAAGGTCTTTCCTTGTCTTCTTTGCCATCCTGCCAGCTGACCTTGTCTTGTATAGTTCTTGGGTTCTAATAACAGTGAACTGGCCCCGCCCATTGACCAAACTCCGCTTGGCTTGACGTCTTCTGCAGCT…	CP110421.1	Puccinia triticina	94.739	2851	0
GCGTTGCCATTGCTACTCAGATATTGTTGCTTCCGCTGACTCGTCTATGATCGAGCACTTGGATCCGAGCCCTCGGAGGCCCCTGGCTTGTATTATAATGCTTGTATGACTTATTTATGTTGTAGAGTTGTGTTGTGATATCTTCCCGTGAGTCCCTGACCTCGACGTACACATTTGCGTGCATGATTAGTGTACGGTCAAATCGGGGGCGTCACAAGTTGGTATCAGAGCCGACTGCCCAGCACCCCCCTTCCACACTCCTTGGCTGAAGTCGAAGCCAGACATTGCAAGTTTTACTAACATGGCTGTGCGGCTCACGGGCCCACGTCGCCATTGGGTGTTACTAGGATCTTTTACTCCTTGTCTATACTCTGGGACTCTGATCTCTCTTCTATTCGG…	CP110439.1	Puccinia triticina	96.016	2535	0
AGCTTTATAGGAAAACACATGAAGATAGTAATTGGGTTTGCCCCCTTTGTCTTCTTTCCATTGATAAACAGATAACAAAGAAATATGGATGTCACTGTGTTACCTGTGTACTTTTGTTTACCAAACAAGAGTTGAAAACCTGGATGAATCATTGAAGATCTCAAACATCACATTGATCTATTCCTTTATCATGTGCTGAGTATGACTGCACAATGGGTCAATAAGCCAAAGTTCCATATGCTCATTTCCAGAATCAGTCAGGCGGTTTGGTCCACCCTGCTTGTTTTCTTCTGAAAAGTTTGAGGCTTACAATGGAATTATGAGAAATGCATCAATTCACTCAAATTGACAAGCTAGGGGAGGGAAATTGCCACAACGTTCTCTGATTAAGAAGCCATG…	CP110421.1	Puccinia triticina	95.85	3783	0
TAAGCCCGATCGGGGTTTACCCGATGTAGAGCCCGCGCATCGGGGCCCCCCCTTGTTCAGTTGTGATTTTCTTCAAGGAGGGCATCAAGACCACATTCGAACCCTTTTAATTAGCCCCAAGAGATTGCGTCGCGTGAAGATTGGAGTCCAGGACTGGTCCGGCCAGTGCCCGTTTTCTTCTTGATAGTCTGTTCGGATCTCCGACACTCTCATGATTGACCCCTTCACTGACGCTTGATTGTATATACCCTCCTTTTTCCCAATCGACTCCGAAAAAAAACCCCCTGAAATCTTACCCAAGAAATTGAAAGTGAACCTGAAGGCTGACTTGGATAACCTGACAGATCTGCGAGTCAAGGATGCGATGCACCACCGGTTTTCTTCAAGTTGGTTTCCTCG…	CP110421.1	Puccinia triticina	96.093	4326	0
GGTGATTGGCATCTTGGATTTTGAGACAAGTGCTGAGGAAATTAGAACCCAAAAATCTGTCAACTACACGGTCTTTATTCCCTGGATTTGGTATATACCACTTACATGTTGTGACGGGGGAAGAATCAAGAGTGGTGGGGTACTGTTGTTTATGACAGGTCGGGTGCGGTTTTTCAAATTTGAGGTGAGGTCAATGGCCGGTGGTGTGATGTCAGTCCTTAGCCAGGGATGCAAGACGTAGGTGCGGCCAGTGTGGTGTGTGTACCGGGGGAGTGATATGTGGATGGGTGGTGGGGGGCGTGATGTAACTGTACTGTTCTCACCGGGCTGTACTATGATGGGCGATGGGGCCCCCGGGGGGGGGTTGTAGGCAGCTCCGTGGTCCAATTTTGATCAAGT…	CP110453.1	Puccinia triticina	90.926	540	0
ATGTCCTGCTTGGTAGAACATCGTATTGCTGATTCATGTGGACAATTGGCATACATGGTGCTGATTTATTTTTATGATGATAGCTTGATAAGGAGGTAGAACACACCAAACCCAGAGCATCAAAATCTTGGTGAGTTTGTTCTTTGCTTGACAGGGACACCTGTCCAAAACCGATTGACCGACTTGCAAAGCTTGATTACGCTGTTGAAAATACATCCATGGGATGAAGAGTGGGTATGGAGGAGCTGTCTTATCCTCGAATGAACGTTGATCTGGAAATAGAAGACCTCTAAGCCAACTCATGGAAGCTGTTTGCTTGAGAAGAACAAAGGATGTTCTGTTGAATCTCCCCGAGAAAGTAGAGAAATTCATACTTGTCAAAATCAGCTCGGAATGGGA…	CP110439.1	Puccinia triticina	91.713	5032	0
ACACAGTACCCATCGCATTCAATTCATCCAACAAGGTCTTCATCTCCGTCGCCACCCGTGCCGGATTCTGGGAGACGTCCACCTCCACATTCCGAAGTTGCTGCAAAACCCCGACATCTTCGCCTTTGTAACGCCGCTGAACCTCGCCTTGATTGCCTTCAACATATCCCAGGAATCTCCCCAACCAAGCTCGTTCTTCATGAAGGATTCATTACGCCCAAGATGATCCTTCGCCCAACGCTAACCATTCGCGGCCGAACACAAGGTCCGGAAAAGAGCTTGGTCGTCCAAACAATCCGCACCAATCCCCATCAAAGCTTTTAACCAAAGCATGTAGTTAGATCCATCCGGCTTTAAACAATTAGACTCGCCGATTTCACCAGCCCATTAACCGCGCGT…	CP110439.1	Puccinia triticina	94.485	1088	0
AGAGGAAGAAGGTCAAACAAAGTTAAAATAGAAAATAGTCCAACTGGGAAGGTCAAGAAAAAACTAGTAGTTCCCTGTGTTTGATCACATACACTATGGGCAACGGTGAAACCAATACAATACAGGTATTGGTATCACATTGGGTCTGGTTCCACAAATTTGATTCTCTATTGGATTGGGTCACCAATACAATCCAATACATGTGGATCTGGTTGCCAATATGATCCAATCTGATTCTATACATTGTGGATTGCTGGATGGATATTTGTATTAGGCCCCAATTACCCTAAGAAGAGGTGTTTTTTTCAAAATACAATACCAACTGTATCATATCTTTTTTTCAATAAAATACATGCTATAAAATTCTTTTGTGTCAAAAAAATATACAATACACTGTAT…	CP110439.1	Puccinia triticina	96.784	3141	0
GATGTGCCCTCATGTCGCTTGTTTACTTGCACACTGCACCTTCAATTGTCTTTACATCCCCCCTCAAAGCAGTTATGTTGTACATTGAGGCAACACTGGATCATCTGTTGATAAATGTTTGCAATCAATTTTCATCTTACCTGACAAGGAAGTTTGAGACACTGCTCAGAATTACGTGTACAGGTACAATACACAATGTGGCCCTTTTGGTCAGTGTAGGCATCCTTGTATGAGTGCTTATGTGTCCTTTGGAACATTCCACATGTCGGACATAAAAATGATTTCCAGTCTTCACCTCCCAGATCGATTGAACACATGCTATTAGTATTACACTACGGTTTTGAATTGCTTTCTCCTATCAGAACCGCACACAATATGGGAACATTTTTGGATGTTAGT…	CP110421.1	Puccinia triticina	96.331	6159	0
AGTTTGGTTTCTGATTCCTTCCGTTTTTATTCTGTTTTTTGACTTGCTGAAGTTGAAGAGCTCAGCGACGAGGCTCATATCGAAGGATTCCTCGTACTTCATCACAAGATCACACTGCAGATTTTTTTTTCTCAGGGGAGGAAGCTTCATTGCGAATCAGTTCCGGCCAAACTCCACGGACAAGGGCGATCCGATTGGCGGTTCCACTCGTACGCAGCAGGAACACAAGGGAGGGGGCTCCTAAACAAATTGGCGCGACCGACCAATTTTGCTGAGCTGCCAGGTTGTCCCAGGTGTCAATGTTGGGACAAGTTTGAGAGACTCGGTCGAGTACGGTAAATGGTTCGAGTCCGCTAGTTGTTACTAGCACTGATGTTGCTCCTAGCACCAAGGCTAGTC…	CP110439.1	Puccinia triticina	96.457	1129	0
GTGCCTGTACTTCGGTTGGTTGCATGCTGTGACCCGCCTTGGGGCTGTCAAGAAGGATCACAAGCCTCCACTCGTCCTAGCTTATAGTCCAACCACGCACCCTCCTAGCTCGGTAGAGATTGATCTGTGATCTCTCCCGAGCTTGGGTGAGCCCAGTCCCCTTCTTTCCTTTTGTTCCCTTCCGTATCGACCTTCTCCGTCCTGTCCAAGCTGTTGTAAGTAGAACTAATAGAGAGATTGATCTGTCATCTCTCCCGAGCTAGCTCCCTCTGCAATTCAGCCCACCTTGGCTCTAGAATCCGGTCCATCCCAGCCTGCCCAGTGAAGAGCCCCCATTCAGGGCTCTTACACTTTTTTTTCTTCAACCAACCCTCAACGCTACCGAGCCACTCGCCTCCG…	CP110441.1	Puccinia triticina	90.446	2826	0
TCTTTCTCTAGTTTTTTTTTTTTTTTTTTTCAAAGTGAGGAGGTGGGAGGTCAAGCATTGTAGAGGAGTTTGCCTGGAGTACTGTACCTTGCAGATGTTGGGCGGAGATGGCAGTAATAGTGCGGGATATTGTCTTGGTGCAGATTTGGGTAGTACTAGTAACAAAAGTGGATGAGTGTGGAGGGGAGGAAGGAGGAAATTTTTTGGGATCTCTTCCTTCTTCCCATCATCTATCTTAATATTCATCATGGTACTTACAACTTACAGATGGTACTGAGAGCATTATAAGAGTTTTTTTGCACTTACAGAGTACGGAGCTTTATCACCTAACACTCATTATGCAAAAATTCAGGCTCACTGCAGAGCGCTGAAAATTAGAAGATGGTAGTGGTACAGATC…	CP110439.1	Puccinia triticina	94.943	1226	0
TAATCTCGGAAGAGGACAGTCTAGTAACATTTAGCTGAACCTTTGATTCTAAAAATTTACCATCTATAATAGGAATAAGAATTGAAATCTTGACATAAGAACAAACATCTCCGGAAACCGCCGCCGAACCATCGAAACTCAATTAAAGATAAAGGCTGAGAAGTGAATCAAGGCAGATCCTGTGAAACAACAAACCAATCATCAATAAAAGAATTCGAAGCTCCAGAATCAACCAGAACTGAAACATCTATGATCTTAGTATTTTTATTTGTGAATACTTTCCCAACGAGGTAGGCCTATTACTTAATTTAGACACCAAAAAAGATCTACGAAAGGGCTCACATTCGTCGTGCTTTTCCTCACCCAACTCCCATCGAACAATAGTTCAGCAACCGTCAA…	CP110421.1	Puccinia triticina	91.897	2246	0
TAATCATTGCTGGAAAGAAAATTACGCAGAACAGTATTCCATGTGACAGGAATGATAAAAAATGAAAAACTGAGACCACTTGCAATGATTTTTGTTGGATCAAATAAATCTGGTCAAATTGGTGTTGATTGCTTAGGTGCCAAACTTCATTTTCAAATGGGTGGATGCCTCATTCACCAAAAAATCATTGAAAATGGTCTTAGTTTTTTCATTTTTTATCATTCCTGTCACATGCCATACTGTGCTCTGTGATTTTCTTGGGTTGAGAAATAACTAGAGGCCAAAGTGGCTTGCTGTGCCGCTGCAAGGGCCCAAGGCCACTCAACCTCGATAGCTCACAGGGCAGACCTTCTCCGCCAACCCCACAAACCCCACCTCAAAAAACATTAAATATATCCC…	CP110421.1	Puccinia triticina	94.302	1913	0
ATAGCTGCTCAAAGACTTACAATCAACACAGGGCATCTCCGGAAGTTACCCCACCTCTCCCCGTCTTCATGAGGAGCCATGTTGCTTAAAAATTGCTTGGGGATGAAACAACGAGCAGTCCAAACTCTCCAAGGGTTTCGTTAAGATACTGGTCGAGTTTCAACCTCTGTTGATAACCTTAAAGGCTATCTATCTACGCTGAAGGTTGTTCAGTGCGTAGATCAGTTTCCACTTGGAGGCTGATGAATCCTTCTAGTCAAACTGAAATTATCAATAATGCATCCTTAACACTTTCGAAGCACTTCGACCAGCATTAATGCGATGCGGTGTCATTCCTCAAGGCCGGGAAAGCTGACTTGAAGTCAGTAGGTCCAAAACCGGTGAAGGCCTTGATCTGAA…	CP110439.1	Puccinia triticina	94.735	2298	0
TTTACAGTGACATGCGCGCTTGGCAGTTGTCCATGATAATGGGGCATCCATTTCTGAGCATACACTCACGTACCACTGGCATTCAGCAATGTGCTCGAACTGCGAAAGATCACCAGACGTTTCTGGGTATCTAAATAGTTTGATCGGATTCCGAATACTGTACTGCAGGCTACGTCATTCGTGAAGGGTTCTATTCTAATTATTTATAGATTTTGGATGTATTTTGGGCCGGGCGGCTTTGCTTGATGATGCACGGCTTCAAAAAAGAAGAGCCTTCGTGGCTGTCGGCTGGCCACGCTGCCAAGCAGAAGAGATGTTGGTTGATGGATTGGTGGTGCGGGCCATCCTGATGGCATTGGATGAGAAGTGTTCCCCCAGCTGCCCGCCCAGCCCCGGGTG…	CP110421.1	Puccinia triticina	92.57	1669	0
CTTCATTGCTCCCACCCCCGCTGAATGGGTGCAATTGAGAAATATGCAATACTTTGGGGATTTTTCAGAAGGGTGAGTATCTCTTTCAGTCAGGATTAAAAGAAAGATCAAAAAGATCAAACATTAACTTCTTCTCTTCCTTATTTCTACAAAGCTACTGCGGACCTCTCTGGTACTCGATACCCAACCTTGAACTTGGTCTTGAGGATAATGAAAAATCTGGAAAATACATCAGTAAAGCTCAAAGATAAAACACTCTAAAATAGATAGAACTCTCTGCCAAACCTATGCTTGCAAAGATCAACAAATATTGGCACCACATGCAAAATTATGCTTCCCTAGCAATAGTTTTTTGATCCACAATAAAAACTTGACTTCATCTATTATTACTCTTGCAAC…	CP110421.1	Puccinia triticina	94.107	1629	0
AAACATATTGTAGCACCTAAGGAAACTAAGCTACCAACACATAATTGTGCCCTCATATTCCCTCATGCCATGAATAGCTAGGTCACAGGCAATCCTAAATCAGAGAGTTGATGATAATTGGGAGGTTGAAGACCAATCTATAAAGAGGCGTAGAAAAAAATGTTGATTTTTATTGAACTTGATTCAGGTGGGTGGGTGGGTACTGGGTAGGGTGATCCTCCTAGGGAGGGAAGCCGGGGAGGTGTCTCAAGGGAGATGAAGAGTGGGAAGTCTGAGAGATTTGAGGGCTGCATAAGGGCCAAGTATGTGGTGTGAACTTCACACCACATACTGAAGGGAGATTAAGCACAAGACTATAGGACTGAACCTGAAATCTGCAGCGGCGAAGCCACCTTGGCC…	CP110421.1	Puccinia triticina	95.427	5467	0
CCACTACAACACAACTCCTCCAACTCTTTTTTTTTTGAATGAAGAATAGGAATGTTGTCTGTAGTGCAGCTAGTTCTTGGTTCATCCTCTTGACCCCAATTGAGGTACTCAATTGGATCCATTTTGATGGAAGATTTGCTTTTTTGGGTTGGCAGATGAGCACTTGTTGCCGGTTTCACTACCTGGCAGGCCAAATCCACCCGGCTTGGTTTGGACAGCTCCATGATTTGGAACATTGTGAAAGATCTGTGAGAGCCTAAGACCCAGTCCAGGCCATTGCACTATGCTGACTGTTAACATATCAAATATTTTTTTAATCCACTAACAGCTTGGTGTTAGCTGTGGCGTTAAATCCTGCTAACACTTCAAAACAAGGCCTCTGTTAGCACCTCTACGCTA…	CP110426.1	Puccinia triticina	91.712	2184	0
CTGGCGAGTCCGCTGTGACAAAGCCTGGGACACCCATTATGTGGTCCAGGGCCGCCCAGGGTCTGCGCAATCCCGGGACCTTGGAGATGCTGCTTCTTCCCGGCCATGTGCAGCCGCCATTTTGACCGCACCACTCGTTTGACGTCTTTGAGTCATGTATTGGTGGGCTGGGTCAAAAGGTGGTTTGTCTGGGGTCATTTTGACCATGAATGGAGGACTTCCCGTTGCCTAAAAGGTTTGATTTAGAGGAGGCCGCTTAGACCTTATTTGCTGGTGAAAACTTGATATCAATGAGTTTTCACCAGCCAGTAACTTTCCTCTCTGCTGCTAGATTAAGCATTTTAGCCAACAGGGAAGTCCTCCAATGCTTTGTCACAGCCCCAACCGCTATTTGATGGG…	CP110443.1	Puccinia triticina	93.93	4135	0
GTTTTATGCATCACCCAAGGGCAAGTGAATGTAGCATCAAACCACATGGACTATATCATTTACAGGGATGCTGAAATCTACAATTGGTTTTTTACAACTCAAGTAATACTAGCCCAATATGAAATGTGCGGCAAAAGAATGCCTTGTATTATGTAAACAGCCCAATGCAAGAGAGGCATTTTAAAAATGCTGCTGCAATTAGAAATGAAATGTGTTGGCAATGACATGACATGTCATCACATCACTGACTTTTTCCAATTCATCAACTTCTTGCTTCTGGAGATTCAATGGCAAAGAGCATACAAGTGTATGTATACATAGCTCACAAGCCTCATTTTGTTGTTGAACTGTCCAAGGATGGTTCTTCATGCAGCTATCAGGCTCTGGATTCCAACTAAA…	CP110426.1	Puccinia triticina	92.851	5651	0
ACGTTTTTTAGGTTCAGAACGAGGTCCCGAGCGATCAATTATCAAGCTACTCACCATTCTGTTCCTGCATCCGTCTTCGACCAAGGTTAGAGACTTACTTGGCTCTCAAAGCCCTTCCTAGAGTTATCCGATCTGAGGTTGCAACGGCCAAAGTGCTTGTATGCTCCCAACTTCTGGATCGATTGGACCAACTCATGGTATCTGAGTTTTCTCAAGAAATTTTTGAAATCGTGGAAAACTGCTCATTGACGGACCACCTACTTGGATAGATTCGCGCCCTCGTCACCATCAGACTCAAATCAAACCGATATTGCATATATCACTAGGCTAAGAAGATATAATCAGTTTAATCAACGCAGAGACTTAGAACTTTCTTGGAAGGCCGCTAGCGTATTCCGG…	CP110426.1	Puccinia triticina	92.623	6059	0
GTTTGTCTGCCCCCGGTTGCTTGATTAGGCCCCTCCTTGACAGCCTTTCACAGAGTCTTTCACAACCAGCCCGTTTTTGCTTGTTGCTCTGGCACAGCTGGAGGGTCATCCATAGGGCCTTTGGGTCTTTGGCATATTTTCAACAGCTGTGTGTATTCATCCAAATTGTGTGCTATTCTGTTATGTAATTTCTAAATTCAAAATACGCCAAAACTTATATCTAGGTTGCCACATTTGTGTGGATTTAAGAAACTTGGATTTAGCATAGTTGTTAGTGCCAGCCTCTTGTGTGTTTTGCAACATGCAGGTTGCGGGTTCAATCCTCACTGTTCACCTATCCTGACCTCAGACCCTGGGCAGAAACTGGCATCAGTGAAACTTTATATTAACTTGAGCCCA…	CP110426.1	Puccinia triticina	96.305	1353	0
GTGGCCAACAACATGTTCTCAGACGGCCAGCAGCCACCATCCTCGTCACACATTCTTGGGTGAGATAGCTTACACCAATGGTAAGATTTTCACCTTTGGTCTGGCTCATCTTTTCAGACGGACAAAGCAATGCTAACAAACTGATTTTCCTAATCAAAATCAGATTGGATATACAACGAAACCAATTGGAGGAGTATAGATAAAGCGTGAGATCCAGCGCCATTGTCAATTTATCCTCATTCTCTGATGCTGGAAGAAGATTACTCCCGTAATCCATTTTCACAGGCTACATCTATCGCGCCAGCATGGTGTCAGAGTTATAATCCCGACATTTAATCAAGTAAGTATTTGATAGGTTAAGCAAAATTGATGGAGGCTAACTTATCATGCCAATCAGGA…	CP110443.1	Puccinia triticina	95.384	5004	0
AGATTCAGCTTCTGGAGGCTTCTGGCCGGTAGGTGGTTGATTCGCATCACATATCGACAACGTTTTCAATTCAGAGTTATTGACATTCGTGTTTTCATTTTCAACTCCATTATTTAGGCTGATTGTTGCTGCTTGTCTGTGGTGTGTGAAGGTTTTATTTCACGTGTCTTCGAGGTATTTACTTATACATTATTATTGGTATCAAGTAGACATTCTGACTGTATTTCTTGATTGGATGTATTAATTTTGTTGACTACTTGGCATATTACTGTTTCAATCAAGTAATTGACTCCCCATCATCTTCACATGGACGGCCTTGGCGTCCCCGTGGAGAGCGATACCATGGCAGACGAAGCCATGGAAAGTGAAGTCGAGGATGAGGACAAAAGCGAGTCCTAA…	JQ240472.1	Triticum urartu	91.445	1052	0
GTGTAGCATCTGGTTCAGTTGGTCCTTGTATGCCCCCACCGACTGGGGAAGACAAGAGGAAGGCCGCCCAACTGGGACCCTGCGGGGGGTCCCAATGGGAAGAGCATGTCCTCCGGCACTGTTGCCACCACCGCCAACGAAAGCGAAGACGAGTAGTTTGGGCCAGCCCCAGGGAGATCGTAAGTACTTGGATACCAAAGTTACCCATAGGATTCCTTTGTCGCACTACTTTTCCTAACGCTGAACACAATTGTGCAGGCCGCCCCGAGCCAATATCGAGGTATTGTCGGACGGCTCCCTTGGGCTCGTCGGACATGGATAGCGATCCAGTCCCGACCACCACCTCCCCTCATCCTGCTGATGACGCCGAGGTGTTGTCTCAAGAGGCAGCGTCGACCG…	CP110426.1	Puccinia triticina	93.476	1165	0
TTGTTTGCAAGGAGGGTCGGCGTATGGCGCAAACCAAGGTCAACAAGATCCTTTCATGGCCAGCCCGGTCAACGCGACGGAGGTGCGCGGGTTTTTGGGAGTGGTAGGTGTATGTCCGGATCTTCATTCCTTGCCTGTCTCAGATCTGTCTCCCTCTCCGACGTCTGACACGTAGGGATGCGGATTTTGTTTGGACCGCGGACTGCGAGGAGGCGTTCAATACTTTGAAGCAGCTTGTTGGGCAGGACATCGTCCTCGTCAAGATCGATTACGGGTCCAATGCCGGTAAAATCAGCCTGGCGGGCTCATTCTCAGCTTCCACGCCGTGGGGGGCGGTCCTCACTCAAGAAGACTCCAATGGGTTGGATCGGCCTGCGCTCTACGAGTCTTTGCTGTTCT…	CP110443.1	Puccinia triticina	97.633	1014	0
CCAATTGCAGCCACGAAAAAGATGCAACAACAATTAGAGGACGTCTAACTTGTTTTTGCAGCAATTGTCATGTGATGTGATATGGCCAGAAGTTGTGATGAATGATGAATGATATATTCTTGTGATGTATGATATATCATGTTCTTGTGAATAGGAATCACGACTTGCATGTCGATGTAGATCACAATCGCAGGATGATAGGAGTTGTCTTTTATTTTTGATTAACTTGCTGGTTATCGAAGAACGCCATGTAAATTACTTTACTTTATTGCTAAACGCGTTAGCCATAGAAGTAGAAGTAGTCGTTGGCGTGACAACTTCATGAAGACACGATGATGGAGATCATGATGATGGAGATCATGGTGTCATGCCAGTGACGAAGATGATCATGCAGCTCCG…	CP110434.1	Puccinia triticina	91.93	3730	0
AAGGCTGGTCCACAGCTGAGTGTCAGCTGAGCCAAGGGTGGTCCACAGCTGAGCATTGTCTGAGCCAAGGCTGGTCCACAGATGAGCATTGGCTGGGCCAAGATTGATCCAAAGCTGAGAATCAGTTCAGCCAATACTGGCCCAAAGATCAGCATTGGCTGGGCCAATCATAGTCCTAATCCAGATAAGCTGAGCCATTACTGGACTAAAGCTGAGAATCAGCTGGGCCATGACTGGTTCAAAGCTGAGCGTGAGCTGGGCACCAAGCTGAGCGTGAAGCTGGGCACCAAAGCTGAGAATGAGCTGGGCACCAAAGCTGAGCATGAGCTGGTTATTAGGACTGTGCCAAAACACACTTTGTTATTAGGAGTGTGCCAAAACACACTTCGTTATTAGGAG…	CP110426.1	Puccinia triticina	96.345	3995	0
AAGTTACCTTTGAAATACAAGCATCTGCTGTTTATTGTGGTGAGCCAACTCCTTAAAGTGATCCCTTATTCAGGTCCTCCCCGGCTATGCACTTATTTCCTTGGAATCACCACTCTTGGTCATATCTCTTTGTAAGCGCCGTTTGCAGTCACTACATATGATCTTAAGTTCTGAACCGCGGCCCTGCCGCGGCTTTCCTAGTCTTTGATAAACGACAGCGAATCTCCCGGCAAGCCAATTGCATTGATCCAAATAAGACCAGCTCCTCTAACCAAACCTGATCTACCCCTCTACCCAACTTCGCAGATAGATCTATCCAGCAGAACTGCCAGCAAGAGAGGCTCTCTATGCGAATGGCTGGCGCCCCCCTTCCTGACTGGCAGTCTGTAGAGTCAGAAT…	CP110426.1	Puccinia triticina	94.545	1760	0
CTTTGAGCTGACAGACAACTCGTGTCAACTGTATAGACTGGCACGGCAAAGATTCGCAATGCCTTTGGAGGAGGAGAAACAGTAGAAGGAAACGTTTCATTCGGTACACGCACGAAATCAGCATTCCAAGTTTGTCACTCTCCCCTTCTCTTCTGGACTTTCTTCGGCCCCCGACGCCTCTCTTCCTATCTATCTAAGGCAGCGTTAAATCCACACCCCTGTCAATGCTTCACCAACAACACGATTCGATTTCTCAATGTTTTCGGCTCAACGGGACCTGAACTATTTCGCTAGTTGCAAACCTCACCCTTTGAGGAACCAAGGAGCCTCTTCTGAGACCTCGCGTTGTGTACATCTCTTGTTATTTATATCGTTCCCCTACTACGGTGTTGCTGACCC…	CP110426.1	Puccinia triticina	96.321	1984	0
GTTTTCTGGCCTACTTGGTTCAGTTACGTATCTAGGGGGAGTTAGCCAGGAGCACTCTGCGTACTGTAGGAGAGGCTTTGTGTTATCTCTCAATTCAAGCATGAGCAGAAAGTATCTGCTACACCAAAAAGAAGATGGAGTACAATTCAATAGACAGAATTGTAATTATTTATCCTGGGAAAGAATTGAGCCACTCAGCTGTCTTGTAGCCAGAAAACCATTTCCTTGGAGCCCCAAACCAGTGGAGCCTCATTTGCAAAACTTGCACATTCTTCAATTTTTCAAAGATGATTCAATGTCAATGGATAGTGATAAGAAAATCTTAAGTGCATGCCAAATTGTAGACACAGTAATGTAGCATAATGTATGCCACCAAATCAACTTGTCTCCTGTGTAAAA…	CP110426.1	Puccinia triticina	93.607	1439	0
GATGCAGAGACACATCAATTTTCATACCCGAATGCCTGCACTGCAGAAGAGGTCCAGCTATGCTATTTTACCCTGTCCCAGTAAGTAAATTATACATAAACCTCAAACATTATGTCACCAGGAAAATGACAGCAAAATCATTTGATCAGTGGATTAAGTGTTGCCTCACGTAAAGCATAATTGCATTGAAGGAGGGTGTGCCGCAGTGGAGGCAGCTGTGCCAGTGAACAAGCACAGACAGAGGGCACATCTGTCTGTTATCACATCCAACACACTAATCACAATAGTTATCTGTTGAATGCATTTGCACATCACGAGGCTCAACACCACCGCCAGCTATGAGGATTGCGGCACATGGTTGTTACTGGATCACAGATGATGCAAGCATCACCGAGGGAC…	CP110426.1	Puccinia triticina	95.152	8024	0
ACGTGCTTCTTGTTCCGATCACCGGTGCTTTCTGTCCCATTGCACCGGTGCTTTCTTGTTCCGATCACCGGTGCTTGTCTGATCACCGGTGCTTATTTTTACCAACCATTGTTTCCACAGCTCCAGGATACCAGGATATCATATCGCAGATGGGTTAGAGCACCGGTCAGACGCACTCGGATTACAATGGAGCATCATACCACTAATCTATATTGATGCAATCAACCTTGAATGATAAAGATCCTCTCCAACTGGTGTTTCTAATGATAAGATTCCTTTCACCGGTGTTTCTTTTCCATACCATACCAACTGCCTTTTCCACAGTTTCCAGGATATCTGATACCACCTGGATCAGGGGCACCGCACCCGGGTTACAATCGAGCATCATGGTCACATCAA…	CP110426.1	Puccinia triticina	94.579	1070	0
GGCGTGGGGAGACCCCGAAACCATTGTGCAAGATGGTGGGGAGGTGCGGTCGTGACGGAAATGTTGGCTTAGGTCTGTTATTCATGGAGCCAACACGCAAAAATGGCAGGAAATAAGGTGGGTGATTTTGAGGAGGGCTTGGTACAGAATGACGACGCAAGGATGGACGCGTTAGCCGCAACAGGAGTTTGTTTGAGGGTAGCCCTCACATTAGATAACAAGTATGTGTTTATGAATGCCAATATGATTCCATGAGAATGTGTCCACTGCCCTTTATGTTTAGGTTGGTCATATCCCCAATATGATTCTCACAAGTTCCCTTTATGTTTTAGGCTTGGTTATATCCCCTTGGCTGCGGACGACCCAAATGTTCTATCTGAGAGGGCGCGCGAAAAAGTC…	CP110443.1	Puccinia triticina	95.931	1155	0
GTGTTATGTGCCCTCTACTGACTCATCGTATTGCTGACGTGAATAGTGATGAAAATGAAGATCCTTCAAGTGACAAAATCAACTTCTCGTATCTTGGGAAGCGCATCATATCCATCACTTTGGACAATGCATCAAACAACAACAAATTCATTGAGACCGCCCTCACTACTAACCTTTTGTCCTCTCCAGAAGCTCACATCAAATGACACACATCTTGAATCTTGCGGCAAATGAAGTCCCTGAAGGTCGTGGAGGATTCTTTGACTAAACTTGGACGGTTATCCTACATATACGACCAATCCGATCAAATCTTCAGTGCGTTTAGGATCTCTGCAAGGATAATGATGTAAAAGCAGAGCAAAACCGATCATTAACAACGCCACACGCTTGGAATTCCAC…	CP110443.1	Puccinia triticina	94.691	1036	0
TAGGCCACTCATTGCCAATCTACTGATCCCCGTGAGGATGCCGCACACCCCAATGTTGCCTATGACAGCAGTACGTTGACGAGATTCTGATCTGAGTCATCACTAATTGGATAAAAACCACTAAGATTTGAACCCGCCTCGTTCGCCGTGCTATTGTGCCACAATCCTGGGCCATTAATTGAGCCTAATCCACACAACCAGATCTAATGAGCCACACTTGCCGCATCCTAGAGCCCGACCCCAGGGCTCTTCAGGAAGATTATTTCACCTGATAGCCCAGCTGGCACACATACGTGTCCAGTGGGTGTTACGCAAGGAGAAGATGAGTCTCAAGCAAATTGAGTTTGGACGACTGAAAAAACAATTGGCAATTTTTAAGTTGTGGCTGATTGAATGACC…	CP110426.1	Puccinia triticina	96.383	20765	0
AATTGTAATTATTGTCCTTGGGAAGGATTTGAGCCACTCAGCTGTCTTGTAGCCAGAAAACCATTTCCTGCAGTTCCTAAACCAGCTGACCCTCATATTTGCAAAACTTGCACATTCTTCAATTTTTAAAAGATCATTCAATGTCAATGGATAGTGATAGAGTCTTACAGTTGAAATTGTATATATAGTAACTAGCATAATGTACCTCCCAGCCAAATGGACTTTCTGCTCCTGTGTAAAATTTGTGATAATATGCAGTTGCTGCTGCCAGCCACAGCGCCACCAGAGGGGACTCTGTGTTAAGTTAAAAATTGGTTTTGGAGTGTTTTACATACCAGCTAGCTCAACCACAAGATCATCCAATATCATACCGGTCTCAGGTGAACTTAGCACAAGCTA…	CP110443.1	Puccinia triticina	90.026	4181	0
CTCTTCCCCCATCCGACCACCACCACCACCACCACCACCACCACCACCACCATCAACAACAACAGCGGCGGCGGCCGTGGTGACCTGGCGCTGGATAGCCAGCGCAGGCTGCCGACGGCAGACTGGTCTGTGGAAAGTCCAGGTCCGGTTCGACGAGGACTCGGCGAGCTACGAGGTGCTGGCCGAGGTCTGCGCCGTCGACTCCATCTGCTCCGCGGCCCGGAGAAGGACCTCCCGCTCACCCCGCCCCCGCCCGCTTCATCACCCTCAGCACCATCCGCTCGACCCCTCCATCTTCCTCCTCTCCACCAACGACCACGACTCATCCTACAGTCAGACTCGACCGCGGCGCTTTCCGCCGCCTGGGAAACGCAGAACCCCCTCCCCAAAGCGCTCTCC…	CP110443.1	Puccinia triticina	91.761	3617	0
TCAGCCGCTGACTTTTCATTGATAAACTTCTTCAGGCTTAAGCTTGCCATCTTGTTGATCTATGGACCATTGATCCTACGACGCAGAACGAACCACCAATCTAGTAGCTTGAGCATGCTCAATAAAACCTGAACAGCTTTTGTTTCCTTATAAATCTCTCAACGTAATAATCTGTATACTCCTTCCCTCCCGCCGTAATCATAATGTACATTCTATGTACCTCCTTGTTTGCTATAATTACCTTATCTCGTGCCATAGCAAAGATGTATCTCTTAATGCAATCCTCAGTCTCGGCGCTTCTCTTATCCTGAAGACCTCGTGCCAGTGAGAATGTCCTATTGTGCCTCTGCCTCGTGCACATTATAAGCAGGACGAGGGCTTTCACAGTTCGCCAGTCCC…	CP110426.1	Puccinia triticina	90.963	1173	0
CCCGTCAACTCAGGTTGTTCTTGTGGTATTAACCACCATAAACTGGAGATGATGAGCCAAAGGGGTCAAGTCTAAAAGGTCGAAAAAAAGGCTAGCGAGTCGGTGACAGCAGCTCTTAATCTGTTGAGGCTAAAAACCCTCCCTTTACATTGCTCCTCCCCAACCTCCTCTTGTCTCCTGATACTCCAAATGTGAGTTCCACCCACACTACAACAGAAACTGATCAGACTGTAGCTGCTAAATTTGTGGGTTTTGTGGTCAGTAAAGGTACATAATGAATCTTTTGGGGCCTGCAAACATTTTGGTAACCCTATGACAGCAGGATCCCCACGGTGGGATGAGATATAGTGGCAAGGAAGAACTGCAAAGTAGTCATATTTAGGAACTGATCAGACTGTA…	CP110443.1	Puccinia triticina	96.704	1699	0
GCCTTTCCTCTTCTCATGACCGACTTAATTGGTAATCAAGAGATGTGACTTGACCTCAATGACTGGTGATGACCGGTCATTGAGAGGTGTTATTACCCTTGATCACCGGTCTGACCAATCATTGAGAGATGTGACTCGCCTTTATTACCGGTGATGACCGGTCATCAAGAGGTGTGAGTCCCCTCAATGAACGTGCTTACTAATCATTGAGAGGTGTGAGTCCTCTCAATGACTGGCCATGACCGGTCATCAAGAGGTTTGAGTCCTCTCAATGACTGGCTGTGCTGGTCATCAGGAGGTGTGACTGATGACCTGCTCGGTGCCGGTCATTGACAGGTATGAGTCCTCTGGATTACCAGTCGTGTGAGTTCCCTTCTATGACCGGTCCAGACCAGTCAT…	CP110443.1	Puccinia triticina	92.772	2504	0
TTTTGTGCTAAATGATAATAAGGGGCTGTACCATAGGCTTCAATTTTGCAAGATTGCTACATTGATTTTCCTCTACACAAAAATTGAAAGCAAGAGGAGGGTTCAACTGCCTGAAATTCTTCAATTTTGGTCTCAAGACTGCATTTTGGTGATGTTCAGTTTTAGTTTGAACTAGAGTTCAAGGCAGCTACGCCGCCACACTTTAATTGAGTCTACTTTTCACAGCTCCCCCTGACTCTTTTAGGTATAGAATCACAACCCCAAAGATATGATCTGCACATCTTGGAGTTGCACTGTTTTGTTTATCTCCACTTCAAACTGTCCCCTAATTATACTTGACACTGAGTCTGCAGCATAAAATTTAGTTGTTCTCAGCTTCTGCTTAACTGCTCATCATCT…	CP110422.1	Puccinia triticina	92.41	1647	0
GGAGCTATCCGGTCCTAGATCTGGGACTGGTATGGGCCCGGATAGGTTTTCCTAGTTTAGGACCTCCTTTAGGGCCTGGGTGGAAGGAGCTGGACTGAGCTTGCAGGGGGACTAAATTTGGTATAGTCCCCTGACTTAAGCCCTGGTGATGCTCTCAGGACCCAATCATTGGGTCTAGGACTCAATCAGTGGGTCTTCAGACCCAATTCATGGGTCTCGGGACCCGAATCATTGGGTGCTGAATGCGGATATTCTGCACCACTTGGTCCTAGGCCACCCTTTTTTGAAAACTCTGTGTCAACATGAAGCACCACATGTACACTTCCTTGTCAGGATGCAAATTGATAATTTTTATACGGTAAGAGCACATTTACAATTTGTTAGCATAATATGCTAGGA…	CP110440.1	Puccinia triticina	92.089	2250	0
TGCCCTCTTCTTGGTTGCGAGTTACGTATTGCTGGAGAACGAAGAAATCGATGTCAGGTTAGGCTCGTTGAGTCAGATTACCATGGTGATCATCAATTAATTATGGATCAAATCGTCGAAGCCAAACAGTTAAGTCGATCACCTCAATGTCCTTTTTGACTCAATGCTAACTCCTCTTCTTCCTTCTTCAGTTTGTAACTATGGGGGTGACTGGGATCGTCGAAATCGTCTCAAGGTGTATCAAGCCATGAACTTTATGGCGGTACGAAACTTTAAAGAAGCCAGCCCCTTCTTTTACTCGACACTCTCAGCACATTTACGGCAACCGAATTATTAAGCTACGAGGATTTCGTCACCCTCACGGCAATTTCAGCAGCTCTTCAACGCAAGGGTATTAAA…	CP110440.1	Puccinia triticina	93.685	1647	0
ACCCACCCCCACCATAGCACACACCATACTCACCCCTGCTTCCACCCCAGTCAGCGCATGCACAACCGACCTCGGCCATCTGCGCGAACAGCTCTACCATCTCAAGCGGGAACACACCGAGCTCAAAACACAGTAAGCTGGCCCCCAACGGAGCTTAGCCCATCCAGACTGCTGACAAACAAACAAACAAAAAAGCTATGAGGAAGAGCTCCGCGACCTCCACCTCGACTCGAACAGCGCTCGGCTCGGCGGCCCCCCAACAGCGGGCTCCACCACGACCCCCGCCCCCCGCCCAACCTGCCCCAGGCGAACAACAACGCCGGATTCCCCTCCACCAGCAATCCACCATACCCGGCTCACACGCCCAGCAGCAACAGCAGCAAGCCCAGCAGCAAGCCC…	CP110422.1	Puccinia triticina	94.838	1201	0
TGAGAGGATCACAAAAGGTTGTGCCAGCGTGATGAGAAAGAAATAGGGTAGGGGAACGAAGGATGAGGACATGCGGATGGGGAGAACTGGAGAAGAGTTGGACATGATGACTATATTTTATTTATATTTTGAAGGTTGAACTTGCGAAAGCTTAATCAAAACAAAGAGATAGGTTGATAAAGCAAATGAATAACCAAAGATCACCAAAATTTTATATGTTGGAAATCTAAGGTGCAAATAGCGATATGATTGCAACGTTGTAACCGCTGCGCTGCGCTAGAAAAAGCGGTCATTTAGCGCAGCGCAGCGCTTACACCGCTACGTCCCATAGCGCTAAATTTAGCGGGGTACTGTTGCATCCTGAGGGGTGGCAGTGTTAGCGCAGCGGAAGCGCAAATC…	CP110440.1	Puccinia triticina	93.459	1009	0
TGGAATTTCTCCAGCCAGAGCCTCAGAGGTCAATTTGACTCACAGCACAGCAGTTGTACTGTTGTATTGTGTGTAATCCAACAGTAAAAATGTGGTGCAAACAAGACAGCCTGAGGGTCACAGATTTATGGTGAGGACTGTACAAAATACTACCTGTTGTTCAGTCCAAGATCCTGGCACCTGCACCCACACCCGGCACCGTAGATGAGTACTTGTTGTAAGCCCAAAATTATACCCTACAGGTGCTATGTACTTGCCAAGGAGTACTTTGTGCAATCCCTATGAATAAGTATGTATTGCACTGCTTCAACAGATGGCATGTTTCATGGTTACAGAAGGAAATATGCCTGGAAGTATCTCAATTGCCACAGCCTTGTGTTTTGATGTTAAATCACAGGA…	CP110422.1	Puccinia triticina	97.872	1034	0
TTCACGTTTACATATCATGGCTGCTAGGTTTTTAACTTGCTGGAGATCATGCCTGACCGCAGTAGCAAACCGTATTTCTTGGCGATCTTCTTCATTTTTAGAACTAGTACCACTAGCAGCGGTCCAAGGCTGGAGAAGACCCGAATGAGAATAGATTAGAACAGTACAGAACACAGTACGGGTCATGGACTTGGACATGAGATGAATGCGGCCCTACCTCCAGATGAAGTCTCTTCAACAATGGTGCACCTTCTGCGTACTTCACGCTTTAAGCTCCAATACTTGCAAATCATGTTGATGACAGCTTGTGCACGTCTTCATTTACCTGAGTACTGCATCACACGTTGAAATATCACCTCGGGTACTAATGGTGGCCCACTGGAGCAAGTCTTGTAATAG…	CP110440.1	Puccinia triticina	94.67	2514	0
ACATAATAGATCTTTTCCTCCACCATCTTGGATTCCATCCAAATTACCTGGAATTTCAAGGCCAGAAATTCCATCCATATGATTTCTAGGGTTGCCATTATGCTCATGTGGAATATCTATTCTAGAAAACAAATGCAGAGCTTCCTAGAGAATGGCTTGAAATAAGACAGAGGAAGGTTTTGGAAGAAAAAGAAATCAGGTCAGGATGGAATGAATTAGAAGGGCCTAACTCACTTTGATCTATATGAACAAGATCTTCAACTGGGTAAAATTGATTAGGTTGTATGTGATCCTGAACAGGTAAATCTGAGGGCATCTTCAAGTTTGAATCCAATTGGTTCCAGTATTGTTGAAATTTTGGATGAATATGTTCAAATGGAAACCTGTTTTTTTTGTTGT…	CP110440.1	Puccinia triticina	94.4	11232	0
GAAATGAAACGTATGGAAACTTGGTATGAGTGTTGAGATGGTGTAGTAAAACCTGATACAGCTATCTAAGGGGTGGGACTACTTGCCAGCTGACACATACCCAGAATCATCATCTCTGGCACAGAGATCCCAAGTTCACATCTGAATTCTGGACTGGTTTAAATAGTATGCTAGGAACAAAACTATCCTTCTCCACTGCTTCACACCAGACTGATGGATTAGCTGAGAGAATGATTCAAACACTTGAAGATATGATCAGGAAGGTTTGTGGTATGATCTAGACTTCAAAGACAATGATGGTTACACTCATGACTGGGTTCACTTCTACAAATCCTGGGCTCCACCTGTCACTAGTATACACTCAACCACTTCAAAACCTCCTGCTATTCTAGAAAAAGG…	CP110440.1	Puccinia triticina	91.933	3285	0
ACACATGATCCCTGATGCACCAGCATAACAGTTACATAGTTAGCCAGACCTGTAGTGGCTACATTTCCAGGATTGTCCTTTAGTTATAAAGTGTGTGGACAAGTTTGGTCTTGGAATCACTATTGTTTACCAACCTCATTTGACAGAGTTTTGATGCCAGGGTTTTACTGGCCAGATGTGAGGGAGTGTTCCTGGGATAGCAACCACAAACCTGCCATCAAGAGGAGTGTGCACTCTGTTTAATGGCAGATTTATACCAGCCTTTGAAGTGAGTGCACCAGGGAAGCTTTGGGGGCACTCCCTAGAGGATGCCACAGCTGAATTTGGTGTTAGATTTTTGTCTGAACTGGTGCAGATTCATAAAATGTGATGTTGATTTCTTCCATTGCTTGGAAAGAA…	CP110440.1	Puccinia triticina	92.19	1370	0
TAGTGCAAATGAATATCGCACCGGGCGGGTGTTTTTTTTTCAAGGCCGCTACAAATATATGGACAGAGCAGCAGGTATTCTGACATCTTGAGCAGAAGGCCATTTCAGGGCTGATTTGGCCTTTGACTGCTACGTGAGGTGTCTCTGCTTGATAAGGGCCAATTTGACCCTTAATTACTTAATAAAATGTTAATTTTCTCGATAACACGTTACTTTACTAGTAACGGCTGTACAAAAAAAGGCCAGTTACAATAACTGGGCAATCCGCCGCGCTAGCGTTAACAATAACTGTAAAAATGTTAAGCGCCTCGCTACTTTACTCTACAGCCCCGGTTATCGTAAGTAAAGTAGCGACCCACCGTTGGCACAAGTCATGACAACGACTTGCAAAGAGATCTG…	CP110440.1	Puccinia triticina	91.191	2611	0
GGTACACCATTGGGATTTGCCAGACCTGTCAAACCGTGTTGGTTACTATTTGTCCTTTCTTATTGCAGGCTATGAGACCAAAAATATACCATCCCTGGAAAAGAGAGTGGTGTAAAGCAAAAGTGTTCCTGAGAAACACTTTGCTGAGTGCCAAAGGGATGAATGATGTTACCTCTGCCTTTCCTGGGTCACTAGACACTAAAACAAGCCCCCCAATCTATGATTGGAAGGCTATGTAGCAATAGTGGAGGTGTATCAAAAGATAGCCTACGTTGAACAAGTGGCTTAGGGGGTATGGGTGATGTAGCTGGTGCTGAGTGAGTCGTGAGTTGATATGGCCCGTGTGTTGCCGCAAAGGGGGTTGTGGAACACCTTGACAGAGCGGTTAATGATGAGTGA…	CP110440.1	Puccinia triticina	97.544	1588	0
TGTGTTGGAATTGCATTGTGATTCATTCACCAGAATCAAAATTGGACAGTCCTCCAATTTCTGCATCGATGTGTTTTTCATTTGTTCTAACATATTTTTGCTCACATTGGATTTGCACTTTCTCCTATATTATTCAGGATTTGTTCTGTAGTAAGAATGGGATGAATTCACTTTTAAAGAGATCAAGAATGGAATTCATTTAATACTTCTTTAAAGTTGCTAACACAAGATTCAAGAAGTGTACCAGGAATGGTTTCAAAAGTGCCAGACAATTCAGATAGAAATTTAGAAACAACAACTTGTAGCTTTTCTTCTAGAAACAAGGGGCCATTTCTCAACATTTCATTGTTAAGATTTTTCTAGGAAAAATTCTCTATTGGAAGGGTCAGAGAGATTATC…	CP110422.1	Puccinia triticina	95.048	20821	0
TATGTGTACCTGGTTCAGTTCTGGTCCTTGCTGACGCCGCCCTCCCACGGGTGGCGAAGGCGCGGGCGGCGGCGCCTCCTCGCCCACGGGCAGAAAATCGGGCCGTCGCTGATGGGGTCATGTACCTAGGGTTGGGTCATGGACCTGATCTAAGTACCTTACCCAAGGACACCCTTAGAGGTCGCCTTCCAGTCGACCAACGAGGGACTCACTCGACTGACTTGAAGGACTCGACCACAAAGACTCACTCGACCACCAGAGGAGTCAAGAGGCACTCTGCACTGCAACGGCCTGTGATCGTGAGCTTTTATGGTAGTAAAGACACTTTATGTGGGGCGTTATCAGTAACGCCCCGGACTTAACTCATCTTGAACCCTCTCCTACGTGGGCTAGCTAGGG…	CP110440.1	Puccinia triticina	94.094	1236	0
TCCAGCCCTTCTTTTTTGTCAACTCGTATTCTCTCCTGCTGCTTATTTTCAACTGTCATCTTTTTTTTTGTGTCAGGTCAAAGTCAAGGAGGAATCACGGGTTCACATGCAGGTTTGTCTCAACATTTGCTTTCGAATTGTGATTCATATTGATAAAGATTCTATTTTCCCTCTATTTCAAGAATCTGAAAACGATGATTTCAAAACATATCAACTCGTTAGTTATTCTTTGGTTCGTCGGCGCCATCAATATGTTATGCTTTTGGCCGATGGTGTTCTGTCCTACACTATACCGGCATCGAACCATTTTCACTACCACATACGAGAAAACTATGGATTTCGGTTGTCCTCAATGCAATGTGTACCTTCGTCTCAGATTATATGTCAGTATCATCCCCC…	CP110440.1	Puccinia triticina	95.882	2234	0
ATGCGGAATCTTAATCTGAACTCACGGTCCCCCAAAAAATTAAGACTTCCTGCCAAGATTCAGAATCTTGCAACATGAGATTTTTGTGAGATTCCCAAAATGCGTTTGGCTGCCCAATCTGGCAAAAATCTCCAATCAGAGATCTCACCAGCCACCAAAGGGCATTACACTGAGATACAGCTATTTTGCTGTATCTCAACACCAATTATAATCTCATAGCTCCCTTGGAGCTTTGAACATTGTACCAAAACCCTCTTCATGGGTCTGTACCAGTCATCAACAACCCTCTCAATGACCAGTCTGACTGGTAATCAAGAGGAATCAAAACTCTTGATGACCAATCTGACTGGTCATTGAGAGGGATCAAACCTCTTGATGAAACCTCTCAATCACCCAAGT…	CP110440.1	Puccinia triticina	93.814	1261	0
CAGAGAAGCCACAAGATTATTCACCACCTCCAACTTCAGACAAAATGAAGGCAATTTACTGGGTGGAGAGAAGGGCCGATTCAATAAGAAAACAACAATTTAGCTCAATTACGCAAAGTGCTCCCACCAGAAGCCACCTGCAGAGATTGAATTTTTGGTTTCTCTGTGGAAAAGGAAATATGGAAGAATATCAAGATGCCGTCTTTCACCCCTGCTTTCCAGAAGGGTACCCATCGGGGTCAAATTCTCATGTGCAAACAAAGGACAATGTGGAGAGGGCGCTGTCTCTGGCCAAAATCAAGAGTGAGTTTGACTGGGAAGTGCAAGGATCACTACAAAATGGCCATGGAACTCTGCCATTGTGGAAGTCCTAGGAAGCCGGTCTGTTGAATGGCTCTG…	CP110422.1	Puccinia triticina	91.735	5118	0
TCGTCACCGCTGCCAGCTCATGGTTCGCCTGAGGGCATGTAGTGTCATGAAAATGATGCCTGATGGCGCAGGGGCTTATATGGCTATTGCTGAAGAAAAGTTGAGCTGCTTATGATTGTGATCGGTATGAATTGCTCTTATAAGCCCAGGTCAATTTACAAGTAACCTCATCCTCTGCCAATCCAGTAACTTGAGGGTTTCCTACATTTCCGACTCCTAAAATTGCGTCAATTACCATAGAACTTCATCGCCGATTGGGTTGCCTTCTGCACGCACCGGCAGTTGTGCCTGCGCTCACCAAAGAACTCTTGGAAGTGAGTTTTCAGAACTTGCCGCATTTCCGCCGGCTTACTGCCAGAATCTGACATGTACCTTTTCCAGGTCTGTGAGGCTTTGAAC…	CP110440.1	Puccinia triticina	92.414	1371	0
TCAACGATTGCTGCTCTTGTATGTGAGTTCGACGCGGGTGGCGCCGGCCTACAACTCGACCCGATCGAAGCCCCTGCCGGACGATCTCGAGCACTCGATCATCCGGGAGAAGCCGCGAGCGCTCCGCCACCTTCTAGTCCTGTCGCGGATGGAGGCAACCACCGGGCACTGCCGCCGGCGTCATGGTCGCCTCGCCCTCCCGTCCAGGCTCTCTATCGGAAACCGAGAATGAGGACTACTTTTTCCATTCGGACCGGGACGCCAACCTGTGCTTGCGAGTGGTGATACGGAAACTGGCAGAGGCCAAGTGGCCTCGACCTCCAACCCGGGCGCTCAATCAATTCCCAAGAAGCTCCAGCATCTCTGAAACGCGCATTGGCAAGGTGATCGTCCAATAAT…	CP110440.1	Puccinia triticina	91.684	1924	0
GAACGCATTCGGCCAATTTGATATGCATAACGCATTTATTTCCTGGAAGCCAAAAAGGGAGACCCTACCGACGTGAATCAAGTTGACGGTTTAGAAGGTACCCACTCGATGTCTGTCGATTCGCCGAGCCAAAAATCCTTCAAGATCGCGGGGTAGTTTGATGCCCGTGACCTTGTTATTCTGGTCCAGGATCACGCCGTTCTTGACCAGACTTACTATTAGCCAGGGCATTGCTGCAGCTGTGGCGTCTTAGTGTGGACGTAAGCCGGCTTGTCGCTGCCTCTCCGGCTTGCAACTGGCTTGCTCTCCGGCTCGCCTTCTCCTGGAGCCTCCATTTCCCGTACAGGGATCGGGACACGGTCGCGGGCACTTTGTCATCCCCAGCCGCCGGGATTGGGT…	CP110422.1	Puccinia triticina	95.314	8963	0
TCCAACCATGCCAACCTGTGCAAGGCATCATGGTCAGCCTGTCTTATGGGTCCAGCCATCTCACCTGCCGGTCGGTCAGCATGGTTGGCTTGCCCTTGGGGTCCACAACTGGTTGGCTGTCCTTGGAAGTGAGCTGACCTTCCCAAAATTACATCATCCAACCGCTCAATCTTTCCGTTGGCTGCCTGAAGGTCAGAAACTCAGTTAAAAAATTGATTTTTAGAGAGACCACCAGTGGTCTGCCAAGCTTGCGAGCAGCTTGTACATAGAAAAGAAGAAATGAGCCTGTTTCTGTCTGAGCATAAGGGGACAATCTGTGGTAAATACTGTGGGGGTATGTTAACAGAATGTTGAGTGGTGTGTGGCTGTTACTGGCCTGCTTGTAAGCTTCTTCGGCAA…	CP110440.1	Puccinia triticina	94.944	1879	0
GGACTATGTGGGAGCTAACACGGTCCTAGATCTGGACTGGTATAAGGCCCGGAGGTGCCCTCCCAAGTCTAGGACCTCCTTTAGGGCCTCCGGGACTAAACGGGGTTTGGGACTAAATTTGGGATAGTCCCCTGACTTAGGGCCCTCGCTGGAGATGCTCTGAGGACCCAATCATTGGGTCTCAGCATGAATCAGCTAGTTTTAGACCCAATTCATGGGTCTGGGACCCAATCATTGGGTGCTGAATGCGGATAATCTGCACCACTTGGTCCTAGGATCTTTTGAAAACTCTGTGTCAACATGAAGCACCACATGTACACTTCCTTGTCAGGATGCAAATTGATAATTTTTATACGGTAAGAGCACATTTACAATTTGTTAGCATAATATGCTAGGACT…	CP110422.1	Puccinia triticina	94.962	2223	0
ACTTGTTGATTCAGAAATGGGAGAGGATCGAAAGGGAAACGGCTGGCAATGGTCAACGACTGGACCAATTGGAACCTTGCTTATGGGTTTCAGGCCAAGTTGTACGCAGATGCGCAAAGCATGAAGATACCTCAATCCGCAGTTCCAAATGTGACCGCGACATGGAACGCAATCAGGAATCGAGCGGGAAAGGGTATGCAGGAGGCAAGCCGCTCCCTCTCATTGACTGAATTTTAGGCCTTCAACCCGCCTCCTCTAGGACCTGTTAGCTTCCAGGACGAATTCCCAGTCCACGAATGAATCAGACATCGACTTGGAGGGCCATGAGACAAACGGAACACTAGGGTGAGGTTTGGATTGTTGCTATAACCAGCAAAGTCCTGCCGTGCTGACCACATG…	CP110453.1	Puccinia triticina	97.459	1810	0
CCGCTGGATTGAACAACAACATCTTGGCAAATTTCCTCAAAAAGGAAAACAACAAATGCAGAAATCCCAAGAAACAACCAAGAAGTGGAAATAGATCAGAACACCTCTAAAGTAGCCTTCATCCAATGAACATCAAAGATTCACAAACCTATCAAACACGTATCAATAAAAGCGTTGACGATTACCAGAAAAAATTCAAAGCGCAAGACCAACGAAGAAGAATCTTTTAAAAGAGACTTTAATGAACTCAACAATGTTATCACACTCCTTAAGAACAAATACGCTGCAAAAAGAAGAAAAAAAACCCAAAATTTGTTTACCCCGCACTTGATATCAATGAACTTCATGAGTTCAAGTTGAGCAATTCAAAAATTGATGAATGGAGTGCCAAAGCCTTTG…	CP110440.1	Puccinia triticina	92.461	1552	0
GTCCCTGTTCTTGGATCATTACGTATTGTCGACCTCCATTAATGAAGCACAAGTCCATCTTGGACAACCCCAAATTTTCACCCTTCTTCAATCGATGTATAGGCACAATGGATGGCTGTCATGTCCCAGCATGTGTCCCCAAAACGATGGCAGGCTGCCTATCGGAATTGGAAAGGGACACTCTCTCAGAATGTACTTGGTGTAGTGGACTTCAACATGAAGTTCACCTACATTATGGTTGACTGGGGGGGGGTTGTCGCATGACTCGAGGGTCCTTGGAAGTGCAATGGCTGAAGATTTGGCGTTTGCAGAGGCTCGTTCTACCTTCCCCGATGCGGGTTACTCGCTCTCCAAAGGTATACTGGTTCCTTACCGGGGGATTGATATAGCCTAGATGGC…	CP110422.1	Puccinia triticina	93.091	3271	0
ACGCTTCTTCCCCTCTCAAAACATCAACCCCGACGCCTTCTCTCTGCTGAATTTGAATTGCCACGTCTCACAATCAGTCACGCTAAGTCTTTTGAACTTGTCTTTTTCTTTTGATGTTTTACTGCTTCAGGAACCTTGGAATTAATTCATTTGATCTCTGCCGCCTCAACATGCAGCTTTGAGTTAGTATGTCGCTTATGAACATGTGCCCAGGTGCTGGAACAAAAGACATAAGACTGTTATCTATATACAGCGGTGGATGCCCTCGGAGTCAATAAGGCTACTGGGGGGATTGCAGGACTTGTCGGGGTGGATGGAAAACATGCTCCGGGAAGGTCTTTCGGCTCCTGAACATATATAACCCTCCGTCATCCTTTTCCGCGATCCCCGAGTTGAAGA…	CP110422.1	Puccinia triticina	93.246	4131	0
GTAACCCTACTTGGTTCAGTTGGTCCTTGTAGATGCACATTGACGACCTTACGTTTTCATCTCAAATACTATTGACAAGGGCTTTGAAGATTCCATCCTTTGTTACAAAGCCAAACCATCACTACGCTCTTCATCTTCCTGATTGTCTCTCTCAGTTTCATACAGCACCACAGTGGACAGCATGGTGACTTGAGAGGTTGAATGGATCACTAGCTTCAATACCCACAAACAACCACATTGGCAAGTTATTTATTCAAATAAAGTCTCAAATCATTATTTTTCTGTTAGAAAGCTAATGTTTTCATTCCTTTTAGAATCACGGGATCTGACCATGTTGACCAGATTGGTGACAGCCCAAAATTATTGCAATCTTCTGCCGCATCTTTGTCCAATCTTCCA…	CP110440.1	Puccinia triticina	93.449	2015	0
AGGCTCACGTATGTGGCAAAGGTAATGCTTTGACAAAAGTAGATAGACCCTGGAGGTGCACTATGGAGGGGACTTTGCTTTTCTATCCTATGCCCGCTTATAACACCAGAAAAAAAAAAACAAGAAACTCCACTAGGGTTGCGATTGCTTTCAGCGGCTCTTGCTCCTGAAACGGCTTGAGGGTACAAGAATGAGCTGTTTAGTTGATCTTTGATTGCTCCTGCGACGAGGAAGAAGGAAGAGATAGGGCCTGGCGATATGGACGTCCAGTGGACTAAAGAAAGAAAGAAGGGGTCGACAATTCCTCTAATCGATCGGTGGAGTTTCCAGGAGAGAGCCAGGAATGGGGTGATGAGAGTGTCTGTAGCCGTAGTAGGACTTGGGTTAGATTGAGAGAAG…	CP110422.1	Puccinia triticina	94.632	10320	0
TTAACCCTACTTCATTCAGTTGGTCCTTGCTCTTCACATTTACATCTCTTGGAGTCAATGCCTCAACCAGAGATGCATCAATCAAGGTGAAGGTATCCATACATTCAAGGTGAAGGTATCCATACATTCAAGGTGAAGGGTACAATTCACCATAACATCGGAAGTTGGCTTCCACTTTCACAGGAATTCCCCAAATTCTTACAGCTGGACATATATGACACAGAAAATGAGGGTACAATTCACCATAACATTGGAAGTTTGCTTCCACTTTCACAGGAATTCCCCAAATTCTTACAGCTGGACATATATGACACAGAAAATGAGTTTGAAAACCACAGAGTTCATGGTCAAGATCTACTTCCAGGACTTATGCAAAGAATCTAAACAATCCTTCACCAT…	CP110440.1	Puccinia triticina	95.526	1520	0
GAAGTAGAGGGGGGTGCGAAGGTAGTGAGGGGTAGGGGGCAAAGGGAGATAGGAGGGGGGGAGGAACAGGTATAAATGTAGGTTAAGATTTATTGATTTCTTTAAAAATTAGGGTATAATAAGCGTAAGTGAAAAAAGAAGGGATATGATAGGGGGAAATAGTGTTAAACAGATAATAAAATTAATCTTAGAGTATTGGGGGGGGGGGGGATAAGGTATAAGGTATGGAGGGGGTGTGTGAAAGGTGATGATTGGTTAGGGTTGTGATAGGTATAGATATAGCACTTTGCAAATATTATTATAAGGGCTTGCACAGGTGTGTTGTGTTGTGTATATTTTAGTTCAGGTAAATGTAGGAGAGATATATTTAAGCATAGTAACGTGGAGAGGTAGGTGAAC…	NC_044103.1	Puccinia triticina	95.398	1282	0
TAGGTATCAGATGGATATTGGCACACATGCTGAATTGGTGCCTGAATGGGGAAGGTGCCATTGGGGGGAAATGAGAGTTATGAATGTTTCTTGGCTTGATGAAAGATATGATAGGTTGAAATACAATAAACCATGACTCACAGGAAGGAGACTCATGAAGTTCAGAATCTCAACAAAATTGACTGGATCCCTTAAATTGAGGAGAATTTTCTGGGACTGGAGAAAGTGTGGACAAGTATGGGGAGTAGCAGTTGGATGGCAAGTCCCAAGGGACATCCTTGAAGCTGGTGGGAGGTGCTGAGGTTGAAGGTTTGACACAATATTCTAAAACAAACTTGTGGACAAATTGGGACCCCTTGGTGATAGTCTGTATCTGGATAAATATGCTGTCCAAATTTT…	CP110422.1	Puccinia triticina	91.508	1684	0
ATATATAGAAATAAAGAGGAATGAATGAAAGATGTTTATTATGTTCTTCTCTTCTGAAAGTCTAGGGAGGCAATAGAGCTTGAGGAGTACAACTTATGTATCAGGCTTCTAGGTTGACTAGATACAAGCATACATAAACTATGTCAATAGTAAAATCAAAGAGTGTGAAATGTGAAGAAACATGTGAAATAAGTGTGAAACTAGTAATAATTGCAGATGGTGTAGCAAAACAGGAAGTTGGCAAGTTAAGGGGAAACTTGGTTTTGCTTGCCAGCTGACATTAGATCACTAAAAAAAACAGTAAGAAAATGATGAAGCTATGATTCTAATAGTCAAATAATAAAGTGACCAGGAATCTTGAACCAGTACCAGCAAAGAGATTGAGAACCTTTGTGAAAT…	CP110440.1	Puccinia triticina	92.359	7721	0
ATGTGCCTGTTACTTAGACATTACGTATTGCTAAATTCCCAACAGTGATGATTTACAAAAGGATCAGAAGAAACCGAACGAGAAAAATACTCCGGTCAGATCAACTACAAATCACTCTTCGAATTCTTTAAATCCCACGCGCCACCTAAAGAAGAGAAACCGAAGAAAGAAAGCCCCGGAAAAGCCGCTGGTGAATTGTAAAACCCACCCCCTTCCATCTTGAATGATCTCTGTTGTGTTATCATCATCCCAGCGAGCAAAATATCTTTACTGGAGGACATGCATTTAAATTCGTGATAAATATCAGCAAACATTTTAGGCCCTGTTTGGAGCCGATATGATCCGGCAATATATGAGTTTTTGCCTGACATCCTATGTGACATCTGATCAGGTCTGCCA…	CP110440.1	Puccinia triticina	95.813	2269	0
AATAATTAGAGACCCAGAAGGCTACTGATGGACTCCGCCGGAATCTGAAGCTCCCTCAAAGTGCAAAAAATCTAGTTAAATTGCTTGGGGATACCTTGACCACCACAAAACCCAGTGTGTCATTTCTTCTTCCTGTCACTCATGCCTACACCACCATGACTGACAAGTGCTCCCTTGCCAGAATTTGAGGAAACAGGTGAAATTGCAAGTGATGAGCCATCAGATCACCACAATAAAATATAGCGAGACACCCCACCATCAACATCTAGAGCGGCACCCGGGAAGGCCAGGAAGAGAAAAGAGAAACCCAACCAAGGAAAAGGCGCCAAGCCTGTTTGATCTCTTGAGCAAGAAACCCAGTGTTCAACTTTCCACCAGACCACCCAAACAATCATTTGT…	CP110440.1	Puccinia triticina	94.344	2723	0
TTGAGTGGACACAACCTCCAATCAATGGTTATCCAAGAACAGTGATCAAGTGGAGGGATATTCCACTCAATGACTTTACAACCCATTAATTGAGTGGAGGGGGTCTCAAATTGATTCCTGAAACACACCACTAAGTGTAGAATCCCAGGGTGTACCAGGCATCAGTGGGGGTACCTCAACTCAATTACAGAAATGTTCACCATGGAGTGGATCAAAGATCAGCCTGAGTTGAACATAAGGTGAGCATCTTGAAGCCTAAATCCCACATGCTCACAAATTTGACATCAGACAGTCTTCCCAAAGGGACATCCGGTCTGGCACTCTCCAGGGAGTGCCACACTTTCCCCCCTGGTGAACAGCTCAATCTTGACCGGTGCCTGCGCGATATACCTACGCCAA…	CP110440.1	Puccinia triticina	97.109	761	0
GTGCACATGAAAGGGGAATTTTCACATGAAAGGGGAATTAGCCAGGTATCAACTCAGTATTTTGGATCTCTGGCATAAATTATGCAATTTGCATGGAAATTGAATCAACCATACTTGATTCTTGCATGAGGCACAGCTTGTGGCTCCTACATGGACTCCAGGCATTTTCTAGACTCTTGCAGTGATTGTTGATTGCGCACACATCCAAGGCAGGAAAAAATTTTCCTGGAAAACACATTTCAACAAAAAAACAATACACAAAAGGGAAGCTGCAAGCGTGGAAAGAAAGAGAAATGCAAGAGCTATGTACAGGAGGAGCAGAATCTAAAATCCAATTGTTAGGAGTCTGTACAAATGCATGTCCAGAGCAGAGGCTTAGTGGGTTGAGGCCTCAGGAGG…	CP110440.1	Puccinia triticina	91.3	2115	0
CAATGCATTGCCTTCCCATGCTGATGATGATGTCTTGAGGGAAGAAGTTCTTGAGGATCCTTACGGTGATGCTCCTGACTAGCTGGCCACAAGAGGGGCCACCACACCGGTGTGTGGGGACAAGAGAGGATGGAAAAGCCATGATACTTTTGGTCAATTCCCAATCTTTAGAATGTAATGCGCCGTTACAACCATGTAGCCGGTAAGATCTGATGACGTCAACAAATCGGTCGTTAAAGCAATTTGGCTGGCCTTTGCCATCTTGTTCATCTTGATTTCCTTGTACCAATTGTAGATACTGATGCAATCGTTCCTCAAGGTCATTCATCTGGGGAATTGCAAAAATCGGCGATGCCTTCATGAAATCGATGAAGCCCTCGTGCTGCACCCAACAGATAT…	CP110422.1	Puccinia triticina	95.078	32301	0
ACCATTGCTTCAACCACACGAAGTTCTCAGAAAGCCTGGCCAACCAGTACATCCACCAACTTGCTCACTCCATCGGCTACCACATCGTTGGATCCGCCCAGCTCAACCACAGCTTCCAGTACCCCTACAATTGCTTGCTGAGCCTCAAGTTCATCACTGAGCAAAGAGGATTTACGAGGTATTTTGTGATTACATGGACATGGAGATGGTGCTCATCTGTTTGAGTTCATGGGCAAAGTCGTGCCCTCCCCTGCAAAACATTACCGTATATTAGGGGCGCTTGCAAGGCTGACATTGGGTTTGCTCTTTTTGCTTGTGTGGGAAGAAAGTAACTACAGCTGAGAAACATGGTTGTCCGGATCTGGGAGACAAAATGAGATCAGGCGGGCATAGTTTGTT…	CP110440.1	Puccinia triticina	94.974	1134	0
ATGTTATGTGTATACTGGTTCAGTTGGTGTTTGCTTAGATTGCATAAGATATCAGAGACATGACAGGAAACAAATGGAAGAGAAAGTGAGATGGGACTATACCTGAGGGGTGAGTGAGTGGTGAGCAGAATGGATGAGTAATCCATCCTGTCACCGTAGGCTCTAGGGTATAGCCCTCTATATGTGACACCTGTGCAACAGGCATGTCGCATACGCGGAAAGGACTTACAGGTCTAGCTCAACAGCATAGTGTTAGCTTTTAAGCTACGCTATGGTGGCGCTAGTGTTAGCGGCCAGGATTTTCCCGCTAACACTAACAAGGTAGAAGGAAGCACTTGTGTAGCGCTAGCGTAGCGTTAGCGGTTATTTAGCCGCTAACGCTTCCATTTCGTCTGGATA…	CP110441.1	Puccinia triticina	95.271	1311	0
AATATTGCTCATTAGTGGGAATTGAAAAAGAAGTTTAACACTATTCAAATTCTTTGGAATTAGCATTATAGTGATTTTAGCATTCCAGAAAGGTACACTAGCAGTTGGTCTGGTGCTCTGTGAAGTTAAACGCCTAACTTCTAGTGTGGTGGTTGTACTTTGATTACATATGTAAACACATGTTGTGTATTTTTGCCCAAGACCAGGTTCTAATTGAACTCATATGGACTACAGTAGACCTCAGACAGCATCAATGTTCACTCCTGATATACTATACTACAGTACACAACCATCATTCAGCACACCAAACATCATTGATACTACTCATTCATCACGTTATAACTTCTCCCTCAAATAAAATCCACTCATCTCTTGCTTGATTGCTTCAACTCATCACTT…	CP110423.1	Puccinia triticina	95.996	1124	0
GTTATGTCCTGTTCTTTGGTTCAACCTTGGTATTCTTAAAGAATCACGATGCCGAAGGTTTCATTGAGTTTGGACTCCGTTTGATATACCTTTTCTTTGAAATACTGAAACATGCAATAAAACAACAATATGGCTTTTGACACCGGTTAGTAGGTTAGTCCCAAAAATGATATAAATGTGTAAAATAAAGCCCATAAACATCCAGAAGGGGTAATATAATAGCATGGAACAATAGAAAATTATAGATACGTTGGAAGGGCCCAATAAAGCATGCCAAGCTTAAAATATTCTCGTCCTCGAGTAGGTAAATGATAAAAACAGAATTTTTGATGTGGAATGCTACCTAGCATAATTCTCAATGTAATTTTCTTTATTGTGGCATGAATGTTAGATCCAAAT…	CP110434.1	Puccinia triticina	95.907	1979	0
TTCAAGAGGCTGACAGCATCTTCCTTCGAATTCGGATTGAAGATACTGAGGATAGCAGTCGCCGTGTGGTTGATGGCATCATCCCATCCAGTGAGACTGACAGAGTACTGGGATGGCAAGTGGATCGGGGGGAGAATGAGAGGCAGGATGATGTGTGCTGGAAGAGGTGGATGAGGAGGAGAGTGTTTGGGGTGAAGATGGTTATGAGGGCCATCCCATCAACCAGTTTGAATTACCAGCAATGCCTTCTTTCCGCGGCCTGCTAAAAATATCTACTTTCGTTCCGTTGGCCGTGGTGAATGATGGTGGGTTGCGGCCCGGATGAGCTGGAAGGGCAATCCGAGTATGTCACAGGCCACACCTGTCACTTGCAATCCATCACATGCTCCGGTCTTCATG…	CP110423.1	Puccinia triticina	94.069	1585	0
ATGTTTTGTAACCCTACTTCGTTCAGTTACGTATACAATTTGATAGGAAGCATTTTGTCTGCCTTTTTTAAGATACCCCAAACGATTTTATTCTAGATTAAGTCATGCGAACCAGGAAGGGGGAGGGAGAGAGAGACCATTCAACTGTATACAAATTTTTTCTGGAGGAATTGAAAAGAAAAGAAAATTGGATATATATTTGGTTTGTGTTTAGGTCAAACCATAGAATTGACATTTGGACCGACGGAAGCGTAGAGTTCAGCTGAAGCCAAGCTCTTGGGGGACACAACCAATGAATTCTAATAACCCAGTCCGAGTTTTATCCTCGTTTTTCCTCAATGATCAGATTAGATTGCCATATCTTTCTCAAGAAGTGCGACACATTGCGTATCTAGACAA…	CP110441.1	Puccinia triticina	93.211	2180	0
TCATCATCCACCAGATGTAGATTGGGTTTAGCATTGGAAGACTCTACTCAGCATTGGAATACTCTACATTGGATGATTTCTGATCAGATTCCTCTAGTGAATTGGTGTGGATGCTGCTTTTTTAGTTCTTGGACTGCTGTTTTGGAGCCTTCAGGGACCTCTTCTCATTTTGGAATTTTATTAATTCAGCTTTGACTAAACACTCCAAATGCCAATGGGTCTTGTTTGTTTGATCTCACCCCACATTTCTTGAGTGGATGACTTGCCCTTAGTATTCTTTTTGATGATTGGAGCTTGAATTGCAACAGTTGTATTAACTCTGGCTATAGAAAAAGTGAAAAGAAGGTCCAAGTGATAGGGTGTTCCAACCCACAACCTTGTGTATTGTGAGAGTTGAAC…	CP110441.1	Puccinia triticina	94.509	2750	0
ACCCATAACTCCAGGGGCCCTAGAGCAGCTAGAGACCTAACGCACCTTTATCCTCTGTGAACATGTCTGAGGACTTGCCCATCACTCTAGGGTTCCTTTGGAGGGGCCCACAGCGTACACTTCTTCCGGACATGAAGATGTATTACATGAAAGTGGAAAAGCATCAACCAACGCTCTTCCATAACTCCTTCCTCTTCAGTCATCTTCTGGGTTTTGCGTGACTAACTGTTCCAGGTCCCTCGGGACTTCTATTTGCAATTGATATCTCCCCTGGTGTCCAAGCCTAATTCCTCTTCAGAGCGTGTCTGCCCGGTGTGGTGGTCTAAATGGTAGTCAGCTTCAGATCCAAACCAAGGTGCGTCCTAAGACCTAAGACTTCCAATCTCTCAAGATTCACTG…	CP110423.1	Puccinia triticina	96.064	940	0
GCAGAGAAAATCAGCCCCTCCTAGACAGGGGTCTGAGAATACAAGCCAGGGAGTAAATGACATGACTGTGAGTCAAGAAATACCATAATGGAGAATGCTATCTAAGAGACTAAGATCTTATCTGAATGAAACACAAAAAGAATCATGGAGAAGAGTGAGTGAGAAACAATTATGGGGAACAAGGAATGAGTATGAAAATCCAAGTTTCAAAGATCTCACCACTAGAAGAAAAATTCAAGCAACTGCCACCATTTAACATGCAGGAACTCTGAGGCAGCTGGTGGTATTCTTTGAAATTTATCTAAGGTTAACTGGAACAAGCTTCAATGCACAGTTGATGTGCATGTTGCACAGTGACTGTGCAAATAAACATTGTGGTACAATGGGGTAGAGTTACAA…	CP110441.1	Puccinia triticina	97.332	4348	0
ATGTTTTTGTCCTCTACTGGTTCAGTTGGTCTTGTAAAGGCTTTATCTGTAGTGTCTTGAGTCAGCCAGGATGCTGTTGTGTCTTCAGTCGGCCCAGGTTCCGGTCCAGTATGTGTTCTTCTCAAAGTCTTCTACCGTATCCCTTTTCTATTGCTCTAGAATCACTCAATCATCTAGCCATTTCAACCTCTTCCTTTCTCTCTCTATCTTGGCCTTTCTTGGAGGTTTTTGACTTTGAGGTGTCCACTTCTGTTAAATTTCCTTTTTTGAGTGTGATTTCCAGTTATCCTCTCTTAATCCTGGTAAGCATTTCTGGCGCAATATATATTGATTACAGTTTGTTTCCAAATGCTTCATCTGCCCATCAATCATCTCTCCACCAATAACTTGAGTGATTTC…	CP110441.1	Puccinia triticina	94.273	2689	0
GCCAGTGGCTCAGAGTCAAAATGGTTCAAAAGTGGTCATTAGATTACCCACTCAGCCAGCCAGAAACAGTGGAAGACTTCCTGTGCAATCTGAAACCTGTGCAGATTTTGGTTCAGACCCAAAAGAGTCTAGATTTTCACAGGAAAACTGCAGCTTTTTTTTGGGCTCAGACTACTTCTGCCCTCACCCTGCAGATCTGGACAGGAGGTGGGAGGGCTTCCCTTTGAGATCTAATGAGCCTGAAGGCCCCATCTCCCCCAAAAATTAAGGCATTCTGGCTGCAGATTCTTGTTCTACAGGGCTGCAGATCAGTGTGAGTCATCCAGTCATCTCCAGCATTTAATATCAGCTCTTGCTGGAATTTCTCTTGATTTCCACAGCCATTTCAAGGCTTTTTAA…	CP110441.1	Puccinia triticina	90.969	2259	0
AATCCTTGTTCCCACCCAATCCTGCAATTCAATGCTTTGCACTAGTCTGTCATCTCCACCCAATTTCCGCACTTCACTTTCCCAGGCTCTGCTCCTCTCCGACGCTTGACCTCCCATGTCCTCTCCCCAGCCCCCTCTCACCAGTTCCACCCACTTCAGCTGCCCTGGCTCGCCACTGCTATCAGTCCCCAAATTTGGTCCACCGCAGTCCAGCTCTCACTGTTCTGCCTCATTCTGCCTCCCAATCCAAATCCAAATCCCACGGTCTGCAATCCGCATAACATTGAATTCGTACTTTCTGTGCCGTATGCGACTTTCTGTAAGCTTTTTCTGTTGTGGCTTTCCTCTTACACCACCCCAGTGCTTTATGTCACCAAATGCACTCTGAGCTCAGCTGTT…	CP110441.1	Puccinia triticina	93.557	3399	0
TGTTATGTAACCTACTGGTTCAGTTAGGGTCTTACTTACCAGGGATTCCCCCTCCTAATAAGTAAGTAAGTAAAGAAAAACCCCTCCTCCCTCTGCCATACAAAGAGACCCTCCGCGAGAAAACTCCCACCGCATCTCATTCCCACATAGAACTAAAACTACACAACAGCAATAAAAATAAAACAGATCCTCCTCCTATCCCACGCACGCTGTCACCGCCGCTCCCACATTGTTCTCTGCGCTTCTGTTGCTTGCCGTAGACAGCCACCAAACTCCGCCGCATCCATCATCCACAACCCTGCCTAGCCTCCGAAGGCTGGGGATCCTACTCGCCACCTCCGCCCCAGCTGCCGCGGCTTCCCCAGCTCTGTGCCGCTACTAGAAAGTCCGCGCTGGACT…	CP110441.1	Puccinia triticina	93.421	1368	0
GCACTAACCACTCGAGTAACTTGCAGAATTAGTCCCGAGAATGTCTCAATGAAGGTTGAATGTTGAAATCGCAATGTCAACTGGCCCCCACACAACTGGGTATCAAACCAACACCAAGAGGCCCTGAACGTGCATGACGGTAAGGCGAATGTGGCTGGACCAGTCATTTGATGATGAATGGGCCTTCAGGTCGTGACACTCAAGCGAATCCAGTTGGCCCAGTAGATCTGAAGAATCCTAGCTCATGAAGGACAACTAATAGCGGGCAATCAAGCAAGGGTATTGGGGCCTATCCAACTCGAATGACCGGACTCGCATTGACATGTTTGGTCCTGGTTCTCGTGAGCGCGGTAAAAAGTACGGTTGTTATTATTTGGCTCTCATCTAACTAACAATATC…	CP110448.1	Puccinia triticina	94.81	1503	0
GAGGTGTACCAAGTCCATTCATTCCCGCCTTTCCTCTTGATCTCTATACGTGTTTGCAGGTCCCTTGCCTTTGTCGGGGCGTGGTGGTGGTAAACCGGTTTGTGGATTCCAGTTTGAAGTGTTTGCAAAAAATCGGTTTTCTGAAGGAGTTTCTAGAGGAGCAAATCTGCCTTCCAATTCTGGCATGTTTGTAAATGAGCACTCATGTACAACTATGTTGATTTTCTGGTTGTTCTAAAAAATTCTATCTGTTAGATCTATCCTTCTAATCTCTGATTTTCTCGATTATAATAGTACTGGTTCCAGACGCTGAGGGGTTTATTCCAAATAACTAATGGTAACTAGGAAAGTCTTAGACAGTTCTACGATTATGCAGAGTCTATGTCTGTCCGGCTTCTT…	CP110449.1	Puccinia triticina	90.429	1630	0
GAAACCAGTGAGTGACTGATTTTTGTCTCCAAAATTGACAGCAAGCTAGTGCATTTGGGCTTATGTGTTGAATTGTGATCATCTCCTTCTGAAATTCCCCCAAAAAGAACCCATCTGGCTCTGGTGTGGTTAGTATCTGAATCTAATTGTGAGACAAAAGAGAGAATTCCAAATAATCCATGAGCATCTGTCCTATTTGGTTCTGTTAGATTGCTCAATTCACTCAGAATTGAAAATAGCTATTCCCCAATGAATACAAATTTCTATACTCTACATGCTCAATGATTTTCCTATTCCTTGGAATATCTGCTTAATTTTGAACTCTCCAGTTTGGCTTGATCTAATTGTGATGTATAAAAGAATGATTGAGTTGTTGAAATTTTACTACTCTGTTTCAAT…	CP110441.1	Puccinia triticina	94.586	2087	0
GTGTACTGGTTGGTACCGTATTGCTGTTTGTGAAGGAACATGGCGCAAGATGGAGTGTGCTCAATGAGCTCCATACTGGAGGCCAATAGAATTCTATCGAAATTAAATTGATGCAAGCCTTGATTTTGGGTGACTTGAAAGATCACACGATGCGCTTCATGTCATTGCCATCAGTCGCATCCAAGCTTAAGGATATTCAAGAGAAGATGAGGAAATGGCCAAGTGACCAGTCATATACCAATACTCCGTTTGCAACAAATTGTGTCACTAACTCCACCAACAAGGGCAAGTGGAAATTAGACAATCTGAAGAATCAAATCAAACCTCTGAAAAACCAAACAAGCGAGCCTGTGCAGCCAAAGACAAGCAAACACCAGCCACAACAACGCTAGGTCTTGG…	CP110423.1	Puccinia triticina	92.642	1590	0
TTCAGAAGAGATAGGATGATCCACCCGTGGTAAAATACATGAAAGCTATGAGGATAAAAAGGCCTGGTAGAAATTAGATCTTGAACCGCATCTTTTATGGTTTGTTTGCTTTAATTTGCAAACATGATCATCAATGATGTAAAATTATAGATAACAAGGCACGCCAAAAGTTTGGTGATGCTAAAATGATTAATTACATGTATGGTTTTAAACTTGATAGCCCATAATGAAACACTTCTATAAGTGTAACAGGGAATGCCTGGTGAGTTCCATACTGATCAGTCATTTGATTGGAAGATAGGGAAGAAATCATCTTAGAGATATTACTTGCTGGACCCCTGAGATTGCAGCGGCAAAGCCGCCTTGGCCTCTAATGAATACAAGGATGTTGAATTGAAA…	CP110423.1	Puccinia triticina	94.739	2091	0
TTAAGTAGGAATTCTCCAAGCTTCTTCCAAAATGAAAGCCGAGTTTCCTCTTCCTTGAAATTGAGCAGAAATAAGTTTGATTCTGTGTAAACCAAGTGTTTGAGGCTTGAAATCATCTCAATATCTTCTTTAAAAGTCTGAAGTTGGTGGAAGACTATTGATTTCTGAATTCATTTGATATAACCCCTGGGTAATATTGCTGGATGATCCTGAGGATTTCATATACCAATTTGAAATGAATGAGCACTTCATCTTGCTGATTATCTTCAAAATTTGCTGTAGCTATATAGGAAATAGTATTCTTCAAGAGATCCCTCATTTCAGATGATGAACTGGTTCTGTCCAGTGATGCCTTTCAAGAAATTCTTTTTGGATTCCATCAAAATCACCAAAAGAAGC…	CP110441.1	Puccinia triticina	95.93	1818	0
ACTGGCACACAAAGTGAAATTCAATTTATGGAGCGGGGCTAAGCAGAACAATATTGATCTCACAACCCCCCCCCTCCCAAAAGATAGTGGTGCAGGATAGTTATAGCTACGCCTCTGCCTCTGCCATTTTAAGGTCAAATACGCCCTCTGCCTCCCGCGGGTGCCGGTTTCTCATGCCATTACATCTTTCTGTTAGTTCTTTCCCAAATTTATTTTTTCTTCTTTACACCCCTCCTTTCCCTATTTGGCTGTATTTGCATCAAGATTTCCTTTCTCATTGTTAGTCCACTTGCAAGTATAACGGTTGTTGTTCTGGTTGTTTTCTGACGCTTGTTATTGTCATGCACGCAGTGTCGTACACAAGGGTCAGGCGCACACCACTCATCTTAAACTATAATT…	CP110425.1	Puccinia triticina	93.008	1187	0
CGGATGATGATTCACAGGCTTCTTGCGATCATGGTAGAATTTTGGGGTGGGGAGCGCCCTAGTTGGAGAACAAAGAACAAACTGTTCAATGGCTCAATCAGAAACCTCTTCAAAAGGGTCACTCACTCGATTTGCCGAACTCGCCCGAGGGCGTAACTATACGGATAGGAGGCTCTTCGGGAAGGAGAAATCATATTAACTACTGGAGGAGCTATTGAAGCAAATCGGTACTAAAGCTGATAGGATGAGGAAAGCTCTGAAGCCAAAGAAGATCAGCCTTTTTATATTCTTCAGGAGGTGATCAGCTCTTGCTTGAGCCTCACCAGCGTGACTTGGAAAACAAGGAAATGCCTTGTCCATTGGCCAGCTTCTTCAACTGCGACTCGCCAAGGTATCGCC…	CP110446.1	Puccinia triticina	92.89	1519	0
TAACAACCATGTCCCGCAATCCTGATAGCTGGCGGTGGCGTTCAGCCTTGTGATGCGCAAATGCATTCAACAGATAACTATTGTGATTAGTGTGTGGATGTGATAACAGACAGATGTGCCCTCTTGTCGCTTGTTCACTGGCACAGCTGCCTCCACTGGCACCTATACCTCAATGCAATTATGCTGTACGTTGAGGCAACACTTAATCCACTGATCAAATGATTTTGCTGTCAATTTTCCTGGTGACATAATGTTTGAGGTTTATGTATAATTTACTTACTGGGACAGGGTTGGATGGCGTAGGCTTGGACCTCTTCTGCAGTGTAGGCATTTGGGTATGACGATTGATGTGTCCTCTCTGACATTCCACACGTCTCACATCATGGTGATTCCCTGGGG…	CP110425.1	Puccinia triticina	94.573	1474	0
CTTTAAAATAAATTGGCGTGGATTTTCTCTTTATAACACTTTGGCTTCGCTGTCTCAGGCTTGGTTGAAACTCGCAGAATCCTGCCGTGAAACTTTGGAATGGCCGACGAAGTACCCCTCAATCTTTGCCAACTGTCCTCTCCGATTACGCTCTGGGTCAGTATCAAATTCCTTAAGCGTGACCTGCTGATTTTCTTGACACGTGCAGCGTTGTTAGCTCTGCTACATGCCATCCTCGCTTTTTTTTCTTCGCTCTTGTTAGATTGCTGTTATATGGATATCCAGGATGCGGTAAAACTTTATTGGCTTCTGCAATTGCGAAAGAGTGTGGCTTGAATTTCATCAACATCAAGGGGCCCGAATTACTGAATAATTATATTGGGGCAAGTGAGCAAAGCG…	CP110446.1	Puccinia triticina	93.798	1548	0
TCCCCCTAAGCAAAGCCCTACACAAGACACTTAACCTTGAAGCCAAATTTTGATCATCCAACATTGCAAAGCACTTCAACTTGCAAGCCCTCATGGATTCAACAGAAAGCTTACCTCCGGCATAGAAATGTGAAAATTTGACCAAAGAACCATCTGTCAAAGAAATTTCTGCCAAAGAAGAACTGTCCGGAAACAAAGAACCATCTGAAAATATGAATTTACCGGATCCTCAGCAGCTAGCAAACTCATTACTGCACCTCCGGAGCACAACTTTGGATCAAGGAATGGATTCTTCAAGACTATCTAGAAAGTGGTCTTTTGACCATGGATTTGCCATTGCAAAAGGAATTTCCAACTCTGTCAAAGGACAAAATTGTGTGGTTTATCAATGTGACAATT…	CP110425.1	Puccinia triticina	93.445	1190	0
TGGATCTTGCCATAGAGTATCTCAATAGGGGTTTTGGGATGAATTCGAGAGTGGGGGAGCCTGTTGTGCATACACTGCCACCTGTTGAGCGTAGCTCCAGAACTTCATAGGAAGGGGGCTTTGTTGGAGCATAACCCGGGACATATTGTTAATGAGCGGTTTACCCTCTCAGCCTCTCCGCCATTTTCCTTGGGATGGTACAGGGATGAGTGGGTGAGTACGACGCCACAGTCTTCCAAGATCTTCGCCAGTTTCTTTGACAGGAATTCGCCCCCATTATTGCAGCGCAGAAATTGTGGGTATCAACCAGCTGCTTTCATAGCGCGAGCCACACCTTCAGTCGATCTGTCACATCAGATTTATTCTTGAGCGGCGCGAGTAATGTGTACATTGAGGCAT…	CP110425.1	Puccinia triticina	93.916	1808	0
GTGTGTCGGAGGGTGAGAGTGGTGGGTTTGAGGTGGTTTGAGGCATCCCGTACTGGCGAGCGACTTCCTCAAAGAGCCATGTTGTGAAGGCTGGATCATACATATCTTCGCCGATCAGCTCGGAGAGTTCTAGATTCATAGGATCGTTAGAAAGAGAGCAGCATATAGGAGATGAGTTCTGAAGGAAGCTGTCGATCCATCGCATGGTCAGGGATGGGAGGATGAGGAGACAGACCAGCAGTGATTTGCTCGGCTTTTAGCATTGGCCAGCATCATCAAGACAACCTCCGGCGATCACGACATCGTCGGCGGTCGAGTAGGAGTATTCGGCCAGCTTCCGCTGGACTTCGGCCTGTGGAGGAGCCAGGGCCAGTCAGCAGTGTGGGCTCAGGAGGGAGA…	CP110425.1	Puccinia triticina	94.472	3057	0
AAGAAAATTTCTCTACAGGTGTCAAGTCCCTAGTATAGAGTTCAGTTTTGGGCAAGCAGATTTCAGCAAGGCACATAATTAATATACAATATTTATGCAATTGTGGGCTTATAATCAGGAACATAAGCAGACATTTAATAAAATCATTCTGGGAACTTGTGGAATGATATCTGAAAATCAAAATGCAAAAAAAGAAAAGCCTGTATTACTTCAAATTATTATGCAACTATAATTTTCAGTGATCCTATCAATTGAAAAGTAAAAAAGATGGTCGAAGAAATCCTTAAAATCAGGTCTGAATGATGCTTCATAATTTGTTTTGGCATAGCTCCATAACTCATGATTGTTACGTCTGATCCAATTTTCTAGAAAAAACCACAGAAGGGTCATTAATTGTGA…	CP110446.1	Puccinia triticina	95.673	9453	0
TTTGTTGGTGGCCTGGTTCAGTTACATATATCCAATGGCCATATCTATCACAGGGGGGAATCTGTGGCACTCTAGAGAGTGCAAGGCTGTATGTTTTTCTGGAACTCTGTCTGATATCAGCCGTTAAAGTGTTATGGAGCTCCTAAGGATCAGCCCGTAGGCAGGCTGCAGCACAGTGAGGGGAAAGTGCTCTACAGCTTCCCTCATGGTTTTCCATAAAGTCTCCAGTGGAAAATAATCAAAAACAATGACAGCATAGCTGGGGGGGGGGGGGGGGATTTGTTGGAGCTGACAGAGGGAGTGCATACCCTTGACAGAGGTGTAGGAATGAGAATGAGAGAAAAGAGGACAAATTAACAGTGTTGGAGAGGCAGAGGATCACAAGGCCAATGGTGAAAG…	CP110425.1	Puccinia triticina	93.428	1613	0
TACCAATTGCCCCGGCTCCCAACAGGTACCGTGCAAACTTCTTTCAGTAAGGTGTGTTGGGTACCTTAGCATAGAGGTGATGATCTGTTAGCAGTTAATTGTATAGGTCAGCGTTGCACTTGTCAGTTTCAGCGACGCCAGTCAAAACTCACTGTCAGCCAAGCAGAAAGAGTATGGCCTTGCACTTGTAAGTTTGAGCAAGGCCAGTCCAAAACTGCCTTCTCCATGGCCTCTCAACCGCGTGGATAAACCGCCACATGAAGAGGGCACAATGGCGCGTTACCGGTTCCGAAACAGGGACCCGCGCAAACTTCTTTCGGTAAGGTGTGTTGGGCAACCTCAGCATAGAGATGATGATTCGTCAGCAGTTAATTGTATAGGCTGAGCGTTGCACTTGTC…	CP110446.1	Puccinia triticina	93.416	2901	0
TTTAGGCTTCATCAATGATGTTTTTGACCTCTCGGAGGGAAGGACCGTAGAAGAGGCCAGGGCGCGATTGAATCAGATAGGGAAGGAGTCGCCGGTGGGGGTAGCCATGGGGTCATCTTCAATAGCCGGGCAAGGCACAATTTGTGATCTTCACACATTCAAAAGCGGCTAAGTCCCCTCTCCTCTTTAATGACCAGGAATTGGCCCTGCAGCGGGATGTCAAATGTCTGGGCCTTTGGCTTGATGAGAAACTGACGTTCAGGAAGCAACACGCACAGGTTAGGAAAAAAGCCGATGACACCTTGTAGGCCAGCTCCTTAGGATCGGCAGTCTGGCGTGGGGAATATGGAGCAGGAGCGCGGGATTCTGATCTTGGCTGTTCTTGTGCCCAGGGTTCTC…	CP110425.1	Puccinia triticina	96.339	1120	0
CATAGGAATGAGGTATGGGCTTTTTTCTGGAGGCTACCATTGAGTCTACTGAAGGCAGGCCCCTTTGAAGCTTTAGGAATGCAACAGGGGCCATGATGGCACATGTGTCTTGTGGATGTTGATGGCAACATTTCAGAAAAATACCCTGAAAGTGCAGCAGTGTAGCCACCTTGGACTCTAGTATGTTATAAAATTGTCAGATTTATAACACACGGCCACCAGGGTTGTATAAGAAATCTGGTGGAGACAGGGGGTAAATTGGGGTTTCAGTTCTAAATCTGATGATTTATCAGGTATAATTTGGTGCCCAAATGGGGCCTAATCAAATCAGGACCCATTTTAAATTTCATGCATGTCTTTGTAAGTGCAATTTTAATTTGACGTTGCACACTTTGTACA…	CP110446.1	Puccinia triticina	92.006	2827	0
CCCACATTGCTCTCCCCTGCCCCTTCCCATTTCCCCATTCCCTCTCCATTGTATATACAGCAGGGAGTACTTACACTTCCCCTGGACTAGGTTGCAATTTATCCAGAGTTAGGTTCCAGAAGTGTCCCTCCAGGTCTTACCTTGTACCACGCCCCCCTTGAGCCTCATAGCTCCTCATGATCAGTGAAGCTTGATTGGAGAGCTTACATTCAGAGCTTCGTTGGATGACCCGGGTACAATCCCATCATCTACGTGGACCCAGATGAGACACGTGTCGCCTCATTGCTCAAGGTGTATACACTTGAGTCGTAGTAGCTAGACGTGTAACCAGATCCGCTAGAGTTTTGCTGAGATGTTTCCACCAGCAACGGGCTGCTTGTTTTGTGCCGTAGAGTGCCC…	CP110446.1	Puccinia triticina	93.541	1672	0
AGATGGACTCGCGTAGGTGGAGGTCGTCGGCTGGCGTCGTGGTGGCGTCATTGGACGAGGCCTGCCAGGCTCGGCGTAGGTGGAGGTCGTCGTTGGCGTCGTACATGGCGTCGATGGCGGAGGACCTGCCAAGGTTGTCACCTCAATCTGCTCCGAAGATGGACCAGTGGAAGACTGGCCACAACGACACATGTGAGTGGGTCGGACCAGTTTGAGCCCGAACTGGCCGATGACGTGGAGGATTTGGGCTTTAGATGTTAGGTTCCATGAAAAGATCCGTTGGCTTCTGCTCCGTGGTTTCGTGGCCAAGTAGATGTTGGGGTGGACGAGTGAGTATATATCTCCTTTTGTCCTGGTCGAATAATTAATAAAATGGCCGCAATCCATTCTTAGGAACAG…	CP110425.1	Puccinia triticina	90.785	5936	0
CATCATTTGTGACTTGGATTTTGGTGGAGCTGAGGGTTCAGGGTTGCTCGAGGGTCTAGGATCGGTTTCAGAAAGCTTCCTTCGCAGATGCTCTTGCCATCTCAATAGTTTTCTCCCTGGTCGTCGAGCTCGCTCTGAACCTCATGGTTGACAAGCCTAGATTTGTTCCGATCCATCTGTGGAGGGTGGGACCAGGAGGATACGTCTGGATCAAGTCATTTTGTGTTGCTTGCGGCTCCCTGGGACTTCTTCTTCTTTGCATGGGCACGTGCCTGTTTCTTGGCAGCTTGATATGTACCACAGACCGTCACATACATCCACTTCAGTCAGTACAAAAAACAGAGCCCAGCAGTAAAAAATGAGAAAAATTGAAACATTTACCATTTTTGACTGCCTTGG…	CP110446.1	Puccinia triticina	93.974	1062	0
GGCGGGCATTAGCACTCCATCTTTGATTGGAACAAACGGCTTGGTGATTGATCCTATGGAACAACCGGCAAGTTTGCACCACTGGATCAGATTCAGGCAGGCTCTCATCAGCTCGAAGTATGGAGCGGATTTGGGCTGGTACTAAATATGTATATGCAGAGGGCACACCTGAGCATCATCCGGCAAGTCCGGGCAGGGCTGAGTCTGTCGAGGCCATAGACCAGGCGGTGCTTTTGTCACCAAAGAGGGTTGTGTTGATGTTGAACCCACAATTGTGCCCGAGGGAACGCCAAGCTTGAGCACCACCCTTTAGAAGCCGAGCGAGGTGCGGAGCTCGATGGATGATGTGGAGGTTGGCGTGCTGTGGATGCGGTGTGGGCCAGGCAAGGAGGAGGCAGG…	CP110446.1	Puccinia triticina	93.882	5459	0
CCATGAAATACAGGATATTTCTCCGACCCCCTCTGCATGTTGAGGCATGCCCCACAGAGGCTTATTCAGTTCCACGGAATCAATATATTCACCGGAGCCGCCGCTCACTGCGAAAAAAAAAAGCGTTACCGTTCGTTTAATCTGCAAGTAGAGATGATTCTTAGACGTGGCTGGTGACGGGTAAGACGCGGCCCAATCCCAGTTCACGTTCGTGTGTGAGGATCTCCGATCGCGAACTTGGCAAAGTATCTGTCTGAGGTCTCTCTTACGACTCCGGTTACCGTGTCTTGTTTGCGAGTACGTTGGCAATAGACTTGAGGATGATCGGCTTATCATCCGGCTTCTCGAAGTTCTCCGTTGTGCCTATTTGTTCCCGCTCAACGAGCCATATCTCATACA…	CP110446.1	Puccinia triticina	96.881	994	0
TGCCTTGCCAATAGGTTAGCCCTGGGTGTTTGCGGACATGTCACAGTCCAAGGAGCCCAAAGCATCATTAATTTCCTCATTGGGGGTCAGCAGATGAAGCTCAATTCCCAGGTCATTGAGCTGAGGTCATAACAGGCCCTGGAGCATCCAAGTCTCGGAATGCTCAACAACAAACCCTTTTTTTTTCTTAACTTGGCCAGACAAAGAACAGAGTCACCTGTTTTCCCTTTACCAGCTTGCCCGCCTGGGCAGAGATCGTGGCGTCACGCTCCTGAGCCTCAAGCCACGCCCTATACACAACGTCTGAGCCAAATCCTGAGCCACCACCTCATGCCCTTCCATTACCTCCCGTCCTCCTGCGATTTCTAGCGTGTTGTTACCCTGAGTCTCCAGACAATA…	CP110446.1	Puccinia triticina	96.368	1294	0
GCTGGTTGTTTATTATTGCAAGAACCGGAAGTGATGGAATTCGCAGTGCGAAGGCGGTAAGTTTGATCCTCCTCCAAAGCCGTGATGACAATCTGATCAAAACTGAGAGGAGTGCCACATCGTCGTTCAGCGGCAACGACCTCGACTTTGTCCTTGAGACCGCGATTCAAACGAGCTACAAATCCAGAGCTAGCCTGCACTAGTGAAAACCGTAATTCTTTGCCTTATGCTGCCATTAGCAAATACTGAAGAAGTAGCCGTTGATTGGGTTGTTGGTAAAGTTTGTCGTAGTCGTTAAGAATGGAGTCTTTTGAGACGCAGAGGGTTCAAGTCAAGGAGCCAAGAGTAGAAAGAGCGCCCAATTCCCTGGGCAATTACCAGAATTGATGGCATCTTTGT…	CP110442.1	Puccinia triticina	90.922	2148	0
CTACCATTCTACGTGGCCCAGCTGGATGAGAGGAAGCGCGGGAGGGCGGGCCGCCCCCCCAGGAAGCTAGGCCGTCCCGGCACCGAAGCAAAGACGGGCGGGCGGGGTGGTGCCTTGGGCACAGCAGGCGTGGAGATGACGGGAGTCGGTGGTCCGGACGGAGATTCCCCTGACCGACCGCAGACTTGTGCTTGGACAACCGGTTGGTTGCCTGGGCCGCCAACTCGGCCAAGGAGTACACGACCTCCTTCTCAGAGAAACTGGTCGGTTTTAGGTGGGTTATCCCATCGACCCCGCGCGCGCCGTGCAAGATCGCCATGCTCCACATCTTATACCCATCGGCGGTCACACGGGAAGATCTCGCAGGGGTCTGCGGGGTCCTTGATGCGCATCGACTCT…	CP110435.1	Puccinia triticina	96.296	2457	0
CTTCTCTGTCAGCCACTGAGAATAATTGTCCATGTGTCTACAACTATAATTACAAGTCATGTAACCCAATGGCTAAAGGCTACCTTAAGATTGACCTTGATCTTGTGTAAGATCCTGTGTTCAAGTCCTCCTGTTGTCTTATAATATTACTTTTGTTGCAATCATCACTTTATATGCATGCAGTTATGATTTCAAACTTATTGTGTATTTACCTTGCTATCTAGATAATGTACTAAGGACATCTCTACTCATTTAACATACATAGAGATATTACATAATTATTCATGTAATTCCTCCCTCCTTCTAATTACGTGGACACTGGTCTTTTCCTCCTTGGAGTTAAGGATCCCTCTGGGGCTCTTGACTCAGGCAGGGTCAGGTCCCTGGGTCCCCTGTAAA…	CP110442.1	Puccinia triticina	90.246	1989	0
ATGTAGCCTATTCATTCATGGTCCTTGTTGACGAGACTAGTGTCTTCACATCTTCTGCAAAACTCGATCAAGGTTACTCAAGCAATAATAAGAAGATCATAAACAGAGAAATCATCCATGAATACCTCACAAATCTTTTCACAATAGTCATAGAATATAGCCATCATGCATCTTTGAAAGGTAGCAGGTGCATTACATAAACCAAAAGGCATACGTTTATAAGCAAAAGTACCGAAAGGGCAAGTAAAAGTAGTCTTTTCTTGATCGTCCACTGACACAGGTATTTGAGAGAAACCAGAATAACCATCTAGAAAGCAGAAATGTGTATGTTTCTGGATGGTCTCTCTAGCATTTGATCAATAAAAGGTAAAGGGTAATGATCTTTCTTAGTAGCTTTAT…	CP110442.1	Puccinia triticina	93.028	1793	0
ACTAAAGTTTTTGGATAATCAGGAAGCCCTACTTACTAGCTAACCTGTGATGCAATAAAATAACTGTAGGTCTTTCCTTTCCCGGTTCATTTAAACAGCTGAAGATCGTAGATTACAACAGCCAACCTGAAGGACCCTAAATCAGTGTTTTTAGTGCCACTCCACACACTTTCCCCGAGGAGGCACCTCAACAGTTGATAAGCTGCAGGATGTTTGGGGGCACAGTCATCGCTCACTCCAAATCCCAAGTGTGCAAGTAAAAAAACAGTGATGCACTGATTGTTTGGCCAACATGGAGTTTTTTTTTTTTTGGTTTGGGAAGGATTAAAAGACGCAAGAAAGTGGCAGGATTTTTTGGGTTTGGGAAGGATAAAGAGCACAATAGGCAGGATACAATCA…	CP110424.1	Puccinia triticina	94.503	1419	0
TGTGTGACGCCTTCAACGACTCGTTGGTCTTGCTCAGGCCAACTGCCCCCGGAGCCGTTGGAGATGCTGCTCGTTCGCTCCTGCGGGAGGGGCCGCTGCGGCCAGCCACAGCGAGCCTCCCCACAAGGGGGACTTGTTTTAAGTTAGAGATAGCCTTGGAGACAGCCTTGATCAGCAACCTGCCTGCAAACCCGGGCTCACTTGACTGAAAATATCACAAACATATATTTAAATATCTATGCAAATGCTTTTAGTTCGACCTCGAGCTAGAGAGGGATGGAAGGGTTTACAATGAAAAATTCTTCGCGTTTTGATATTTAAACTTCCCGTCCAAAACCCTGGAACCAAGGCCTGCAGCATGTAGGCTCACTTGCACATCCTTGGAAATGGAATGGATTG…	CP110442.1	Puccinia triticina	94.341	1131	0
ATGTTGTGGTGCCTTGATCCTAGTATTGCTAATGACCTCGTCTTCCTAAACTCCTTAAACTGGAGCATTAGAAAGGTGCTGAAGGACGGCGGAAGCTTTCGTAACGCAAAAACTACGGCCATTGCGGTGAGACCATCCGTTCCAAACTTCTTGGCCCCGATTTCACAGAGATGTGGATGAGCGTGTCATATGGGATATTGACTTGTCCATGTCAATTTGGTGGAAATCTTCTATATGAAATACTTGTCCATGGCGCTGGCGACTTTCCATAGTCTTGGCCATGAAATGAGCTTCAATGGCATCCACAGCTTCTTAGCATCATAGTCAGTGAAGCTGGTGACGAAACGTTCCAGGTTGGCAATGATCATATGCATCCAAATGAAGTTAGTTGTCATTTTG…	CP110424.1	Puccinia triticina	95.24	4517	0
TTAAAAATGCTAAGACCATACTGGCTTATCTATACCGTATGGCAGCACATATCCGTTACAGGATCCTGAATAAGAAGATCACCAATTGTCCCTTAACAGCACTTTATGGAATTGAAATCAACCCAAATGCGCTATACCCTTTTGGAGCTGAAGCCATAGTCCATATACCGTTGGAAAAACGTGACAAGCTGTCGAAGCGCACATTTTGGAAGACTCATTGGTTATCCGGCATCAGGAGGTGGCTGGCCAGCATTGAACTTGTCTCACAACGGCAAGGACCCTCTTCACTCAGCCTAACCTTGAATTTCAATCCCTACCAGTGAAAAGAAACCAGTGACCAAGGGAGATCTCGATTTCATCACCAGCCAACTGGTACTCAGGCTGGGCGAATAATACAGT…	CP110424.1	Puccinia triticina	91.139	1941	0
TCACCAATTTTTATTGTAATGTATGTGCCATCTCCCATGGGAATTTCTAGATTTCTGAATAAACCTTGTCAAAATCATTGATATCAACAACCCGCTGGTGCTGGGTTTCAGTGAATTTGGATATCCGTCGGTATAATGATATCAAATGCATTTCCAGTTCATGTGGATAAATTTCTTGTGAATAGCATTTTGAATACAACTTCCCCTTGGCCTTGTAAGAAAGGTGGGAATCACCACTTCACCTGATTTCAGCTGTGTGGGTTCATATATGTAAGAATGCTTTGATTCAATGTGCACCATTTGCACCTGCATTTCACGTGAGATCTCTTCCCTCCATTGAAGCTTTGACAAAGGCTGTCAATTGGATCGCCACATGGGTCATGGGGATAAATCGGCAAC…	CP110442.1	Puccinia triticina	92.255	736	0
TTACCATTTAGTTGTCTTTCCCTCAAGTTCAGTACCCACCAGTTATACAGATACCAACCCTGCACCCAATTTACAACCCTTGTACTTTATAACATACCATATCATCCCTCAGACCTGCAATAACAACTTAACTCACTCTCATATCTCTTGGTCACATATCACGTGCCTGTCACAAGTTCCCTGGTTCCTGGTTCTCCCAACTTGAGACATATACACTTCCCAAGCCTAGCAACTTTAACTTTATATTACCCCCTTGAGAACCTGTGTTCAACCCCCACCAGAATCATCAAGTCAACTTTACCTTTTCGACCATCATAAACTCTCAATTCTATAAAATACCTGTCATCAAACAACTTCATCTGGAACTAGGTCAGACCTATCACTTGAATGCCCCAAGCT…	CP110442.1	Puccinia triticina	95.492	1686	0
CGTCCATCAAGAACGGGCGCCCCAAGATCAAAGGCCCTTGCCATTGCGAGTGATCCAGAAATGACAAGTCATCAACCGTTTTCCCTACGCGGATGGGCACATCTTCCGCCACACCTATCAATTCACAAGCTCTATTGTTGATGCCGTAGACGGCTGATAGGAAATTAACTCGCGGGCTCAAGTTTGACCTGTTTGCCATCGAGTCCGAGATCAGGTTAAGCTGGGATCCCGAGTCTATGAGGGGAGTCGCAGGTGTTTCATCCTCGCCTACAAGACAAGACAAGTACCCCAAGGGGCAGGAGTACAGGTTTGGATCCCCTGCCAGCTCCCGCCTCTCGTCCCTCCGCCAATATGCCTGAGTTAACTTTGACTTCTTCGGATCCGACCTCGACGCGCCGA…	CP110445.1	Puccinia triticina	93.544	1487	0
TGTCCTCTACTTGGTTCAAGTACGTATTGCTGACTAGGCATAGCAGTGTCATGTGTATGTATGAGAGCCACTCCGCCTGCCTGCCACTGCCCACTGCACCCACACCACCAGCCATGAACCCACACCCCCCCCAGCCACCACACTCCCTGCCCCAACTCCTGCCAACGACCACCACGACCACCACCACAACACGAACAACCTACTACCAGCCACACTCAAACAGCTCATCAGCAGAACAGCTGAGCCACCAGCCAGAAACAACGCCACTCCCACAGCGACAGCCCCAGAACAACACCAGCACAAACTGCCAGCTGCACAGCCACTCGAACTGCGCTCCTACTCAGGCGTACTCGAAATACGCCATACCAGCAGAACAGCAGCAACAGCAGCAGCAGCAGC…	CP110442.1	Puccinia triticina	91.897	4344	0
TCCAACCCCATGACCTCAGGTCACTTGCCTGAGGTTCTGCAATGAAAAGTTCTAGGGTGAAAATGTCAGCTCACCCATTGAACAAAAGGCACTAGGTGAAAGGCCTAGCCATTTTTGGAATACATAATTTGTGTTGCAGTTAGATTCCCAAAGGGAGGACGAGGGAGGACGAGGGAGGGCCGCCGCCCACAAGGACCCTCCGCCACCCTCCGGTCGAGACCAACGCAATGCGACCAGTGTTACTACTCTGTATGATCTGCTTCCCAATCCCGCTGAACATTCACCAGAGGATTGCTACATGAGCTAGCAGATAATTAAGCGGGCATGAACAACAGATACATGAATACATAGAGGGCTACCAAAACTGAAAGCAACAAAAGGTTTGAAAATGAAAACTGC…	CP110442.1	Puccinia triticina	95.089	2749	0
TGTGGCTCTGGCTGGCACTGCATCCTCACAAGCGACACATCGTACTCGATCGATTAATTATCCTATGGATGCTCGACCTTCGACCTGTACGCCCACCACCTCCGCCTGACTTTCGCCTCAGGTGAATCTGCTCTCCATCATCCGGGGAATACTCAATGAACTCGAAAGACTGTGGCGTGGCTGCCGCCGGGGAGTACATCGCCACCCTCATCGCCATTGTCTCGCTCTTTCGCATACATTGCCACATGGTCCTCACCATTCTTTCGTAACTGCCGCCTGCAATCTTCCCGATTCGTTGCTGCATCCTCCCCATAGATGTCCTTATGAGAGTTCCGGTGCTAGCTTCGAAGATGGGAGAGACGATGGTTGTAACACCCCAGATGTAAAGCTTCCATATTT…	CP110442.1	Puccinia triticina	96.395	1276	0
AGGATTGCTGAAAACTGGGGAGCAGGGCTTTTGTGAGACTTACCAGGCCGAGCTAGATTTCGCACACAGGCAAGTTGAAACTGCACTATCGTCAAATTTACCGAATTGGTTCCTTGAATGTGTGCATTAAATCAATCATTAGAATAGAGTTATTTTTCCTGCAATCCATTATTATCACGACTTAGAAAAATAATGACACTACGCAATGACTGCAGTTAAACTCAAATTTACCGCTCTGTTTCTGACACAATTCCACGCAGCTTCGGTCAAGGATTTCCGCCTAAAGTTATACTTTTCGGTGACCAATCTAGCATTATGAACTTTTTTTGATCACATGTTTCAATGATATCTATCATCTGCCAGAGTCGTCACAACCAAGTTTCAATGCTATTCCATGAC…	CP110442.1	Puccinia triticina	98.013	755	0
CCTTTGATCTGACTCATCCAGGCCTGAAGTATTCTATCACAGATCTGTTGGTCTGCGGGGATAGCTTGACCAACTTCAGATTGAGGCAGAGTTTCGGATCCGGAAATCCAGGTGGCAATTGGTTTAGATGGATTGTGACAAGCAGACCAAAAAGCGTTCTTCGACATCATACGCCTAGCCCGAGTGTTCTTTTCATAGGCATCACATATTGTTTTGAAAAGAACGCTGACCGGCTTGAGATCTTTTATCTAATGGCCAGATCAATTGACAAGGTCATTTTTAGTGTTGCTCAAGCCACATCGGATAATATCTAGTTGGAACCAGACTCTTTGGCGTAGTAAACTCGTTGGGAACCCAAGGTGATCGGTTTGTTGGCCGTACTCCTTCCAGTCCGTTTCC…	CP110424.1	Puccinia triticina	95.122	1722	0
TTGATTGGCTTCGCTGTGATTATCGTCCTCCAAGTGGCAAGCAATGACCTTTTGGAAAATCCTCATAAGTACGTTCACAGCTCCCTTTCCGCGGACCTTTCCATGGGGAAATGCTGCACGGAAAATTGGGTTGTTGATGTAATTATGAGGATTTCGATTAACTATTTTCCACGGATGACAGCGCTATGTAGCCGTCTAGTGAGATCAAGGAGCCACATGATAGCAAGAACCCTCGTTTTTAACTGGAAATCAACTTCTTGGGCCATGGGTCCCTTGTGACTGAGCCAAGGTAGCAAATACCAAGAAACCTGAACGCGGGATTGATGTTTGACTTTGGTTTGGATTCTGTGAAGCTAGGGTGCTGGTTACTGGAAGTGTCAACCATCCTTCTTCCACGAA…	CP110424.1	Puccinia triticina	95.27	1036	0
TCTGAATTGCCACTACATTCCACAGGAGAATAATTTGTAGAGCTCATTCTCCATACACTAGAGAATATATAATACATTTCTGTCACATTAGGGATATCTAGTCCCCATGATCCAGCCAACCCAAAGCAGTACTTTTTCAAAAGAAAGGTCAGAATGAGTGTTTTTCAATGTGGTGTTTAAGTGATGCGGTTGGGAGATTTCCTCTAGAGTGCAAGGCAAATTGCAATTGGCTTCACCAGTTCTTGTAGTGGGAGGTTTGCGGCCAAGGCTGTTTTCCGTTTGATGATTTCAAAATTGGATCCTGGGTCTTATCATTGCTCACTGTGTCCACACAAGTGTTCTAATCAGGTGGAGTTGGATGTATTATCCAGAAGGATATATTGGAGAGTAAGGGAGGCC…	CP110442.1	Puccinia triticina	94.226	3464	0
TCCAAAGTGCATGTTGCTAGTAAGCGCGAGCCTGTGGGCGAGTTGGCCAGAGAGAGAGTCCGAGGAGAAAACGCTTACCGGTAAGACGCCCTGGTCCATGTTGCCGATGGCCTGGAAGGCTGAGGGCGAAAGATGAGGGAGAAAACTTAGGAAGGCACAGCCAGGACACTGGGGAGCGGGAAAGCGGGCGCGCAGTGGGTGGGACTTCGGGGGCATCATCATGAGCATGGCTGTGAGGCACGTACCTTGTCGGTCACCTGTGCTTGCACAGTTTTCCCGTGGCATCATTTATTGATGGAGACCGTCTTGTGGCACGGCGAGCCGCCCTCGTACTGTTCCGAAGAGGAGCGAGGAAAGGTGGGTATTTACTGCCAAGCCAGATGCACACACAGAGGGGCA…	CP110424.1	Puccinia triticina	92.109	17539	0
CAGAAACGTCCGCGGGATGCAGCGCATTCCAGGAATGCGCGGGATATACCAATGTGTGGGTCAAGTGCATGAGGAAACCTCTCAAGCTGGTGAAAGGCTCATAGCACTTTCCTCCTGCGCGGCGGCAGCTCTGGCACGAGTGGTCTGTCCTCTGCGAGACAGCTTTGAGCGCATAGCAGGTTTCTTAGGAGGGCCTAATGTGAGCCCCAACTCCTCTTCTCTACTTTTCTGCTACCTGCTTCATTTACACCTTATCTTCTTTGTGATTTGTTTCACTCTTCTCTTCCTTCTTCCCTTGCCTTCCCCCCCCCCCCCCTCTCTCTCTCTTTTTTAAGGGAGGGAGGGTGGTTGAGAAAATTTCTGAGGCAAGAAGTACGCTTTTGTCAAATAAAATAGTGA…	CP110442.1	Puccinia triticina	96.061	2640	0
CTACATTCCACAGGAGAATAATTTGTAGAGCTCATTCTCCATACACTAGAATATATAATACATTTCTGTCACATTAAGGATATCTTAGTCCCCATCTATCCAGCCAACCCAAAGCAGTACTTTTTCAAAAGAAAGGTCAGAATGAGTGTTTTTCAATGTGGTGTTTAAGTGATGCGGTTGGGAGATTTCCTCTAGAGTGCAAGGCAAATTGCAATTGGCTTCACCAGTTCTTGTAGTGGGAGGTTTGCGGCCAAGGCTGTTTTCCGTTTGATGATTTCAAAATTGGATCCTGTGTCTATCATTCTTCACTGTGTCCACACAAGTGTTCTAATCAGGTGGAGTTGGATGATTATCCAGAAGGATATATTGGAGAGAGTAAGGGAGGCCATCACGGCTTTT…	CP110442.1	Puccinia triticina	95.206	3463	0
CCCTGGGACAAAGCCTTCCCCACACCCTTTAAGTATCCGACCAGCTGCACACGACCTGGGCCTCCAGCTGCTCCACCCTGAAGGTTGCCAGGGCCCTGCGCCTGGGCAGGCACAATGCTGGCTTGTACACACTCATTCGAGTGGTTACAGGTCAGCTCGAGGGCCTGTAGAGGGGGCTCAGATGTATGAGTACAGATGGTCTATGACCAACTGGACCACCGGTCTGTACTGGTTATCTGCATTTCCCCACGTCGTCGCCCCTTCAGTTTTCAACTTTCGCCTCGTCTTTAACTTTCCTTGTGCTTGGTCACTTGATCTGTTTCAACATTGTCTATATTCTTGAAATAAATTCCTCCACGGCTGTATTGGCAACTTCAACTTCACCACCATCCCCACTTC…	CP110442.1	Puccinia triticina	94.72	1610	0
GGGAGGTTATAATCCTTTTCTATCCCAGGGCCACCACAAAGGGAATGGCATGGGTCGATTGTTCAGCCTGCGCAAGTGCAACAGGGGAACCAAACTTGGTATTGTGAACCTCCCGCTGTGGAACTACTCAAATGGGAGAATGAGGCTGGGAAGGGAAATGTATGACTAAACTAGTACTAATGTAAGCTATGCCAAGGATGCTGATATAAGAGCTGCCTTCCTGACTAATACTACTGGGGATGAGTGTAACACTAAGAAAAAGAAAGGTGTGGCTTTACTACTATAATCTTAGACTGACTAATACTATGAGCTGACTACTTGTACCTGTAGGGTATGAAGGAGGTGGGAGGTAGCGAGTGAGAAGAAGGGGGATATATTTCTGGTATGTATGAAAGTGTA…	CP110442.1	Puccinia triticina	96.139	2098	0
TTGGCAGTATTTGAGTCAGATACTGTGAGAATATGAACAAAACTTTTGAAAGAAATGGAGAAAGGGGGTCGATTGGCTTCAGGTATGGGCTTGGTTCCTCAGTTGGTGATGGTGGTAAGGGAGGAGTGCTAATAATGCCTTGTACGCCTTAGTTTGTTTTGGTTGTTTAGCCCTTTTTGGCGGTGGAAGGAGTCCTGCAAGTATAGGCTTGTCCCGTTGGGTCTCTACCATAGCAACGGTCCGGTATGCATTGAGCCTCCTAATACGAGCAGCAAGGGAATTGGGACGACTATAATCCCATTAACAATGCATTTATTGTCTGGTTGTCAGTTTCCAATTCCTCAAGCTGTGGGCTCTGCAAAGACAGGGATTTCCTCCCCGAGGAGGGGGATCAGTAAT…	CP110424.1	Puccinia triticina	93.29	2787	0
ACTTTCACAACCTGTCACACTTCCTATGAAGCTACCCATGTTCACCGGCATCCGGAACTTGAAATGTCCGTTGTTTTTGGCGAACACTGGCAAGCAGCTGTTCATCGCTTGGGTACCATGATTGAAGTGGGAAAGCTCTCTCTGTAAAGCTTTAGCCTCGAGAATGCTACGCCTGCCGTCTCGTTTCAACCGAATCTACGCTTTTCTTCTGCCCACCTCGAGCATATTGGCATCATCTCTCTAAATTTCACTTGCGCATCTGTCCTCGGCAACCGAACCGGTTCTAGAAAATTTGCTGATGTCAGCCAAAATTGAAAACATTACTGTTAATACACGGCAACGGCTAGATACCTCAAACATAATATTATTAGTATCACTCGATAGTATTCATGTCAGCGT…	CP110442.1	Puccinia triticina	92.984	3777	0
GGACGGTAGAATAGTAGTAGCATCCTGGGTTTCGAGTTGATCAAAACGATGGTCAGAGTCACTCATCAATCCAATGCTGGCAAGAATGAAGATACTCAAGTACATCATACACACCTGGGGCTTGTACTGGGCAATACCTGCAGCAGACAAAAATCAAAAAGAGGTAATGGGATCAGGAACGGAGGGTGGTGCTATGCAGAAATGTAAAACTGACTTTCAAAGTCCCCGGTGTCACAGACAACGGTGGTGTGTTGTTTGAGGTGATCAAGAGAGGTGGTCCTATCATCCGATAACGTCGGAAAATGAAAGTCAGCTGGTAATCAAGGTGGCGAGGGGTACGAAACAAAACCCCCGAAGAACCGAAGGGATGAGTCCCGAAGAGCAAAGTCTCAGGGAAAG…	CP110424.1	Puccinia triticina	93.819	2168	0
GGTCCCATCACTCCTCAACCTCTAGAGGAGGAAATCGATACTTCCTTAAGGTCATCGACGGCTTCACCAAATATCGGTTCATTTATCCAATGCGGTGTAAGTCTGACACCTTCCGATTCTTCCTCATCTTCTTGAATCTGGCCGAAATTTAAAATCAGTTGTCTCCGACAACGGTGGTGAATTCTGCAACCACCAATTCAAGATTTTGTTTGAGTCTTGCGGTGTCCAGCATCTCACGTCCGCGCCCACACCCCCCAGCAAAATCCATTGGCCGAGCGGGGAAACCGAACCACCATTGAAAGGCTCGACTCTTCTCATGACCAGTGGACTGCCCCTCCAGTGGTGGGGCTAGGCTGAAAACTGTCAGTCTTTCTGGATAATTGTTCTCCGACAGCTCTA…	CP110446.1	Puccinia triticina	93.77	3130	0
TCGTTCTCATCGGTTAGTTTCTTTACGAGTTTTCCTTGCCTCAAATAACTACCTTCCGCCCCTCTTCAAGTCCATTGTAGTGGCCTCGCGACTGTTTGGTTAGTTGATTCTGACATGTTCCGCTCATCACCCCCAACCACCCAGCGGCTCTGCCGCAAACCCTGCTAGTGGTGAGTGGCCATCATTTCCGCCGTCAAGCTGCAACTCGAAGAGACTGGCTGCTTGGCCACCAGGTTACGGTCCTCAAGGTGGCGCCCAAGGTTACGAGGCGTACGCTCAGCAGACGCCTGCGTACGCCCAACAGCAACAACAACAGGCCCAAGCCCAACAGCAGGCTGAGAACCAGCCATCCGCCTTCCCTGTCGGCACTGCTACCACTGCCTCCACCACCCAAAGCGC…	CP110444.1	Puccinia triticina	94.676	2066	0
TTATGATTAGGCTCACCACACTGTTGACCATTGCTTCCAAAGCTAACCACTCCGCTCTTTCCTTTCCTCATCTTGACACCCATCTTCAACCCGCTGGAATCTATTGTGCTTATCAAGTCTTCCGCAGGATCTTTGTTGAGGTCATCAGTCTAGGCGGCTGTATCATAGGTTATTATCCTTTTCTTTCTTATCATCCTGTTGACCATGTTTTTTATCTAATCACACCTCATTTTTTATTAGCCTGTTCCTAGTGTGTGGTTGTGGTTTCTATCAGACTTTGTTCTCATCTCACATTTTTCTATTTATGTTTCATTTAGGTAAAAACCATTTTCTATTGTTCTCATTTTATTTATTTTTCTTGTCATTTATTTACTGAAATCTGTTTCATTTAGCCAAACT…	CP110444.1	Puccinia triticina	94.914	8848	0
AAAAATGCGCTGCGCCTCACTGACAGCGGCGCTTCCGCTGCGGCAGCCGTCAGCGCTCACAGCGGAAACAGCGCGCTGACAGCTGAAATAGCGGTCAGCGGCAATTCAGCGCAATTTCCGCTTGCGCTGCGCTTTGTCAGCTTTAGCGCTCATTTATCCGCTGCGCTAAAGCTGATCACCGGAAATTGTCAGCGGTATAAACGCTGATTGGGCTGGAGAGTCAGCGGTGGACCGCTGCGCTGCGCTAAAAGTGCCGCTGATGTCAGCGCAGCGCAGCTGCTTCACCCTTGTTCGGCCTGAGAAGGAGTCATAAAATCAGCCTCTTTGGTCTGTACAGAAATGTCATGGAGAGGATCCTGGAAAAGATGCTAAACTCACTCCAGGTCTTGGCATTGTAGC…	CP110444.1	Puccinia triticina	96.612	1033	0
TAATGCATTGCTAAGACTTGAAATGGTAAAAAAGAATTTTGACTCAAAAGTGTTATGATTTCAACTTTGAACACCCTTCTTATTTTTGTAGTTTACAAGGCAGCCCAAAAAGCAGTAGTGTACGGATTATTGCTGCTCTAACACTGAAAGTAGTGGTTCCCCTGGTTCTTCCCCAAGCAAAAAATCAATAGTTCAGCAGACAGGCCACTACTTTCAGCATAGTTCAGTGACAGCAGCCACCAAGACCACTGCAATTTCTGCAGCAAAGCAGTTTCAAAATTGGGGAAAATATCTTAAAGATCCCAATTGTGGTATTGTGATTTGTACATACTTCAAAAAGGCTGCCACCAAATATTGATCCGGGTGATTGTGTCAAGACTGCCAGGAGCAGTCAGATGA…	CP110427.1	Puccinia triticina	93.068	4126	0
ACCTTTCATCCTCACTCGTGTACGTACCTTTTATTTTCACATACCCCGTCTATGTATACATTTCCACTTAATAGCCCCTTACACGCACATACCCCTTTTATTATGTGAAAATATCCCCTTTATGTGTAAATACACCTTTTCACATTCCCCTTTCACGCTTACACATCCCTTTCAACTGAAATTGATGTTATTCCTTTTATGTGGAAACACCCCTTTCATAAGTGCAATGCACTACATTGTTGATGATGGATGAACCTGGAAAATATGAGCTCTGGAAGACTTATGGAACTAGAGGGAAACCCAGTTCAAATCAAGTAATATCAAAGTTATTGCATGTCAACTGACACCAATTCTTGAGTTTTTTTCCCACAATATGGGGGCTGAACAATAGGAAACCTA…	CP110427.1	Puccinia triticina	94.77	1931	0
GTAGCCATGTCATCGTAGCGAGGTTTGATCTGAACCAGAACCCGATTAGTGAAGAAGTCGTAGAACGCCACCGGATCAAGATAGAGTCGTTGCTTCTCCAGTTCGACAAGTCTTGATTTCAAAACAACCCATAGAGATCGATCGTTAGTGATAGTTTAATAACCCATACTCAGTTATTGGGACTAACTCTTTGTTGGGAGATACGATCCTAAAACAAATAATGTCCCCATCCTGTATTTGGTTTCTTGTAGGAAAGTTGCTTTGGGCTTCATCGGATCAATCATTCCAGGTTTGATTTCCTGTCAAATGGACGGGGAAGGAGGAAAACAATAGTGGGCAATCAGACATGATACTTTGATGGACACACCGCAATTAAAACTCGATGAGAGAAGATACGAA…	CP110444.1	Puccinia triticina	94.307	1335	0
AAATTCACTCATTATTATATCAAATCAGAATCTACAGGCCAAGTTATCCTGGTGCCATTTGTTGTTCATTATACCTAGCCAAAATATTTCTCTCATTTTGCTCTTTTTATTCACTATCTGTTTATACATGACTACTTCTCCATGTGAATGGTAATCACTGGGTGTTGCCTATCATGGAGGAAAAGATGGGCTCAAGCCAATTCCTCCTCCCATTCTGGAGGCTAAGTTTACTTCCCAAGCTGGCCAAAGCTGTTTATGCACATACAGAATGGCCTGTTAATCTATAGCCAGGGTCTTGCCGCTCAGATGAATCGGGCCTTTGAGAATTTTTCTTCTTTTTGTTCTAAGTAATCAATAAAACACGCTCCTTAAATTTGTTTTGCTCTCTGGCCTTGTTTG…	CP110444.1	Puccinia triticina	95.597	1022	0
TGTTTTTTTTTTTTTTTTTTTTGCCTGATAACATTCAGTACTTCTACATACACCATTCAATTCTTCATGAAAAAAAGACATTGCAATTTTTAGGATTAATCCAGGGTGGCTAAGGGGTCTCAAAGTTTGTTTCTTTTTTTTTTACTTCAACAATTGATGTTAACAGAAGTCTCCACAATCTACTTTTTTAAAGGAAAAACATTTCCACCCCTGACCTCTCCATGACAGCTCATCCTGCAAACATTTTTAATTTGGTTGATTGAACTTCCTAAGATATTGCACATCATACTTGAGTGTACTTAGAAGGCCTTTTTGAAATTAGTTTACCATGGTTTACACATATTTTTTGTCAGGTTCTTTTTTTTATCTACTTTTATTACTAATATTAACTGAGGACTA…	CP110427.1	Puccinia triticina	91.565	7659	0
CAATGTATTGCTTCCGAGCACGCGAATGAGGAGCCGGACTGGGCAAATCAGAGCCTGATTATGAGGGTTTAGGTTTGAGACTAGGCTTGGCGCGCCCATCCCAGAACCTCATAACCCAGCACCAGACTCCTCTTGCCCCATACCACTACTCATCTCGCACCATCCTCATCAGTTCTCCATGGCCTATTGCTGACAGATCTTTTTTTGAGCCTCCCACCCACCCAAATTGCTGTGGGGCACATCACAGAGTGTAGAAGGGTGTAGCCCAAACCCCTTTTCCACCTTCCAACGGCAGCCACTCCCTCTCTGCTTCAGGAGGAGAATCAAGACACAGACTGGCTCTCACCTAGGAGCTCCTACCTTCCAGGTAGGGATACTCCACGGGTATGAAGAAGCTCA…	CP110427.1	Puccinia triticina	95.388	1973	0
TAATTTATTGCTGCAACAATTTATACTATCCCAATCAACAAACATATCATCCTAAATCAAAAAATTACGACTGATTGTTACTTTGAATGTTTTATTGAGGAGGCCAGGTATTACTAGCTCAGCAGCTCCAAGAAGCTGAAAAGATTCCTCTTACAGAGAAGAAAGACCAAATCCTTAATACCGCGCTTCTCAACTTTTGTTCTATCCTTTTTTCCCTCCCTATCTCTCTACTCTCTTGGACCTAGACGCTTATTTAGTGATTGATGATATAATGGCTAAGCTTTTGTCCGGCTTCTTCTCCACATGATACCGCCACTCGACACCTATATAGTTGTACAATTTTTCATTTGGAGATAAATAATAAATAAGGAAAGCCGCCGAGTTGAGTCGGAAGCTTTC…	CP110444.1	Puccinia triticina	92.812	1280	0
CTTCTTTCTCTGCTGGAGTAGCTGCCTTTTCTCATCGGAAACGAATGCCTTGAATCTCGGTGCAAGTTCCTCAGGTTGCTTGCTCAGTTTGGAAGGCATGCATGAGAGGGGCTTTGCGGGGAAAGGATGGCTGGGTGACTGACGGCCATATGGGATCAGCGGGCTTGGAAGGGCCCTGGGCTGGGAGATCTTGAGTTGAGTGTTTCCTTGGGCGTGTTTGAGGATTTGGAGGGGAGATGAGTTAGGGCTCGGCTTGAGAAGGTGGTTCAGGCATGGATGCGGTGATCTTCATGTTCTGGGGTTGTTTGGAGGCAGCAGTAGAGGAGGGTGGTTGTAGTGTGCCCCGATTCACTGCACCCCTACAGAGCTCCTGGTGGTACGTATGCGCCCTCACTTGGG…	CP110427.1	Puccinia triticina	93.068	1457	0
ATGTGTATACATTCATCGTATTGCTGTTACATACATGTACGCCAGTGTACGCCAATCGCTGAGAATGCGGGTGCTGCTGTCTTTTCCCAGCCAGCTTACGAGTGAACACCTGTGAATGCCCCTCTGGACTTGATCTGTGCTCTTGCATGAATGGAAAACCTGATCAAGTTGCAAATCCCGGGCCAGGTTTCAAGAAGACCATCAAGATTTGGATTTGAGTCTTGACATGGATCTTTTGGCACCCAATGTTTGTCCGGAACATGATAAAGTTATGTACAAGGGTTGTTTAAGTTGGACGCAGGTTTCTGTAACTCAAGCGCATAATTCGGGCTCCTTCATCCTTGGGAAGAATTCTCTCGGTTTTGTTTTATCCGGTGCAGAGCTGTGCAGAGTTGACAG…	CP110427.1	Puccinia triticina	94.087	3247	0
ATGTTGTGTGTATTGGTAGAATTACGTATTGCTAAAAAGAGAAAAGCTTGCCTTAGTCCATGTTGGTTATAGGAGGTAGATTCTTCAATTTGGTCTTTTCAGCCATGAAGAATTGGCTGCAGTGGGTATGTGTTAATTGTGGTGGCAATGAATGTTGTTCAAGCTGGGAGCGGTCAGGTAAGGATTTTCCAGGCAGGTTTCCGTTCTCTAACATTGATGGTGGAGCTGGGCCTTGGTCCTTCATCTCCTAGCAACTGTCTTCATCAGGCAATGTCAGGGTGAGAACAAGAACAAAGGAGTCATACAGTTTCTGGCTGTGGGTTGGTCTTGATGATACAAACTTGTCTGTTTTATGTTCAGTGTATTGTTCCTCAGACAGACTCAAATCCAAGCAACTCT…	CP110444.1	Puccinia triticina	96.471	1105	0
ATGGGCAAAAGTATTAACTCTTTGAGCACCTGGTTCAATTATGAATTGATTGTACTCAGAAATTCGGCCCTGTGGATCTGAAAGATCATCGAGTTCCTTAGTGGCTGCTGGATCCGTGGATCAAGTAGTAGTATATGGCACACTGCCTAGGCAGTGGTACTTGGCATCTGCTATTACGGATTGTGCTTTGGCACACTGCTATTACGGAGTGTGCTTTGGCACACTGCTATTACAGAGCAAAGCACACTCCTATTACAGATTGTACTTTGGCACACTCCTATTGTGGCGTGTGCTTTGGCACTTTCCTGTTGCAGGGTGTGCTTTGCAAAGCGGCCCCTCCTTCAGGGAGGGATTTGCATATAGTCCCCAATTTCATAGGGGAGAAGAAAGTACCAAATG…	CP110427.1	Puccinia triticina	93.447	2533	0
TCCTTCTTGGTCTAGGTGACACTCCAGGACAGCACAGCGGCGTAAAGTCCAACTGGGGAAGGAAACGTTAAAGCCTGGTTTTGAGGGTTTAGGTTTGACTAGGCTTGTGCACCATCCCAGACCCTGATAACCCAGCACATCCTCTTGCCCCATACCACTACTCATCTCGCACCATCCTCATCAGTTCTCCATGGCCTATTGTAGCAGATCTTTTGAGCCTCCACCCAAATTGCTGTGGGGCACATCACAGAGTGTAGAAGGGTGTAGCCAAACCCCTTTTCCACACCTTCCAACGGCAGCCACTCCCTCTCTGCTTCAGGAGGAGAGTCGTCAAGACATACTGGCTCTCACCTTCAGGAGCTCCTACCTTCCAGGTCAGGATGTCCACGGGTATGAAGA…	CP110427.1	Puccinia triticina	91.205	1933	0
TGAGTTGCTTAGTGACACTGGTGGCAAAGCGATGCTGATCCTTGGTGAACCTAGTACAAGGGTCCCCGGAAGCAAAGCCCATGGTCTCTGTTGTTGATGGAGTCGGGTAAGGAGCGGCGGATGAAGCGACGGTGCAGGGGGATACGAGTTGATGGCAGTCTGTGGTGCATCGGAGACAGGCTTCAAGAGCGAGGAGCTGATTGGGGGATTGACAGATGAATCACTGTCTGAGCGGGGTCGCTTGGGCGCACTTTGGCCATTAGGCTCGGTTCTGGATCCGTTTGATGATTAGGCGAGTCTTCTGCTCGTCGGGCGGTGCTAGTGCTGTTGTCATACATCGAAGGAGAAGGTTGTCGTTTGAAAGACGCAGTTAGGGGGGCAGTGGAGAGGGGGAAGCGA…	CP110444.1	Puccinia triticina	94.853	1496	0
GAGTCGCATTTCTATGACCGGTCTAGACCAGTCATCCAGGGTAATAACACCTCTTCCATCACCGGTGTGTACCAGTCATTGAGGCAGGTGCTACTCTCAATCACCGGTCGGTCTGACCGGTCATCAAGAGGAGATGTTACTCCCCTCGATGACCGGCACAGACCGGTCATTGAGAGATGTGACTACCTCAATCACCGGTCATCACCGGTCATTGAGTGTTATTTGTCAGAATATCTGTCTCTCTGCCGTCAGAATTTTCCCTCACCATCCCCAGTCCCCAGTAAATTTTCCAGTGCCCAGTCCCCAGTAAAGTATTCTGTCTTCAGTCCCCAGTACCCAGTCCCCAAGGGATGATTCAGCTCCCAGTACCCAGTCCCCAGTAAATTATCCAGTCCCCAG…	CP110427.1	Puccinia triticina	93.514	3423	0
TTTTTGATTAGGCTCACCACACTGTTGACCATTACTTCCAAGTCAGTTTACCACTCCGCTCTTTCCTTTCCTCATCTTGACACCCATCTTCAACCCGCTGAATCTGTTTTTGTATTATCAAGTCTTCCGCAGGATCTTTTGTTGAGGTCATCAGTCTAGGCGGCTGGGTATTTATAGGTTATTATCCTTTTCTTTCTTATCATCCTGTTGACCATGTTTTTTATCTAATCACACCTCATTTTTATTAGCCTGTTCCTAGTGTGTGGTTGTGGTTTCTATCAGACTTTGTTCTCATCTCACATTTTCTGTTCCTGTTTCATTTAGGTAAAAACCATTTCTATTGTTCTCATTTTATTTATTTTTCTTGTCATTTATTTACTGAAATCTGTTTCATTTAGC…	CP110444.1	Puccinia triticina	94.977	8860	0
ACTAGAGAAAGGCCGGGAGTTGCGGCTGGCCAAGTGCGGCCATACAACCTCTTCTCGCCTTGAAAAACTGTCGGCGTTATCGATTGTCGAGCATTGCTTCTCGACCGTTCATTGGCGATGCGGAGACCTCCGTCGTCAACCCACTGCGGTGTCCGGGTGGGATGCTGCGGGCGCGTTTACCAACGTTTTATTGGAGTTACTGGCCAGTCTCTCGTCCCTCTCGAAACTACGCTTAGCTAAGATAGGAAGGAACAAGTTACGACAATAGAAAACTGTTTTAGTCAGATGACGAGGATGGGAATGAAGCGATTTCCTGGCATTTCTCTTCCGTTTCTTTTTCCCTTCTTTGGTTGCCGAGCCGGCTGTCAAACCAATCTGATTTCCCTTCTCCAGCTTCCG…	CP110427.1	Puccinia triticina	91.723	2223	0
AGTGGCAATGATGACCTACCCAAGCAAATCAAAACCAACCAGACACTGCTATGATTGCTAAACAATCATTCGTTAGACCCCATTCCATCCGGATGCAGTACACATCACCCACGAGATCGAATTGCCAAACGATCAGCTGACACAGCAAGCAACAATGGGTTTGCCAATACTGGTCAGCAAGTATGCTCCTTCTGCATCATTATTTTGTATTTTTCCAATCCTATTGTCCACCCCCTTCTCTCGTCATTGGATTCCATTGGTCCAGGGGGCAAGCATACTTTGCACCCGGCCATCCCTCCCCTCTTTGATTCTATCATCCATTCCCCTTTCTTTTAGTTGTAGCAGTGCTGGGGGAAAGCATAATTTGCACCCGCACTCATCTACAACTCCACAACACTC…	CP110444.1	Puccinia triticina	98.294	1055	0
AAAATGGTCTTACCTATTAAAGTGCGATGGTGTCCAAAGTCAGATCCGAACACCACTTTCCACCAGTTCAAACCTCAAGACCCATTGTGATGGCTTGATAAATGCGTCCAGAACTCGCAAGGGTTGTGGTCGAGCGGAAGGCAATAGCTGATGGCGCCAAACTACCGCCAAGTGCTGAGGAATCCGTTGCCCAAACTAAAAAGGAAAAAGAATCCGGTACTCTGACGGCTTACATTCAGAAAGGACGATTTGACATCAAGACCTTGAATAAAATCGTCTTGTTATGTGGATGATGCGTAGTCACTCCCTGGACTTGCATCAATGATTTTTTCCTCGGAGTAGCGTTTGATTACAGCAATGCAACTGCTGAGCTCTATTCTCGGACTTGGGCTGCTGTCT…	CP110427.1	Puccinia triticina	93.867	1174	0
ATTCCCTGCAACATGAGACGTTGCAGCCACAGAGGGTCAGCTACATTGAATATACTGGCAAATTCACACCATTGAGAATGATGAACAATGGCTATCACTACATGCATATATGGCTGGTGGAAAAGCTCTATGGTTATATGTTTTTGCGAAAAGCCAATTTTTCCCTACTGCAAAGGAATAAATTTTTATTTAACTACCATGGTGGTTGTTGAACATTGAGAATGGTTGAACAGCATTCTCAATCCCAATTAAGTAACATCATTAAACCCAACAAAATTAATTTAAAGTAACATGATGAGATTCACATGATAATCCAAGTACTAGATACTCAAGATGTCCATAACCGGGGACACGGCTAACCATGATTAGTTTATACACTCTGCAGAGGTTCGCGCATTT…	PP465890.1	Triticum urartu	86.124	6104	0
AGATAGTATCAAGAGGATCTAGAAAGCTCAAGGTCAAGGCAATCTGGCCTCGCATAACTTCGTCAGAATGGCGGAGCGGACATGATCAACGGAGGTAGCTTGATCTATTATCGGGTGTAGTGATCATCTTGTCACTCTTGATGAGAGCTTCGCGGATCTGATCTTGAGAACTAAGGGAAAACAATTGATAGAATCGAGTTCTTCAATGGAGTCGACATGCTCGTTCCGCACCAGATAGGCCTGAATTTGGTAACCGAGGATTTCTTGAAGACTTGGAGTCCGAATCCGACGAAACCCCGCCCTTCGCGGTCCACAATTGAGTGAGGGCCTCCAGATCCGGCAAACCAAATGCGCCGTGTCAACCTGACCCCAATACGCGAGCATTGCAGCTTTGAGAGA…	CP110444.1	Puccinia triticina	93.741	1470	0
GACGGGCGCGCAGGTTCTTTTCTCCTATGTAGTGTGGTGGCCTCTCTTTATTTTCTTTCCTTACTTCTATGTTTCTTTCCTTTCTACATTTGTCTGTTGTTTTGTTTCTATCTGCGCGTGTTGGATGGTTTGGTTAGATGGTGGGTTGGTTTTGTCTGAGTTTAGTTGTTTTTTGTTTTGGTTTTGTTCTTTTTGTCTGTCTCCTCTCTCTGTGTTTGTTGCGCGTGGGTGTATGATGAAGGTGCCGCTGCGTGCTGCGCCGGAGTCTAAGTTCTGTGCCGAACTTTGACGATGGATGGCGTGAGAGAGTTCTGAACCATGTTTCCATCAAATTTTATTGATCCTGGTTATTCATTGCTGTCTGGAGCTTCTTTTGAGCTTTATCTGTCCCGCCGATCT…	CP110444.1	Puccinia triticina	95.061	1964	0
TAAATTATCAAAGGATTACTGGAATGTTGTCGATAATATCATCATGAACGAATCGATCATTTTCTTTCCAAGTCAAACTCTTCAAAACTTCAAGAGCTTGTTTATATGAAAGAAACTCAAGTTGTTGCCTCTACTTCTAAATCTGAGTCCACTTTAAAAATCAAAGGACACCGCTTCTGCTTACAAATCCAAAGCCGAAAAATCTAAAAGACCGAAACCGGCTGATCCATGCTCAGCGGGGGAAACACAATCCCTTACACTACAAACATTTATTATTTTGCCCAAAAAAAAAAAAAAAAAAAGTCAACATGAAAAAAATAAAACCAAAATTTCACTCAGGGGAACAAACTGAGCATGCTAAGCCAAAAAAAATAAAATGTCCCAAACTGAGCAAAAAAC…	CP110427.1	Puccinia triticina	94.851	4273	0
CCACCATTTGCCATCCCAGCGGACAACTCAAGACCTATTTTGTGTGGTAGTGGCTGCGGACTCCGCAAAACCTAAAGCAAAAGTAACGGCAGCATTCAGAACCATAATGAGCAGTGTTTTCAATCAACAGTGAAAGACCTCAGCAAGAATCCGATGGACCTCTCAATGCACAAAATCGACTGGGAACCTCCAAGGCTTGGATCAGCTAACTTTGAAAAGGTAAAATTTGAATCCAATGTTGCGACAACTAGAGCAGAAGCGCTTCGTGGACAACGAAAACCTCCGGCACAAGCGGATGATTCGGCAATGGACGTGGATCAGGAAGTCGGACCAGAAGAAGTTATTCAAGTTCCAGCAAACTAGGAAGACTCCCGGCCAAATCTTGGAACCTACAGGTAA…	CP110444.1	Puccinia triticina	95.992	1921	0
TACCAAAAAATCACAAGCTTTTCAATGGTCTGGGAGGCGTGACCAGAATCAGAGCGCTTGTGGGTGATTTGGGGGTTGTAATGCCCTCCCCAGCCAAATGGCTGGTTGCGCTGGCGCAGAGATTTGGGACATTATATTCAAGTCCCTCCTTCGGAGGCGCTTCGTGCCTCCTTGGAAGGAAGGGACTTGTGTGGGTCCAGCCACCCGTCATCATCTTACAGTCCCCGTCCGCCTCACACCGGCCTCCGCCTCACACCCCTCACACACACCGACACCGGCCTCCGCCTCACACCCCTCACACACACCGGCCTCCACCTCACACCCCCTCACACACACCGGCCTCCACCTCACACCCCTCACACCAGCCTCATCCAATCCAAAGTCCCCCGGGCAGCATGA…	CP110427.1	Puccinia triticina	95.17	1739	0
ATCACGACGGAAGCGTTCAAGAGAACGGGGTTGATGGAGTCGTACTCGTCATGATCCAAATCACCGATGACCGAGCGCCGAACGGACGACACCTCCGCGTTCAACACACGTACGGTTGGGAAGACGTCTCCTCCTTCTTGATACAGCAAGGGGAAGGAGAGGTTGATGGAGATCCAGCAGCACGATGGCATGATGGTGGAAGCAGCGGTGATCTCGGCAAGGCTTCGCCAAGCTCCAACGAGAGAGAGAGAGAGGTATTACGAGGGGAGAGGAAGGGCCAAGGACGTGGCGGATGCTCTCCCTCTCCCCTGATGATATAGGGCCCCTAGGGGGGGCACCGGCCCTAGAGATTGGATCTCAAGAGGGGCGGCGGCCAAGGAGGGTGGCTTGCCCCCCAAG…	CP110444.1	Puccinia triticina	93.578	4578	0
ATTCTGCCTCCAACTTCGAGGTCTGCAACATTGTGTTCTGAGAGGTATGAACGGAAGCGGGCAAGGATAACACTACTAGCGGATGCCTCGTTTGATGGAGTCTTGAAAGTCAAAAGTTGTGATTGTGGTGGCGCAGGAGGAAGGTCACTCTTGGCAGCTTCAACCCCAAGGAGCAACCCTGGTGAAGTCGTGGATGGACCGAGCGAATGCGGAATTGCCAGTTGGAATGCCGCTTGTCTGCGCAGTTTTGAACGGAGGTTAAGGATGTCGTTGGCATCGAGCCATTCTGGAGGCCAGTGGGTTGGCCATATCGGAGGGTGTGACAAGTAGGAGTAATATTTACTGTAATGGGGAACTCGGCGGGGGCAGCAGAAGACAAATACTGTTGCGGTGGGCAAT…	CP110444.1	Puccinia triticina	95.587	1269	0
CAGTGCTGATGTGCACCCTCACCCAAAATTTTGAGCAAAAAGCTTCAAAACTGATGAAGGAATCTGTTTTTGAAGGTCAAAGGAATCCTGAAGGAATTACATTGCTCTGAAGATCCATTTTTGGATTTTCTGATAATATGCACAATTGAACTACATGTGTAGGATCTACCGGTGTAAGTCCCTCCTGACAAGAGGCTTTTCTCGCAGGAGTTCAGCCTACCCCCAGGAGCCAAAGTCTCGAGGGACTTTAAAGCATGTCCACCGGGGAGGTAAAAGCGGGTTGCTAAAACCTCGGGATGGCAACTCAATTTTGGTATAGCAACCCACGCGGCTCTGGCACACACCCGTGGTTGCTATAATCCAGAAGCACTCCAAGATGACCAAGTCATCAAATGGAGT…	CP110428.1	Puccinia triticina	95.045	1332	0
GCCTGGAGAAATATGTAAAATACTACACTCTCATTACAAGCGATCAATGAATAGAAAGGACTACTAGTTAGCTGATTTTGCACCAAAACCCATCACCTATTGACTTTTTGGAGCACGTTGCATGTGGACTATTTTGCTTCAACACCACTAGTACATTCCCCACCTCCAAGTCAAGTATAACCAATTTCATTATAACCAAGACATTATTCCAAAGAATGACTGGGAAATGGGATTAGACATTGATTCTTTGATAGTTAAGCTTTCCCTTATCCATTAATGTGATGCTGTTTCTTGACCCCTGCTTGAAATGAAGATTAAACTTGGCAGCAATTAATCTGTGACAGTGTGGAAGGGCTCAGTCTTGATGGCAGAAATTTTTGGATATATGAAAGGGCAAAA…	CP110428.1	Puccinia triticina	96.583	761	0
GAACGTATCGCTGGGTCTTTGCAGACAAGCCTGGCTCAGCCATCGCGCAGGGTCGCAAGGCAGAAACCAGTTTATTCTCATCGCGGGAGACGGTGCACCGGATGCTAGTTTAGTCTCGTTGCGGAGACGTTCTTGCTGAGGGGATAGATGATTCTTGTTGCGCAGCGCAAATCCCAGATCTTGAGATTAAACGTCTTGAGGACTACGAGAGTTCTGAGGGGATGACTGACACCGGTGAAAAGACCTGATTGGGAAGAGCCTCCATAGTAGGATGAAAGACTACCTGAAGGTTGAGAGGGAAGGCAAATCCGAGGGGATGCTCAGGTGTGTGGCCCGAGGTGATGTTTTTGAAGACGTGGAGCATCTACCCGGTGGTGCATACAGGGAAGGGGACTATGT…	CP110428.1	Puccinia triticina	92.806	3614	0
CCCCAACTTATTTTCTACCAGGCAATGCACCAAGAGAAGGGTGATCCCAAAAGAGTTGAAGAATGTGAGTCCAAGAGTCCAAAGTCCAAAGTCCAGTGTTCCTCCTCCAAAGGTGAAACCCAAAGTCCTGAGTAGTAGTCCAAATCCAGAGTCCAGTGTCCAAAGCCAAATAGAATCCAAGTATAATCCAAGTCCAGTATGTCTGAGTTCAAGGTATCCAAGTCCAATCCAAGTCCAATAGTCCTATGTATCCAGAGTATCCATAGTCCATCCAATCCAAAGAGTCCAGTATCCAAAGAATGTCCAATTATCAATGAGAGGTGAATATTTAAGAAGATCTAACTCTGCTGAAGGCAATATCCTTGAGACAGACACATATTAGACTAAATTCCATTCTGA…	CP110428.1	Puccinia triticina	95.665	1384	0
ATGTAGCTGTACTGGCTCCATTACATATACTCACTACCAGGCCCAACAACAACAACAACATTCACATCGATCGCACGGCACAGACGGGCCACGGACCGCGACCTTCCAGGACCCGCCGCCGGGCTCGGCGCGTCTACGGGGCTCGATCAGCGGCGGCGGCGGCGGGGGGATGGGCTCCTCGTCGTCGTCGTCGGGGGGAGGAGGATCCCGTACGAAGCAGATGTTCCTGCAACTGTTCGAGAGCTTCTACGACTCGCTCTCGGACTCGAAAGTGTTCAAGACAACGACCTCGAGGAGCAGATCCGGCGCTCGGCCCAGCTGCTCAACTCGCTCCAACAGTCGGCCGGCGTGTTCGAGGCGATCCTCGACGACCGGCTCGCCGCCGTCCAAGCCCAGTCC…	CP110428.1	Puccinia triticina	97.394	1458	0
GATTTCGGCTCACTCCGACGCGTAATATGCCTGTATCACGGATGATGACCACTTACACGCGCCGTGGGCCCGGGCAAAGTTATCTGAAGTCCTTGTTTGGCCGAGCGGATAAACAGTCTCATAGAGCACAAAGACTTGAACTTGGAAATTAATCCCTTGAAGGTGATATCAGACGAGTCTTTCCTTCCGCTATTCGGTACATTTATGAATCGATAGATTATGATTTTTTTTTGCTTAGGTTTACGACCAAATGATCCAGCAGATCGAAGACGAGACTGGCTCATTACCTAGATCTTCCCCGTGGGATTTCTGCTAAAGTGGCAGCGGCGAACATAGATGTACAAACATTATTGCACCTCGACTGGCGATGTTGATGGAAATTGCCAACAGTTTTCTGAT…	CP110445.1	Puccinia triticina	94.08	16081	0
TTGTGCGTGTGCACATCTTAATAACATGAGTATATACAAATATATGGATGAGTAACGGGCATTATTAGCTTCTTTAGCTGGTATGTATCGTCGTCACCCCTTCGACCCCTTCTTCCTTCTACTCGGACTCTTCCTCGGACGGCCCGTCAGATGAACAGCACAATCCGTTTGCAATCGACAAGAAGAACAGCAACTCTCATCGTGCTCGCTTTGAAGAAATAGAAACCATTCTCGAACGGGCACAGGCACATAGTTATTTGCGGAGAATGCGGAGGGCCCAACTGCTGGTGATGTCGAGCTCTTCACGAACGAAGCCTTCCACGACAAACACCTCACTAGGATTTTCGCCCCTCTTCACCAGGAAGAGCAAGGGTGTACGCTGTGGCGTCTTGAAGGCGA…	CP110445.1	Puccinia triticina	95.41	6688	0
TATGTTTCTTGGTTCAGAGTACGTATTGCTGTACAAACAGAAACGATTCCAATTAAAAGTGAACCGGGGAAATGAGTGCTTGGCTAAATTCACTTGGTTCCATTTCACATGCGTCAAACTGCCGAGCTGGCGGTAAAGGGAGAACTTTTGAAAGAAACTGGTATTAGGCAACTTTTGAGCTGGGCGATCACTTTTGCTGATGTTGGTTTATTTCCTGTCCATTCCGGCAGTCTGGTAGATCACTCTTTCAATCGCTTACTAAATGCGTTCCTTACGGCGCTGCCCTTCCAGGTGTCCCAAGATTGGAGCTCTTCTGAAGTTACCAAGCTGGGAAGTCCATGCGGCTTAGCATTAGGCGCCAGGCCCATCATGGCCTGAGTGAAGTTCCGAAGACTACGC…	CP110445.1	Puccinia triticina	90.844	1398	0
AAGACAATATGTACCATGTGCCTAATTCCCTTCTTACTACGGTGGACCTGTGTAACAAATACTGATTATAATTCTGACTTTTATTAGTTTTATATGGCTGACTTATCTTTTATTTAGATCAATTAACTTAAAACGCACTAAAGTAACTACTACTAATTGAGATGATCTAATGCAACCTGTGTGGCAATGATTGCATCATTGCCACACAGGTTGCATTAGATCATCTCAATTAAGAGTAGTTCTAATACAATAATTAAGTAAATATAAATAAAAGATAAGTCAGCCATAAAACTAATAAAAGTCAGATTATAATACATATTTGTTACACAGGTCCACGTAGTGAGGGAATAGGTGCATGGTACATATTGTCTTTTTCAAAAACCTTGGTCACTTTTTTCA…	CP110445.1	Puccinia triticina	95.318	1303	0
ATGTCGTATCGCTGTTTGTGCGTGTCACGTCTGATATGACGTGAGTATATACAAATATATCAATGTGGGTTGACGGGCATCTGAAGCTTTTCTTTAGCTGGTCGTCTTCGCTCGTCGTCACCCCCTTCGACCCTTTCTTCCTTCTACTCGGACTCTTCCTCGGACAGGCCCAGTCAGATGAACAGCACAATCCGTTTGGAATTCACAAGAAGAACGGCGACCATCGTGCTCGCTTTGAAGAAATAGAAACCATTCTAGCGGCACAGGCACATCGGTCGTTTGCGGAGAGTGCGGAGGGCCCGACTGCTGGTGATGTCAAGTCTTTCACCAACGAAGCCTTCCACGATAAAGCACCTCACTAGGATTTTCGCCCCTCTTCACCAGGAAGAGCAAGGGGTG…	CP110445.1	Puccinia triticina	94.363	6741	0
TAGCCTACTCCAAATTTTGTTGGAGTGAACAAAAATCACACCTCAAAAAAGCCTGTTTTTTGGAGTGTACCCATGATGCACTCCAAAAATTTTGGAGCTGAACCCAATTCCAATCCAAAAATATTTTTTCAAGGGAGATTTTTTCATATTTTTTTTTGGAGTTCAACAGAATGTCTACCGCAAATTTATTGGAGTGGATTAAGGCTTCTCAAATTTAAAAAAAATGCAATTTGGAATCTGTAATTGAAACTTGTAACTTTGAACAATGTATATTCCAAGTTCTTGGGATGCAGTACCAGGAACTTTATGGCAGTAGTATGCAGGTTACATGAATCAACCTAATTGAATCCCCCCTAATTTATTTCTGGTGAAGGTTTTAGTCATTGTAGAAACTGAAAG…	CP110445.1	Puccinia triticina	94.986	1456	0
AATAAAAGCACGTAAAACTTCGTTCATTAGTCATGAAAGTACTAGGTGCATTAGTTAACCCAAAAGGCATGACTAACCACTCATATAAACCAAACTTAGTTTTGATGCCTATTCCATTTCATCTACTGTTCATACGAATTTGATGGTATCCACTACGCAAATCAACTTTGGAAAATATTGCAGAGCCACTAAATTCATCAAGCATATAGTATTAGCCTAGGAATAGGATGACGATAACGATGGTTGATGTGTTGTTGATGCCTACTACAATCAACACACATACGCGATGTACCATCCTTTTTAGGCACAAGTATAATAGGAAAAGCAAAAGGACTAAGAGATTCGCGTATATAACCTTTGTCTGACCTGCTGTACTTGACGCATAATCTCCTTCGTCTC…	CP110428.1	Puccinia triticina	95.536	2061	0
AAAGGGTCAACTTTTAGATTTCCTACAGCTTTGTGTAGAATTTAAAGGTGTGTAAAAGAAGCCCTAGTCTCGTGCCACAATCACTTCCACACATTTTCTCTCGCCCTCCAGCACCACATGTCCTGCTAAAACAAAACTGACACAATTTTTTATACCATGCGGATCTCCAGGACCTGGTCGAGGTAGGCCTCGAGATTAATTCCACACCTCCAGTACTCTAATCAGACACATCATGGGGTGTCAGGAACACTACTGATTCTCATGTTTTCGCGCGCGATGTCTCTCGTCTATATAGAATTAGAAACCAAAAAAGAACCAGAGAATGCAGATCTGGAGACGCGTGGGTACTCATCCATTCCTTCAAATCTGCACATGTATTAAGTGAGATTAGGTAACGAT…	CP110445.1	Puccinia triticina	87.596	1814	0
GGAGTGTGCCAGCATACCTGGTGTTACATGTTCACAAGCTTCATACATATTTTATCCGTTGTAAGTCTTAGCATATCCAACGGTCCGGGGGGCAGTTGGCCTGTGTTCCCCAGCCCGCAAGCACATGTCACAGCAGTGGCGGCTTAGCTCCAATTATGGACTGGCAGTTGAACCCGCAATCCGACAGGCAGATCACTCCTCCAGCACCACCCACCACCCTTGTTCTGGTCATCAATAGGAGTATAACATACCATTGGGATGCATGTACATCAATGGCAAGAACGTTCTAGTAGCCGGGACGCATGTATCTCGATGACCAGAACGTATGGTGATGTGCGTTGATGACCGGAGCAAACAAAGGAAATGTCTGCTGATGGCCCAAGCTGACCGTCATTGAGA…	CP110422.1	Puccinia triticina	84.795	855	0
AATCAATTAAGTGTAACAAAGCTTATGAATTGAGAAACCTGCCTGTCACAATTCCGCGGAACGGAAGCGCTCCTGCGCACCCGCGCCCTGATTAGTTTAATCCTGCGCCTTGACCCTGACGAGTGCGAGTAGGTGATTGGATGAGGATGGTGACCTGCAGCCTCAAATTTCTTGATGACAAGCGAAGCGCTCGCGAAAATCTTGCGGAGATCATCAAGCGCATGTGGACATGACACTCCGCAAGAGACTGGCATCCATCCATTTGACTCATGTCCTCATCCAATTTCTTATCATCTTTGAAAGGCACAACGTTGCTTCTACCAAGTGGTTCAAAAAATCTATTGAACGGGGAAGAGGAAGTTCAAATCATATTCAACTACCTCGCGCGCAGGTTTCCAG…	CP110428.1	Puccinia triticina	96.753	7175	0
AACATGAAAGGTTCATGGAAAAATGATGAAAGGGGTATGTACCCATTGTGAAAGGGATACATGCACATGAAAGGGATATACACACCTGAAAAGGGGTATGTGCACATAAAGGGCTATGTACACATTTTTAAAGGGGTGAATGCATACAAAAGGGATATGTGCACATGAAAAGGGGTACTGCACACTAAAGGGGAATTTCAAATGAAAGGGGTATTTGCACAGGTATCAACTCCTGTACTGAGGTTTTTGTACCTTACACTCACTCTTGCATAAATTAGGCAATGTGTATGGAATTAACCAGTGCTTGATTCTTGCATGAGGGACAGCTTGCCTTGAGCTCTTGCATCTCAACTGCAAGCAGTTTCTAGAGTTTTTCTTGCAGTGTGATTCTGCGCACCA…	CP110428.1	Puccinia triticina	97.368	1102	0
CTATGCATTGCTTCTGCAAGGAAAGGAGCAAAAGAGAAAAGGGAACTCAACTCCCCTCAGCCTGTACCGGGGTGACTTGAGGGCTACAGGGGTAGCACCTGGGTCAGCCCAAAGTGGGGAATCATCCACAAGACAGAAATTAGCCTGAGTACTACTCAGGCTACTCATAACTGCACACAGCACTAGGAATGCCCAGCACAGTGGAATGGATCCAGGTTTCACATATCATTTCACTTGTATGTAGTATACCTGAGCTCAGCGGGTGTGGAAGGATCTTCTCCTCATCCTTCCACACCCATTGCTCACTCGACCCGCCTCGTGCCCGCTGGTCTTAGGTATAGTAGCTCTTTCTCTTTCTCTTGTTTTCTTTCTCGACTTGCCCCCTGCTTCTCTCTAGTC…	CP110445.1	Puccinia triticina	96.148	1350	0
CGTAACATTACAGGCCTCTTTTTTTGAGGCCATTACCAAGTAATTATATTATGAGCAATAAAAGGCCAAATTGGCCTGTTTTGGCCTTTTGTTGCTTGTTATCTTGCCCAATATCTGTCGCTACGCGCTCAGATATAGTAACGCCAATGACAAAAAAAAACTCTTGGTGCAATATTGATATTGCACTGCCAGTACTGGTAACAATAACAATAATGACCAAAAAACGTTACGTTACTGTTACGTTACGCGTTACTGTAGCAATAACTACCCACTGTTGTCGTGGGTGAAGTCCTTCTTGACTGCTCCCAAAGCCCCGCCCTTCTGTCAGCTATATTTGCCTCTTGGGAAATGGGCTTACTCCAGCTTGGTCTACCATATTCAGCACATAATTCTTGCTTT…	CP110445.1	Puccinia triticina	95.208	9829	0
TATGCAGCCTATTGGTTCAGTTACATATACTAGAGAATAGTGAATATCAATATTCATTATGAACTCTTTGGTGAGTGTACTAGGGTACTACTCACCAGGGGTATTCCTCTTATGAGGGTAAGTCAAATTCCAACACCTAGCATGTATCAGAAAAAGAAAAGATTAAAAAGGCAATAAAAGATTTAAAAAAAAAAAAAACAATGTATAAAAACGGACTTACTTCGCGCACTGCAAAAAACTCTTTGCGCACTGCGAAAAACTCTTCGCGCACTGTGGGGGTCGTTGTTTTGACGTCCAGCCCCCAGTGCGCGCTCTGTGACGGCTCTTCCGCACTGCAAATTAAAATGGGTGATTTTTGCATTTTTTTTCGCTGCCAGCCAGCAGGGGGGATTTTTCTTG…	CP110428.1	Puccinia triticina	95.954	1038	0
ATGTGGCTAGCATCGTTGGTCTTGCTGGCAGTCACTCCGACATCTTTCCCTTCCAGCGCTGCCGGCCTGCACCTGACAGAGCTCCATATTTGGTCCCCAAGCCGAGATGGGGCAAGGGCAGCCTCAAGGGTGCCCAGTCTTGGCTGTGGTTTTGTGGCACCTGGGGGTATAGTTTTCTCTCTCTTACCTTACTCCAATCATCCAGTCAGCTTGCAAGAATCCCAGCTGAACCAATTTATTTGCCCTTCCTCCCGTCTCTGCAATCTTGAGGATCCAATCAGTTTATCATTTGCCTTGTTCCAAGGCACCCTAGTCCCCGTTTTACTTTGAAGAAGGGGTCAAGAGTTTGAGGACCCGGACATTCCTGCGCAGAAGTAAGTCCCCTCCAAATCAGTTGCA…	CP110445.1	Puccinia triticina	94.984	2153	0
TGGACCAAAGACGTCAAGCCCTCGCCATCAGTCAAACCCCACCCTTCATTATACCGTGGGTTAAATTCTAGCTGACATGGCCAATCATGAACGTATGAGTGAAAAACTGCTGTTGCAAAGGACATTCGCGGTAGTTGATTGCTGAGGAGACCACGGGCTTTAAAAAATTTCTCAAGTGTGCACCCAATATTGTATAGTACACCGAGTTGAACGTTTGGATTGATATCATCGAAAAGCTGTTTTAATATAGACATCGGTAGACCACGCCCTTCCCCTGTTTGTGAACATCCGGACAATAAGATGACTGAGTCGTGACGGCAGCAGCATCCAAAAGCCCAGTATCGTCACAACCTTTCCAAGAGCTCGCGTTTCGACGGTCATCGGCGGCTTTGTGCTTGT…	CP110445.1	Puccinia triticina	97.421	1047	0
TTAATGTAGAAGGAAAAATCAAACATACAAAAAATCTGCCCAAACAATCACGTCCAGGAGCTTCTTTGCTTTGCCCCTATTTCTTTCTCCTCTCCGCTACACCTCCTTAAAGGTCGATGATGGGGACATCATCTAATTTGGGGTGGATGTGGGTGAGCCTAATCAAAGCCTATTACATCACTCAGACACTCACCAGGAAAGGACTGCTAAACGCCCTCTAGAAATCACTCTGGTAACTGTAATGCATTACAGCACATTTATAATAGCCTATAATTATCTCTACAAGGCGCCTCAACTTCTCAGTATTCACTTTCATGGCATGGCCCTCCACAATGGGTAATAAAATATGTATAAATCAGGTCAAAAGTGGAGAAAGTCCACCATCAAACAGAGCCAACT…	CP110428.1	Puccinia triticina	95.64	10458	0
GCGCATCGCGCGCGTGCGCGCGTAGCGCGCGGAGGATGTGATGAAATGTATGTGACATGTCACCCTGAGTCCAAGTTCAGCTCAAACTTGGATGATGGGTGGCTATGGCATTCTGATCCCCGACAAGATTGGACTATCACAGAGCTTATAGATCATATCTTCAGAGTTTCAACTTACGGGCTCCGTCCGCCGATCGTCCTTTCATCCAGGATTCCAGATCCCCGTTCCTTCCCCGAGATCACTTCTCATCCCATCAACCACAAACAACCGCCGCCGAGGATCCAAAACCCCGGCGAACCTCTCAAAACCACCCAACCAAGAGCTATCCCAACACCCCCCCCCATTTCAGCGCTGGAATCCTCACTGGACTACCCACCTCGAGGGAGCCTACAACCCATC…	CP110448.1	Puccinia triticina	93.053	6866	0
CCGCCACTTTGCCTGGCCAGGCGGCCGAGATCTCATTTAGCAACACCTTAAGTATTTTTTTAGCCCAGGCTGGTCCTATATATTTTTTTTTATCCTCACCTTCAGCTCCCGGTCTCATATCATTCACTGTCACACTGTCGTCACCCAGGCTGTTGCAATTGGTGAGCTCAGCTCCCATCTCCTCAGCTATTCACCAATCTCCCCCTTGGCCTTGAGTTGCAAGTTTTTGCTGGAACAGGCTTCATCAAACTTGGCACTTACATGTGTCTTTGCGACACTTTCACTGTAGGCTTGTCCAAATGGAATTTTCATTGTTGAATTCTTACAGTCATCAGCACCGACTTCCTGGCCCCATTTGCGGGATCTTTATGAAGGAACTCAATAACAGCCATCCCGTCA…	CP110448.1	Puccinia triticina	96.612	1151	0
CTTTTCTTTATCCTATTATCCTCTCATCTTACGGATTACTCATTATTGAACTTTCACTTACTAAATTACTAGAGTTATTAGGAGATATATTTGTGACCTTATCTTTACTTTCAGAGTTACTTGCCAATTCTGTGCTTACGGAGTGCGGAGCTTTATTCACTTGCGGATTATTACGCTATAGATCAGGCTCAGAGAGGAGTGCTGAAGGCTAGCGGATAGTAGCAGTGCGGAGCCGAGTCAGCAACAATCACACAGACTGGACACTAATATTCTTGAAGAAGGCGGTCAGCGGACATTTCCACCAACAAACCAGCTTTCATTCTCACACTGGGGACATCTGGCAGGGAGGCGCCTGGCGGTACACCCGGGTGTCATCAGGTTTTTTCCCCCCAAAGCAGG…	CP110448.1	Puccinia triticina	96.425	1986	0
TCACCGGATCAGTATGTATGCCGCGACGCGCTGGGCCGGCCTCGACGGGCCGGAGCCGAGCTGCTGACCCCTGGAAAAAAACGAAGAGGGCGCGGGCGGCCGAGGCGGCCTCGCCGAATATGAAACCGCCACCAGTTCCTCGCCAGGACTTTCTGGATACCTGCACAACCACAAAGTCTCAGCTGGATTCTGATCATGCCTGGCCCTAACAATGCTAAGTGGGGGCAACGGCTCACACTACTGTGTCATCACCCTCACCGCCCCATCCACCCCACCAACTGCGGGATCCTCCTCTTCATCCTCTACTGCTCCTCCTCCTACCACCCCAACCACTAGATCATGCAAATACGTTCCTCTTGCTTTGATCCATGGGCGATCTGGAAGGGTCGTTCCTGAATC…	CP110448.1	Puccinia triticina	94.284	1942	0
AGAAAATTCTTAGGAGTACCTAGACCACCCTAAAAGGCTCTTTGGTGTTTTCATATGTTTTCCAAGAGTATGTTTCAGAGATTTTGTGAAATTTAGCATACCTTTTTCAACACCCCCCTATTAGGGGGCTTGTTGGGGTCCTGCATTGGTTTCTTAGTTTTCCCCATAGTGAATAAGAAAATAGCCAAGGGGGGGTTAGGGATCTGCAGCATTTTAACTTGAGAAGAAAGAAAATGAGAAAGACAAAAACAAAGAAAAGAGATCAAAAATACAAGAATAAATCACACCTATGCAGAGATTACTGGTCTAATTTACTCACCATGCTGCACAAAACAATGGGGATTTACTGATGTTGTGTTATGCAAGAGATTCTAACATGACTACCACATTTACCAGATA…	CP110448.1	Puccinia triticina	93.887	3337	0
ATGTTATGTTCTTGTCTCGTTCAGAGTTACATCTGTAGCACCGATTTCATGAAGCAGGCGGCCGAGGACTCAATCGACGAGATCGCCGCGAACCATTACAGCATCCCGAAGAGGCCAGTCAACCTGCGCAAAGCGATCTCGACGCACTAATCAGAGAGCTTCAATTTCGAGAAGCGGGAGCTGGACTTCGAATGCGAAGTCGTCATCACTGCGGGTGCGTGTGTTTATTCCATACATCTCCACGACGCTAGAGCCCCATGACTACCCTCTATTGGTGGGCATATATATCTAGGTGCCAACTTCGGCATTTATGCGTCTTTGCTAGCGTTCTGCTCGAAGGACGACAAAGTGATCCTCATCGAGCCCTTTTACGACCAATACTGAGTACCCGCTGGGCGA…	CP110448.1	Puccinia triticina	97.163	1868	0
GACAGCTCACCAGGAAGGACGTTAAGTGGATTTGGACGAGCAAATGCGATCAAGCTTTCAAGCAACTCAAGGATATAATTGGCAAGGGTATCGTTCTCAAAAGCATTGACTACTCAGCGGACGCAGGATTGATTAAACTGGCGGTTGACTCAAGCTTCATAGCGGCGGGTGCGGTGTTGATGCAACAGGAACTCGAAACTGGATTGGATCGACCTATACTTTACGAATCAATAGTATTTTCACCAGTGGAATCACGGTACTCTCAGCCTAAGTTGGAGTTGTGCGGAGTAGCTAGGGTTTTGAAGAGGCACAGATCTACCTTTGGGGCCAACACTCTGAACTCCAAGTGGACGCCGGGGTGCTCATTAATTAGGAATGATAAACTCTCCATCATTACCC…	CP110431.1	Puccinia triticina	94.975	1632	0
CCATTGCCTAAGGGCACCACCTTAGGGTACTGAGTAACAGTGCCTGGGAAACAAGTTTGTTTTTTTTAGCTGGTTGGGTGCCTGAACGCCTTGGGTGTGGTTCATAAGGTTCCTTGGAGGCTGTTGCTCCTAATGAAATTCCTGCTCTCACCCAAAATTCAGGCTGACTGCTGCCATTGTCTTGCTTATTCTGTTCCCGTAGACCAACTCCGTCCAATCAACTACACCCACCGACAGACACTGAAGCACTTCTACGGGAAGCAAATAAGGCAAGACGAATGGCAGCAGTGGCAGCAAAGTTAGCCAGATAAGCAGATTCATTAGGAGCAACAGCCTCCAAGGAACCTTCATCAAACCACACCCAACCAATTCCGGCGCCCAACCGCTCAAGACAAACTC…	CP110448.1	Puccinia triticina	96.796	874	0
TTTGGGAGAGGAGAAGTCAACCTCCGGTCCGAATGGATCTGGATTCGGGGCGCGGCCGAGGTCGAAGCCCGAGTCCCTCGTCGGAAGAGGGTGGCGACTGGAGAGGAGGAGAGGAGCCAGCGGGGAGGAGGAAGACGGCGAGGCGCGGCGACTAAGGAGCGGGGCGCCGCGGGCGGAGGACGGCGGCCGTGCGCACGGGTGGGTGCCGTTGTAGGAGGCGGGGCGACGAGGCGCCGGCGAGGCGCAGGAGGAGGGCGGCGGCGCCGGGCGGGCGAGCACGCGGGGCTCGGCCGCGGGGGAGACCGGGCCGCGGGGGCCAGCTACGGGCTCGCCGGGCCGCGGGCGCACGGGCGGCGGGGCGCCGACGCGTGGCGGGCGTGGTTGGCTGCGGAGCAACAC…	CP110448.1	Puccinia triticina	89.363	1194	0
CATTACATAGAAGATAAACAATAAAGGGGGTCAACTTGTTTAACACTCACGAATTTTACAGGCACTCCTAAATATAAAGAGTGGGCTTCATCATCGCTCAAGACGTCCTCGATAACATTCAAAAGTGAGGCAATAGTTGTAGGCATAGTTGATCCAACTAGTGTTAATAAAATTAGCTTCCGGCAAATTAAAGTGAATCTAGGATAAAGCTGACTCACGCGGAGCCGAGCAAAAGAGATCTAGCACCAACTTCAGACAGCCTTGAATTTGCGAGCCAATCTGTTTTTTGAGGGCATGATTGTGTCTCATGATGCTTTGAAGAGTTTTAATCAGTAGACAATACTGCCATAACAGTAAAAGCGACTCTTCATCTTCCCAGGAGGCTTCCTAGCGTAAATA…	CP110448.1	Puccinia triticina	96.57	1866	0
TCCGATCTCAGAGCTTTGAGAGGTTTGGAGTGTAACTCAAGACGCCAATGGTATCAATAGAGAAGAAGTGGCCTCAGATTTCTGGGAAAGGATTTTTATCTCACTATATCCAGGACCAATATCCCTGATGGTTAGAATGTATTTGCCCGCTCGAAAGGCCAATGAGATCCGCATTCCATACGATCCAGGGGCAGGAAGGTCCGTTGGGTGGATGCAAGGGTGTTCTTATGGACACTTTGGAAACCATACACGTGGGGCAATGAATCTGTCCTGGAGGCAGGACGGCAAACCCAGTCCAACTTTTAATTTAATCATCCTCCTGATGACCCGAAGAGAAACTTGACCAAGCTGGACATGGATCAGCAAGAGGCGCTTCTCATCCGCCGTCAGGGCAGGAGT…	CP110431.1	Puccinia triticina	94.997	1579	0
TTTGTTAACCTACTGGTACCATTACGTATTGCTAGTGCTTGAAGAGCCTCCGGATGTATGACTCCATATGTGTTGATCATCTATGGAGCGAGGAATCACTTGGCAGTCTTCATTAAGGGAAATAGTCTTAAGAAGATGTCCGAATCTCTCGAGCCTTTTCACTCCAAAGACTGTCGAAGAAGTTCCATCTTTCCTTAGAGGACGGTGGATGTGTAGACGATAGGGATCTCAGAAGTCGAGCAAATCCAAACAAATTATGCGCCAGGCTATCTCTAAGGGAAATGCTGCAAAGGGAAAATACTATTTCTTTCAAGAAACTCAGGGCACTATCAACTGTCAATCAACATGGGTGAACGCCTTCTCCGATCCTTCCAAGACTCGCCGAAACTGAGGAGAGTA…	CP110448.1	Puccinia triticina	94.269	4484	0
TTTTTGTGTATGGTTACTAAACTACGTCGGTCTTGCTCCTCCTTTGGATCCGGGTGCCGGGGACGTGGGGGGCACGGGGCTGTGCCTTGGTCCGTTGCATCGAAAACGCCCGGCCACAGAATGCACAGCTTTAGCCGGGCATGACTGAGCGAGAGATGTTTCTGGAGGAGTGACAGACAGAGAGAGAATTCAATGGGTGTCTTTCGACCTTAAGCAGGGACGGGTCGGAAGGAGGACGGACTTGGTGGGAGGCGCCCAGACGAATGCATCCTCTTTGATGACCTGGGCCCCTTTTGCAGAGGATAATCCTTGGCGATGAAGCCGCTCCCCCTTGTTTACTGGCGGGGAATCTGGTTCCAGGGTTCGATCTTTGACGGAGCACTGTGCATTTCCAAGAGC…	CP110431.1	Puccinia triticina	92.726	2241	0
CCAAGCCCCTTTATTCAACCAGAGAAAATGTTGAGATGTTTTAGAATAGGTCTGAATGTGTCACATCTGTTAGATCAGGATTTCTTCTTGGGTATACTGATCCCAAAGGTATGATTTTTCCAGAAACAACATTGTGATTTTGGATGAATTGATCCTCTGTCATAAGCAAATCTCCTCCTGTAACACCCTCTCCTGTGAGTAAATTAATCATTTCAGTAATTTTTCCACGGACAAGATTGATTGTTTGGGTCAGAGTAGGGACAATGAGAGTTTCAAGTTGAAATTGATTTTCTCCTGGTTTCCCCTTTTTCTCTGGACCTTTGAATTGATTACTTCTGTTTGGAATCAAGCCTGGGGATTTGAGGCTTGGTCTTGATGGATTGAGCTAGGGCCATGACC…	CP110448.1	Puccinia triticina	96.287	1212	0
CTCGACCAGCCACAGTGTGCTCAGACCAGATGCACCAGAGCAATACCATGAGTTTGACTGACCACCTGAAGGCTGGCTGCTGAGGCCCATTTGCCAAGCCACCACCTCCACCAGCATGATGCCCAGCTCAGCCATGCAAGGCTGATGAGTGGAGTCAGAACTACAAGGAGTGAGAAATGGGTTAGAACACTATGAGCCGCAAAGGGTGCATAAATGAGGCAGGGACATGTCAAATACAGAAGAAATGGGGTTAGTCCCCTATAAGCAGTGGAGATAAGAGGGATAGAAAGAGATTGTGTTTGGCTGGGGTGAGTATCCCATAATACTGGAAAGTTAGGCTGAGGGGGCTGAGAGGTCGAGATCACCGGCCCACCAGAATACAGTCCCAATCAGCTGGGT…	CP110431.1	Puccinia triticina	94.242	4116	0
TACCGGCGCAGACGGTCATTGAGAGGAGATGTTACTCCCCTCATGAAGGGCACAGACTGGACATCAAGAGGAGATGTTACTCCCCTCAATGACTGGCAGAGACCAGTCATCAAGAGGAGATGTGTGACTCCCCTCAACGACCAGCACAGACTGGTCATAGAGATGTGACTCACCTCAATTACCAGTGATGACCGGTATGGTGAGCAGAATCAACATGCACAGCGTGCAAACATGGTAAAATACCACCAATTTAAACATAAATAAGTATAATTTCATGTCATACCACAGTCTAAAAGATGTTACAAAGACTTTCCATAAATTTAAGTGCATAAATAGGTACAAATTCACTTTCAAATATGAGAAACATCTAGTGTATGTAATTTGTCCAAAATAGCCACT…	CP110431.1	Puccinia triticina	96.088	10047	0
GCGTGCTGAGTGTACTTATTGTCATTGAGTCTTCAACCAAGGAAAGCCTCAACTGCTATTCCACCACATCAAAGATGGCTGCCCAACTATTTCTGCTAGCAAAAGTGGCAACTTAATTGAGTAACAGCGCTAAGGTTGATGAGTCAACTCATCCGGAATAATTTGATCAAGACAATGGCCAAAAGATTCTGTCACAATTGGCCCTACTAGCAAAAAATCTAGCCAATCGAGTCAAACAGTACTTCCAGCCCTTTTCAAGTGAAAAGACTATGAAAACTCACAAGCTACTTGTTAAATCTCTCATTAGCTCCAAGCTACCATTTTTGTACCTTGAGAACCCCTACTTCCAAGAATATCAGTTAGAACTAGCGTGATCTGTTTACAGGATGCCTTGTCAAG…	CP110448.1	Puccinia triticina	97.487	796	0
CCATCAAGTTGAGACATACTCCAATCAATCAGCCTGGGTACTGGATGATTGGAGAGCTTCACTTGATGGCCACGTACATCACTAGCCATTGATTTGAGACATCCCTTCCTCAATGACCAGTTTGTAAGGCCATCACATGAGGTTTTCTCCTCTCAATGAGCAGTGTGCACTGACCATCAAGTGGAGCCACCATCCAATTGATTACAGGGTAATAGGCTGTGAAAATCTCAGCTCAATGACCAGCAAATAATGGTTGTTGAGCGGAGCCTTTCTTAGCTGGTGATCCTTAACCACCCACATCGCGCTGGGAAAATCCCAGCTCAACAGCCCAGCATGTACTGGTCATTCAGCTGGGCTTTTAAGAGCTCGGTGGCAGAGACGCACTGCCCACTGAGCTGG…	CP110448.1	Puccinia triticina	94.473	3528	0
AATGTATCGCTACCTCCAAACCACATACTCCATCCAGTTCCCACAGATCACTACTGGGTTCTGCAGGCTGCCACTATCATCCCACAGAGCTAGGTTTTCCTCCGCCATACCACTAATCCAAATCAGAGCCCACAAAGATTCATGTCAATCACCCCAAGACCCAAATGTAGGGAAGCTACAGTCTGATCAATTAACTAACATCACTTACTTTGGTAGTTTTCTGTGTTTCTGCCATTTAATCTCATCCAAGTGTGGAATCCTTCTGCCAGATGGTTACCAAATTCAATTATTAAGACTGTAGCTGCTACATTTGGGGGTTTTGTGGTCATTAAAGGTACGCAATTAATCCTTGGGCTCTCAAGAGGTTGGTCACCATATGGCAGAAGGATTCTCACGCTG…	CP110442.1	Puccinia triticina	93.798	1419	0
CCCTCTTCTACCAGCTGCGCAGCTCATTCGAGTTCCAGGTCTCGTAGGTTGTGTCTTTGGCGCCATAGTAGTATTGCGAAATCAAATTGACTAATTGTTCGCGAGTGCTAGCGTTGCTCGAGACAACTCCATGATCCGCAAGCCATTTACGGAACTCCGAGTATCAGACCCTAACAAAAAGATGATGGGTTGGCGCCATGTGGCTGGAATACGTTATCAGACCAAACTCACAGGTTTCGTACGCATTCTGGGCCGTACTTTGTTATGCGTCTTTATCGCTCGAAGAGATCATCTCTGCTGAAACGAGTGCTCGACTTAATAGCACCCTTCGCAATCAAGTAGTCTCTCAATTGATTGTCGGACCAAGAGCTGTAGACGTAATCTTTAGCATCGTCGTAT…	CP110448.1	Puccinia triticina	95.531	2573	0
CTCCCACTCAAAGCAGCAAGTTCCATCCAGATCAGCAAGTTTACATAATGCAGTTGACAGTTGTATGATGCAGGGGGGATGTTAGGGGGGCTATTTGAGTATGCATGGTTTGTGACTGTTTGGGGGGGTGGAGCCCTTGGCCAGTCCCCTGGGCTACATCTGAAAAGGGGAGCAGCCTCCACAGGGTGGGCAGCTGCAGCCATGGACCCCGCCATCCTCATCCATGCGGTTGAGCCCGACGGCAAGGGCACTCGTCAAACACTCCGCCAGGCTCACCCCCACCAGCGCATTCCCCCGCCACCACCAGCTGGGCTGTGCAGTCGTCATCTGCGCATGCTTCGAATCACAGACAGTCAGCACATATTCATCCTCCCAGCGACGGTCAACGAGGAAGCCAAC…	CP110448.1	Puccinia triticina	92.607	4788	0
AATGCAATCCCGGTTTGATGTGTTTGTAAATCACTACAATTGGATTGCCAGGCCGAGCAATGCCAGGGTATATTAGTATCAAGGTAGGAGCTGGGCTTTCCGGGACCCCAAGGCATGGAAAAAACATTTTAAACTTAATAATTCTTTCCAGGTGTTGTTTTCCTGCATCCAAACCCAGGAAAACAACACCTGGAAAGAATTATTAAGTTTAAAATGTTTTTTCCCATGCCTTTGGGGTCCCGGAAAGCCCAGCTCCTACCTTGATACTCAAGCACACCCTCACATGCTCAGCGCTCCTGGCAATCCAATTGTAGTGATTTACAAACACATCTCAACCGGATTCCTTAGGTTGTTTCCTCTAATATTGAAAAAATCTTCACAGCACAGTTTGAATTGCAT…	CP110431.1	Puccinia triticina	94.74	3441	0
TTAGAAAATAAATGTGGTCATTGTGGATCTACCACATTGCATGAACAGTTCACTAGTGTAAAATATATATCTACTAAAGACTATGCATATATTGCTTGTTAACTTAACTAAGTCCCTCTATTGAAGGAGGGACGCCGCCCCGCAGCACTAAGTGGACCCTGTGGCCTGAGAGAATTAGCAACTTGGAATTCCAAGCCTGTGTAGCTTCATCAAATCACATTATGTGATTGAGTTGTAGGTGAACAAAAGATGCACAACATCAAGGAGAATCTTTCCACCTATTGGCCTATTTTTAGGGACATGTAATGACAGTCAAATGTCTTTTTTTGCAACTTCATTAGTTGGCTATTCCCCGTATCACACATGTTGCACTGTACAGAATCTGAAATCCATGATGTT…	CP110430.1	Puccinia triticina	94.637	1902	0
AAAGTATTATTTGAAATGGTTTGTATGTGGGCGACTAACTTTACATGAATGGGAAATGTGAAGAACAGTTAAAATTATTACTAAAGCGTATCATCAACGTCCTAAGAAATGTGAAGAGAGATTTCGAAATTTGTGCTACTTTTTGATAACTGAGAACGAGAGCGAAGGTATTGGGGTAAACGACGTTTATGAGGCTGAAGTGTCGCTTGGACAGTGGGGATGATCAGAAGAATTGGCGTTGCAGTTGAGGGTTGAGACATACGCCTTCCAGGCTTCAAACAGTAAAATCGTAAAGGCTTGACCTTCGGGACTCACATATCCAACAATTGGCTTTTCTCCGTTGAACGGCTTGGGTGCATTCCAATTTAGAGGGTCCACGACTGGGGCCACTGCGCCCGT…	CP110430.1	Puccinia triticina	96.544	4630	0
CGACGTTATTTCCGGGAGGTAAGATCAAATACAAAGGGTTCCTCGATGGCTTCGGCAGGACATCACGACGGATCATTGTCAGGCCAGCCCCTTTTCTCATTAATTAATATTACCAGCGATGTTCACCCCGAAAGAACCTCATTCGATGTCACCGCCACGCCGGCTCCACAACGTACTCTTCACTGACTCGACCAAACCGCCAGCTCACTCAACGACGACTTCTGATTTCGCTATCACCACAATGAGCCATACCCAATGGCTACCAGATACGCCCCGTTTTGACCCCCGCGTTCAGCCTCTACCTTTCAAGACCTTTTTTGTCTGTTCCCCTCCCCCTTCACCTTACTTTCTGCTCTATTATTTTTCAATTCTTCAAATTGAAGTTGCCAATTACATCTC…	CP110447.1	Puccinia triticina	94.811	1850	0
AAATTATTGCTCTCAAGAAGGGCAAGTGTAAGACCTGAGAATTTGGATAAGCAGATACTGTTAGAAGAAATTCCCACAATCAAAAGTTATTTTTAAATATTAAAGAAATCCCCACTTTGCCCTGGCAAAGAGACCATATACTTATATATTATCTGTTTTCTTTCAGAGCACAGTAACAGGTAGCAGCGGATATTCATATTACAAAACCAGGAATCAACACAAACCAGCATGAGTTTACCGTTCAGTCTACCAGATATGGAGAGCGGATTTGCTCCCTCCACCCCGTTTAGAAACAGAACATTCACAGGACTCGGGATCCTAATTTGGATTAAATTTAACAAATCCACCTCCACCACCTAGGAAAGACAAGGGAAAGGGACCAGAGAATCAATTCAGAGA…	CP110447.1	Puccinia triticina	95.284	1866	0
ACATCTCCATTGGTTAGTGAAATCATGGTTGCTGTTGGCTGATGCGATTCTCTTTCCACTCCCGTGTTCCTGCCGCCCTATTAGCTCGTATTTCCGCTCCTTCCCTGCTTAACTCAACCCGCTCCGCATACCTCCGTACCAGTTCACGAATAAGTAGCCTGTGTCAGATGGAATTGGTTCCTTGTTGGGATAGTCATAAGTTTGGTCCTGACTTGAAAACTGCCTGCTTGGTTATATCTCATTCAGATGTGAACAAAACATAACTGTATGATCCATCTCCTTACAATAGAAACACTGAATTGTTGGCCGTGGGAACAGTGGTATTCCTGGTCCTACTGGTCTAAATCCTGCTGCTGGTGGTCTTGTTCCTGCTAAATGAGGCGGAAAGGGTCTAAGAAT…	CP110430.1	Puccinia triticina	96.127	2866	0
GGTTGTGCCAGTTGTTCTTTTGATGTGTACAGATTGAAGTGCAACTACTCACGTGAGTTGAGCTCCTGAAATGAGAAGGACTTCCCGTCGTTGATCTCCGGTAACTCTAGTTGTCGTAAGCGGTTGTGTCTGCCAAAATACGATCAGGAGGTAGATAGTTGGAACCGGGGGCGTTGTGCTCCTTCTGGTGGTGGCGCCATCACACCCGAGGCGACATCTTCCCAGAAAGCTTTGCAGTTGTTGTACCAGTGTCTGTCTTGTTTGCAATAGTGGCAGTTGATGGCCCATTTGTGCTTCAGGTGTTTGGAATCGGTTGACCGCGAAATGTAGTTGCTTTTTCAATCGATAGTTGGAAACTTGGTTGTGGCAGTTGGTTGTATTGCTGAGGAATTGGAACTT…	CP110447.1	Puccinia triticina	94.962	1429	0
ATGTATGCGAGGTTTTCAGAATAAGACTGAAGGATTAGCTATCAATTTGAATGAGAATAGCAAAGTTGGAAATCCAAACAGATTGAAAGGAATTGATGAGACTTGTGATTAATTATCGAGGTCTGGTGACAACATGAGCTTGGGATAAAACGCAACAACCCAATGCCCACCCCATGTGTTGCTTCCATTGAGTCACGTGGAAAAACTCACCCGCGGCTGGACTTTCTATTAAACTGCCATCAACTATTTTATTCGCGCCACACTCAAATGGACCAGATGAGTGAGGCGTGAAAACTGCAAAGGATTTGTTTGCATTTTTTCCTTCTTCAAATGAAAATAACAGTCCTAATATATCCAGCACAAGCGCTGGAGCATCACATGAGAGGACTGATACCTTTG…	CP110447.1	Puccinia triticina	94.763	2024	0
TTTGCCTGTACTTGGTAGAATTCTGGTATTTGCTCTTCTCGGCAAATCAAGGCACTTTATGCCGATAGTAAGCCTACAGTATTGAGATTCCTGCGAAATGCATCCGATCGCTTCTCTTTCACGACCGACATCTGGTCCTCAGCTGGCGGAACCCCTTATATCTCACTCACATGCCATTTCATCTCCAAAGATGGAATCCAATTCAGCAACCATCAATAAACCCTTGAAGAGCCACCGGTGCCAACATCCACGACAAAATCCTCCAGATCTTGGAGGAGTTTTGCAATTCCGACTCAGCTCAACTTCAAACAAAAGAAAATCAATCCACATTGCTGATATTTCTCAACGACAGACAAATCCGACTCATCCAATGCCTCCGATAACAATTCCGATGGCCAA…	CP110431.1	Puccinia triticina	92.534	1259	0
CTAAACCTGCAGTTCTGGTGTCATTCAGCAGCAGGGCATCGATCAACTTCTGTAGTGTGAGTCAAACATTGTTTTAACACGGGCGCTCCCTTTCTGACGTTGATTGCCTGTTTGTAGACCAAATCAACTCTCAAGCCTTTCAGCCGTTTATCCCAATTCACTCGGTCCAACTTCCTCATGTAATTTCCGGTATAGCCAGGTGCGTGTGGAGCTGCTCTTTTCTGCTTCACGCCGTGAAAATTGAGCCAGTACTTCTCGTTCTTATAAGGCTCGTTAGACCTCCACGACACTCGAGGGCCACGGAGCGGTAGTAAAGACCTTGGACCGGTCGGTTCACTTGTGGCTACCACGACTCCCTGCTTGACTCAAGACCGCGAACGCTTGTGCCATACACTAATC…	CP110447.1	Puccinia triticina	92.112	1458	0
CAGTTGTTCTTTTGATGTGTACAGATTGAGTGAACCACTCACGTAACATAAACTCCTGAGTCTAGAAGGATCTTCCCGTCGTTGATCTCCGGTAACTCTAGTTGTCGTAAGCGGTTGTGTCTGCCAAAAGGACGATCAGGAGGTAGATGGTCGAACCGGGGGCGTTGTCCTTGGTGGTGGTCCTATCACACCCGAGGCGACATCTTCCCAGGAGGGCTTGCAGTTGTTGTACCAGTGTCTGTCTTGTTTGCAATAGTGGCAGTTGACGCCCCATTTGTGCTTGGTGTTTTGGGAATCGGTTGACCGCGAAATGTAGTTGCTTCAATCGATAGTTGGAGCTTTGGTTGTGGCAGTTGGTTGTATTGCTGAGGAATTGGAACTTTGCTTGTCTGCGGTAAC…	CP110447.1	Puccinia triticina	94.972	1412	0
TTCTAAAAGCAGCTACCAAGTAGGATTTCTGAACCCAAATAAATTCTTACCTGCAACTGTGCTACCATCACTGAGAGATTCAGACTCCATATATCCATATCAGGGTACCGGTGCTTTAGGGTGATGCTTTGGCCCATGCATCTTGCTGTGTAAAAAACAGGAGGTTATCAGAACAATGTGTTTGCTCATGAGTAAAGAAATTTGAGTTTCAATTTTCAGGTTCTCACATTTACGGCAATAGCCCGTGGCATGTAAGCAGTCCAATTTCATGCGGTGGAGCGGGACACATCAGTCAAAAAAATTAGGGGCGATGTTGGAGGTACGGAAGTTGTTTGAAATTTCTCAGCAGCTGTTGTTCTCTATCACAGGATATTCAGAGAAGAAAAATCACTTTGCTGC…	CP110447.1	Puccinia triticina	91.033	14888	0
CAACGTATTGTATGACCCCGCTTGCGCTGGTTTTTCGAAGAGGAGACTCGGAGCCTAGCTGAGAATGGAGATGGCGAGCGGAGAAGTCGGTGGACTTTGGAGTTGACACGATTCGCGGCGGCTCAAATCATACACAGTTTTCCAGATGAAACCATACTCAAATTGAGTTTGAGGTAGCTCAAAAGATGACCCTAGAACGTATCACCCTTCTTTTCGGGATCGCGGGACGAGGTGTGGCATTGCTCCGACGATCAGGAAGGGGAGGCCCGGATCTTCCGGGGATCCTTCCGGATTTGTCGATGTTAATTCGACAGCGTTTCACTTCTTGAAGGTCAAACGGGACGGGCCAGAAGCATCATCTGCTGCGGAGGGTTTCAATCATCGCCCCCATTACACACA…	CP110430.1	Puccinia triticina	92.767	12900	0
ATGCATATTGCTGGTCAGATAGGCGGGTACAAGCGTGGTTTGGTGGCCCCTCTTGTGGCCAGCTAGTCAAAACAACTGCCACCCAGATCATCAAGACTCTCCCCTCATACCATCCGCACCGGTCAATAAGTTAGCCTGGATTAGGGCACTTAGTTTGACCCCGCACCCGCACCGGGTTGGGGATGAGACCAGGGATAGACCAGCCCAGAGCTCTGTTTGGAGCTAGTGGGGTCTAAATGTGAGAACCCACTAATCCTGGTACTAATCCCAAAATGAATATGCATCATGCTTGTTAGCATGAACTTTATGTGTTTAGGTGCCAAACACATAAAATATAGGCACCTAAACACATAACCTCCAACAGCCTTGGACCCTCTAATCCCCACCCATGTGGATGGC…	CP110447.1	Puccinia triticina	96.575	1051	0
GAAGCAAGACGAGCGACCCGACTTTGATTTGAGGCTACACTTCCACAATCCCAAGTTAGCCGATGGCCAGGTATGGTTTTTTATCTTGTCTCCCTTCCCATACTTCAAGCTCATCCTCCTTGTATTAAAGATATCCACGCTGATATTTCCTTGTTTGCTTTAAAAGGAATCAGGCCTCCGTGTTATAGAATGTTAATGGTGTGGAAACTGTTGAGAGGAACAAGCCATGAACACTGAGCTTTCAGCAAGTCCCTGCTGCAGACTCACCTAGCCTAGAATTGAAATGGTTCTGATTCACTAAGTAAGGAAGGAAAACCCAGAAGACTCTGAGATATGTATTATACACAGATTTTGGTCGTGTTATGGTTGAAGCATACAGATATGATATAAGCATACTAT…	CP110447.1	Puccinia triticina	93.501	1031	0
GTGATCGATGGCAGGGTTCAGATGTGCTGAGCGTATTAAAAGACGGAATCTATGTAGCTTACTTCTCTTCCATGTTGCGCTACCTCTGCGCGGTCTTGGACAACTATCTTCCATCCCGGAAGGTACTTTGCGATGGCGTCAGGCTCCTCCATCCACCCCCACATCGACCATGATCCCATTCTACAAGTTCTTCCAATCGTAACCTCTATAATGTCCATCTCCAGTACCGCAAGACCTAGACAACTCGATCTAACACCCAAGTTATGTCGGGTAACGGTAGCGTCAATGTCAGTCCAGATCCGGAAAATGCACGAATCGCACAACATCCAAGATCAAACCTCAAGTCGGCCGATGAGAATTTGACTCACCATAGTTTTCCCAAATCTTTCCGCACAATAA…	CP110447.1	Puccinia triticina	94.901	4295	0
TAGTGTTACAAAATAGCACACTCTAGCGTCCTACTCATAGTGCGCGATGCAATTTTTAGTAGTGCGCAACTAGTAGGTACCCCCGTGTATCAACACAGGCAGGTTTGCTATGAAAGAATGTTGTACAATCTACATGGCCAAGATACATTTTCAAAAGTCTTCATCACGTGTTACAAAACATATTCCAAGTCTAGGAGGTATGCAGATGAGATAACTCTTTCACAGCAAGATAGAGAAATTGTAAGGGAGAAGGTCTGACAGGGCGGATCATTCGATATCACAAATCTGACCAGCTAGACATACAAGAGGGATGAAAATAAGATCAAAAGGAAGATACCCGAATTCTGATTCTGGGATAAACTCCGTGCTGTAAAATAAAGACACGGTATCAGTAAGGGG…	CP110430.1	Puccinia triticina	95.775	1775	0
TCACGGGACACAGGATATCCGATATCACAACGTACACAGTCTGAAGCTGGGCAATCCCATCTTTTGAAAAAGGTTGAGGCCGGGCTGTTGACATCATGGACCATGATGACGTTTGTGTGGTTCCTCGGTTAATTATTTATCTGTAGAAGAACTGGTTCGAGGCCCAGGGGAAGGGTGTGGGAATGTGAGAAGGGCATAGCGGCGCGCGGCATGCGTATTTAAGACGCTGAACATGGTCGGGCCTGCTGGAGTCTCCTCGCCACTGCCTTTAACCGACCCCACCACCTTGAACATTACAACATACATACCGGCCTCATGCTTTTCGCATCTCCTTGAAGTTGAAGCCTCGCCTCACAGTTCCGAAATGACGGACAAAATCGCTGCCAAAGTCGCCAGATC…	CP110449.1	Puccinia triticina	93.825	1425	0
CTTCATCGCTTAACCTCTCCCCATCATGGGCCCTCCCATCCATGGTACTCCTCCCATCAGCCCCCAGACTCACTGTCACGTACTCCACTCGCTCATCGATCCAACACCCGTTCTCACAACACCCCATAACCCAAAATTGTGAGTCTTTCCAACTGGCCATAGTACTCACCTCTCTTATACATGAATACGAGTCTAACTAGCTTGATGAACCAACTGCAATCAACTCTTTCAGCCAAGTTCATCATGACTCCATCGAAACCATCCATTTTGCTCGTCGTTGCGATTATTGCGGGCTGCTTGCCATCCCTGTTCATTTCGTCACCCGTGCCTGTGAGTTTGGATATCCCATCTATCTAATATCGAAACTAAACACCCGGCTTTCAGTTATTTCAGCCTTTG…	CP110429.1	Puccinia triticina	96.846	1078	0
TGTTATGTAGCCTACTTGGTTCAGTTGGTGTTGCTCCCATTAGACTCTTACCTGGTAGGCCCCACCGAGCCCCCACTTTTCGAGCACAGCTTACCAGTCCATTGGGCGGACACGTCCTGCAACCTATCATGACCAAACCACCTGATCCAGGAGCCAGCCTCCATCTCCGATTCATCAGTCGGACCGTGGCTGCCTTCGACTGAGCTATGCCCAACTCGATCAGAGCATCAATTCGGTGGCGTTATTGGTCTCCTCCAGCTTGGGATTCGGTGCGACTTTCTTGGCTCCTACCACGTATCCTAAGCGTTTTAGCATTCGCCAAAAGCCGCCAGAGTTTTCCAAACCGAGTATTTGCTGGACTGACCTCAGCTCTTCAGGGTCACTCCCATCCCCATTTCC…	CP110429.1	Puccinia triticina	93.864	3455	0
GGCGTAATTGTTGAACGTGCTGAAAGTCCCCAGCCCGACCCTGGAGAGGAATATGACTCAAAGTCATTGTCTCTCACAATGATTGGGATCCTGTTGTAAGTCAGATTTTCATTTCAAGTTGACGCTTGTACTTATATCCTGAGCTTGAGGCATGCTCCCACCGAGCTTTTCTTTTGAAGTATATAGTCCCAGCTACTCTCAACATGGTGAAAACCCATGTCCTTTACACTGTGGGACGGGAATGTTCATTCGTTGGATCTTTGGTCGATTGGGATATCAAGGCAAAGATGCCCATCATTCTGTGCGTCGAGTTGATACTGTCTGTTCCATATCTTAATACTAATTGTTCGGGGAATTAATTCTAGGTTGGTGGCGTGAGTGTTACGAGTGGTCATCAGT…	CP110428.1	Puccinia triticina	94.247	1495	0
ATGCGTTAAGTGTCCGAAGGAGCAGCCACTCTGGATTGAGGTGATGACCAATGAACATGCGTCACAACTCGCACACATAACTGGTGATCTTGTTGCTGCCGAAGAATCAAAAAATCATTGGCGGAATGTGGGTACTATGTCGGAACCTCAACAAAGCAAATGAAGTCATTCGGTATAAGGCTTGGTGGGTTGGGTTTGGCAATCACCAAGAGCCAAATAAGCACTACTTTCTCACGTATGCGTCAGTCGGTCGAGTTGAAACATTCAAAATTCTGCTATCTATTGCGGTTACGTTCAAGTGGGAAGGTCTATCAGTTTGATGTTGAAACAACCTGCACGGTGAGATGGATGCTGATGTGTACGTTCGTCAAGTCTTCGGGTTTCAAGGTGAAAGGGAAA…	CP110449.1	Puccinia triticina	94.48	7681	0
TGAGTGCAAATTAAAATCCATTCGCAAGTCCGAAAGGCTATCTTCTAGCTTATAGCTCAACCTAAGACCATCGATTGATCACAAACTCTTGAAGAGAAGTGACGATTTCTGGACTACCACAAAGTTGTATGACTGAGCCATATTCTATTATGTCAACGCTTAGAAAAACTGGGCATGCTCTCCATCGAGCTGGTATCAGCGCTAACTGTAGTAGTAGCGAAGCATAATGCCGCTAGCACTGCGCACATTCTTTGTCGTTGATACTAATAGCGGTATTGCCCAACGCCACCCGTTTCGCGAAACCCCGGCCGCTACGCTGCGTTACAACTCCTGTAGCGCAAAATCGCTATTAATTCCACTCTAGCGCAGCTTAACGGCGCTAGCACTTGGGAAGGGCGG…	CP110449.1	Puccinia triticina	97.072	1571	0
ATGTTTATGTCCTCTACTTGGTTCAGTTAGTCTTGCTCTGAATTAATGGACGGCAATCCGATCTACAAAAGAAGGAGACAACGTGGCGTGACAGTCCAAAAATTTTACATTTGATGAGACGGTATCTGAAGAGGCACTTATACTCGGAGCAAGGTGGCGAAGTTCCCAGGGCGGTTGTTTTCTCTCAGTGGACATCCTTCCTGCAGATGTAGAGTGACTGATGTGAACATTTTACCTGATTATAGAAATATGTCTATGTTGCTGAGGATTCTTTCCAGTGTGGGCAATGCACTCGGTGCAGAAAAGATTGCCTTTGAACAACTAGATGGGGAACAGAATAATTACAGCAGAGGAAAAAGAGGCTTAGACAGAATTAGGCATGAGCCTAATGTTCAAGTG…	CP110427.1	Puccinia triticina	95.592	1656	0
TGTCTATTGCTAGGAGAATGAAGCCACGTTGAACTTGATCTACAGTGGTCGTTGTTTGAAGTATTCAAATCAACCGGCGTAAAGACCTTCTGCGCTGTGGAGCATCACGAGGAAACGGAATGTTGGAATTCCATTTGGACAGGATTAAATGATTTGGTCAGATTGAGAAATTATTCAAATCTGACCAAACACCTCGTCAATGTTGGGTGGTTGTGAAGCCTTTCAAAGAGATATTGCGGAGCAAAGACCCGTATGGCAAATATCCTGATCTCAATTGCTGGGTCGTACTGGCCAATCACGAGGCTTCTGTTGTCATTAACAGCAACAGGATAATTGGGCATGCGGCTATTACACGAAACCCGGCTGGAACATTTGGTGTTTTGGCCAAATCAATATGTG…	CP110429.1	Puccinia triticina	95.33	2548	0
ACTTCAGTACCATTGGCTCAAACCGGACAAGGACGAGGATGGGATAATCAAAAGGATCTCAGTACCAATAATATGATGTTAGTCCCAACATCAGAACCTAGTGATAACGAAGAACATTGAATGTTTAAGAAGAAACCAAATCAGCATTTTTTATAACTACCGGCATCCAGCTAGGGAGTAACTTGCTTCAGCTAGTCAAGCAGGTTATATTCTGTAACGTTTGGGTTCTCTTGACTGGCCTAAATCATTTCTTCTAAAAAACTTCCAAACAAACATCAAAACAGACAAAAATATATTTCCCTAATCCTATCACTCATAGAGAATATTTTTATCATTTTCCTTACGCTATTGAAAAATCTGTAACATTAGAAAAGACTCACCACCAGTTCCAGAAACAGT…	CP110449.1	Puccinia triticina	96.536	1328	0
TCTTCATCGTCTCCTCTGGCTGCGCAAGAGTCCGTCGGCATCAAGGTCTTCCCAGGCCGTGGCACCACGTCGAACAAAAACAGCTGAATAAACGCTACCTAACGCGTCATAGGCGCGTTGCAAGACTGGGAACTGCCATTATTCCTCATCAATGAGTGAACGTCAACCTGCAACTCGAAAATGTTGGCCCCACAGAATCGTCTGCAACTTCTTAAGAATGCGCGCCACGCCACAAAGCTCCAGCTTGGGCTGGGAGTAGCAAGACTCAACGTCAGAGAACAACAGTGAACTCGTAATAGTGCCGGCCGGCTCAAGTACGTTTGAATCTTCCTGTGTTATGTGCCTTGCATGGAAGCTTGAGTCCACTGCCAGCTTAAGCTTGCCGGCCTTTGTATTTTA…	CP110429.1	Puccinia triticina	91.2	2034	0
TCACCTCGGATACAAGCGGCCTTGGGCTCACACTTTGGTGTTGGAGCTCGCACCAGACCGGTGTTGGAGCCTGGTTGAAAAAGACACTCGCATGCAGTCCGACATTAGAGCCTAGATACAGTCCGGCATTGAGCTCGGACATGAGAGCATACTGCTACACATCACAAACACTTCAACATATGTGGTGTAAAAATAACAAGGCATTGATAAAAGGCCGATAAACTTAAGGTCTTACCCTGACATGTAAAGTCTTCAGATTCACTTCGGCATCTTAGATTGAGCATGAGAAGATTTTTTACAAAGTTTCAAGACCACGGACCGAAGCACCACGAACAACTCGAAGTAATCGAGGAGCGTCCCCCAGCGCACCCTGATTCAGGGGGTTATCAACGGTGTCCT…	CP110449.1	Puccinia triticina	94.628	1601	0
GAGACGTTTGTGCACCATTCAATTTACAGTTGCAGCATTTTTCACCCCAATGTGCATGCTTGCAGCCTAATGGCAGATTTCACATGTTTTTGCTATTTTGCACCAGTGTGTAATGCCACAATCAGTGAGATGAGTACTTATTAAGGGAAAATACTCAATGGAGGACATTTGGGCACCATTTGATTCACATTTGTGTAACTTGTCCACCCCAATGTGCAGTCTATGAGCTACTTCTATTCCAGATTATCAGGGACAATGCTGCTAATAGGCCATTGTTCAAAGATGCATTTTGACATGAAGATGTAAATTTGAAACTATAGAAATTCAATTGCTTCTTCAATTCAACAATAAAATCTGCAGTACTCAAAAAAATGCAACCACTTTATGTCAAACCGCTAT…	CP110449.1	Puccinia triticina	94.873	1658	0
CTCACATTTGCTGGGACAAAGCTGAGGATCAGCTCGTGAAAATTGCACTAGAGGCTGGATAGCCAGCTGGAGCAGGTGTCATGTCAGTTGTCATCTAAGTGACTACTGATTTTTCCTGGTGCAGGGTGTTGTACATATCCCCTCAATGACTCTCTTGGCCCGTACCGGTCATCCAGAGGGTTGTATGGTATTGATGGCCCGGTCTTTTCCTGGCGATCAAGGGCTCAGAGAGCTGACTGTGAGTCAATATGTATGAATTTGTTGAGCAAATACTTCTCTGTTACTACTTTAGTAAACTCCAGGTTTTGAGTTACTTGAATGATTTATTTGTACTTGAAGAAGTTGTGCAACAGAACTCAGATTGTATTGGATGATAGGCAAGAAGCAATGCTTTGTGTT…	CP110429.1	Puccinia triticina	96.085	7892	0
CAAACATTCTTTCAAGAGGTTTCAGGAATTAAAACAAATTGTCATGAAAGATGAAAAATTTAAGATAGAATGTCTTACCTTTAGATTATTAAAAAAACAGATTCCCCAATTAACATGGGTTTTCTTGGATTTCTGGCTTCAGAACCAGGAAGAGAGATGATCTCAAATCTCTCTATGCCATCCAAAAGGGAGGAGACATCAATGGCTTCAAACAATTCTTTAATGCCATCATTCAATTTTCCACTACAAACTTAAACAAGAACTTGAAATATGGACCAAATCATTCTGCAAAAAAATGAGGTTCCAGCTTCCTCTAATTCCAACACCATCTGAAATCAACACCATCTGAAAGGATGTACAATCTTCAATCACCCGTTAAGATCAGACAAGTGATTCACT…	CP110449.1	Puccinia triticina	97.254	4734	0
AATCTAGTGTACTGTGCAAGTCCTTCTGCTGTGTCAGGAATATTCTGTTTACATCCATGTGACATCATTACATATGTACAGATTATGTAATGTGTGTAGTGTTTCACGTGGCGGTGGAAGGACTTGATGTCATTACTTCCCTGGTGGGCGTGCTGTAATGTACAGGTAGCCCTTTTGGGTTTTCATTCATTTTTGGAGCTCTGTGCCGTGTTTGGGCCAAGTGCGCAGCACACGGGTTTAGTTTTAACTCAACCTAAGTTGGGCTATCTTTTAAACTAAAAACATAACACTTCAGTTTCATGGTTATTGAAGCGTTATAAGCATATGTACATATGTATATAAGCATACAGGTGCATCACACGGGACGTGGTGCACCTGTAAACTTTGGAGTCAATTTCC…	CP110449.1	Puccinia triticina	95.996	1798	0
CCAAGAGCCATAATCTGCATCAGCCCATCCGCATAAACATCCGTTGTTGTCCTTTGCGGAAGTGGATGCCGACATCGGCCGAGCCTTGTAAGTATTGAAAGGAGGTGCTTGATCAGAGACCAATGACCTAAAGAAGGGGGAGGACGTAAATCTGTGCTAAAACGTTCACCGTGAATGCTATGTCTGGCCCAGTATGAAGTGCCAGATAATTTAGCATTCCAATAGCTTTTTGCATGGTTTTGACGTCAAAAGGGGATGATCTCCGAAGCCACAACACGATGGAGTTTAGTGGCGATGGCCTTTTACCGAGGTGGAGTTACTCATTCCAAATTCGTCGATGATTTTGTGAGCAAAATCAGATTGATGAATTACCAAGGATCCATCGGGTTGCCAAGAAAC…	CP110449.1	Puccinia triticina	94.647	6071	0
TCTCGGAATATAGAGTGTCGATAAGTGTTCAAAGCCCGTGATTTGTTTTCTTTCTTGATATCTTAATCGAGCTTGGGTCTTTTTCTTGTGTTTTTTGCTCGACTGCTATATGGAATCACTTTTTTTTTTCCCTTTCTAATACACGTCTTCATCATCAGCGTCATCATCCATCATCACCGCCATCATCATCATTTTTTCTTCCTCCTTAGGTTTTGGCAAAGCATCCCCCATCCGCTGCCTCAAGCAGATTATGTACCTTCAAGAAGCTCGTTGTCATGATCCCTAATTTCTCTCTCCGACATCATCCTAGTATAACTTTTTCATCGTGTACAAAACTTTTTGGAATCTCTCAAAGTCTCTTCCACAAACAAAAAACAAAAAAACAAAAACACAATGAGC…	CP110449.1	Puccinia triticina	92.775	1038	0
TACATTCGCTCGATAATGTGCTGACTGCAATGCCTTGGATTTTGGTAGGCACACAATGGTGCATTCGGATTGGAGGAGTTGACGCGTGGCAATCTACAAATGGTTTTGATATTTTGGGTACCTTTGTCTACAGATTAGTGGAAGATGGGGCTAAGCTAGAGGCAATGCCTTTAGACTTTGTCCGCTTGTCTCAAAGCCACACTGGCGAGTACCTGGCAAACACTGTCCAATTGGTTGTTGAGAAGTTTGCAATTTGAAGAAAAGGTTGGACAGATTATGATAGAGTTTCTTACTTGAAATGATGCTAATCTTTTCATTTAGATATGTGGTGTTGTGAGCAATAATGCTAAAATAATGAGGTAATGGTTAAACTGAAGAAGCTCAAGTCGTCTCGCTTCA…	CP110449.1	Puccinia triticina	93.32	2021	0
CTGGGGCCCCCGTTACTTTACTAGTAACGAGGCAGTTTAGGCCCCGCGTGTAACATAACGGGCCTCATTTTGAGGCCCGTTACAGCGGTTATCCCCAGATAACTCAATAATGAACCATCGCTTTAGCCACATTTTTTGCCTGTTCTCAGGGGCTCTGCACACCCGGATAACGCAACAAGCATGAAAAAAACCGGCTTAATGTGGTGCAATAACATAATATTAGCCGTTATGCGTAACACATAGATAAAGACAAAAATTCCGTTACGTTACTGTTATCCACGTTAGGCATACGTAACTCCCTTGTTGTTCCTCAATAAGCCCTTGCTATTGCCGCAAGCACTAGGTAGGTGGCATGGCTCACCTGTACATTCATCAGGAGCCCACATGTCATTGCCTTAT…	CP110429.1	Puccinia triticina	92.946	1857	0
GCTCAATTTTCAAAACAGAGATAAATGATATTTTGAGACATGCACCCTCTTTCTTATTCACTTCACGACCATCAGTTATCAACATCTTCCATGCTAAGCATGCTAGTGGCGGTCCCCAAGCGGGAAGTAAATGTTTTGGCTCCATTGGGAGTTTTTGTTTCATTATGTAAGAGATCAACTCTTTTTTGGTATTTTGCAGTTTGGGACTGGCACGTCCCTATTACCGCCCATTTCCTCATGCGCTGGCGAGTGAATAAACACTCGACCTGAGGATAACATTTTTAGCACGGAAAATATCGACCACCCCCCTTGCCGTTCCATGAACGATCCAGGCACACAAAATGGATAATTTTTAGAAGTTTTTAGAGGAGGCACATGCAAATTTATTTAGGACGACAG…	CP110432.1	Puccinia triticina	94.703	3398	0
AACATTGCTACATATAACTGTAATAAATTCTTATAAGGTATATTGGCAATTTTAGAGTTAAGATCTAGGGTTGTGCCAAAAGGGAAGAAATAAGCAAGTGGTGGCTTGTAACTAAAAGGAGAAATTTCCTAATTGAGTTAACTACAGGTTAATGGTGGAAATGTTGGGGGTACAATTCCAGCTGGGGGCCAATTACCTCCTTAAATGGGAGAGGAGGTGCTGAAATTGGCTATGGTTAAATGCCAAGAGTAGACGTGTAACTGCTGGTTAATGGACTTTTGTTGTACAATATTAGCACAACTTCCCTTACTCCCACACGTGAATATTGTATTACCAATTGTCACTAGACTTATGTAAGCTAATATCAACTGACTAAGTGTTCACTACCGTGGTACAATG…	CP110451.1	Puccinia triticina	94.146	1247	0
AGTATTAGATGGTGAGGAGGCGGATGGAAGAGTAAGGCATTGCTTACCCGGTCAATCAGCAGCAGGTAGTGTGAAATTCTCCTCTACATAGGCTGGAGCAATTAATGCTTGAATTCGAGGCCCTTAACTTTGAGACCATTGCGCGGGTCAAAGACGGAGTTTTGGAGTCTCAAGTTGGCAAGGGAGTGCCTGGTGCCAGGTGTCTGGGCCACGGCCCTCCAGCGCACTCACAAACGGCTTCCAGAACAGCACAATCTCCTCAACGTTTGCAAGAAATGCATCCACTCCCGCAAGCCAATCAGCAGCTCAAGCTCCCGGTAAAACACCTACGAGAAGATCTAGTAGATCTGTACAAAGACCAACTCCGTCCGGATCAGATTGTATATCGCTTCGTGGCAG…	CP110432.1	Puccinia triticina	96.679	2861	0
ATACCACCTCCCACTCCAAAAATATTGGAGTGATCGGAGGTTCACGCCTTTTTTGGTGTGCATCTAGTAAATTTTTGGCGTGCCTAAAGCCTGCCCCCAAAAAGCTAACATGAGAAAAAAATAAAACCAAAATTTTACTCAGGGGACCAACTGACACTGCTAGCTCAAAAAAATAAAATGTCACAAACTGAGCAAAAATCATTGGCAAATGTTTTGGGATGGTTTTTTTTTTCACAGGCTGGAGCGGGCTTGCAGTCGGGCCCAGGACCCCAGCCTGCCCAAAAGCACATTGGGTCAGTACTTAAAGGTTTTTTGCCTTGCCATGGAGCTGCTGGGTCTTTTGATGGGCCCAAAATCTCAACATGGGCTTTTGGTGCCAGAAGTATCAACCTGGCACCA…	CP110432.1	Puccinia triticina	95.361	3557	0
GAAGAGGAGCCATCTATAAGTAGCACATAACCTGCAGGGAAGCATAGAACATTCTACTTCTATAGGATGAAACAGCCATGTGGTCAGAGTAGTGGTTCAAGGAGTCAACATGATGGTGTAATAGTGGGTGGGGATGATGCGACTTCTGGGGGCTATGGTGGAATCTTCCTAGTTGGAGGAGGGGATATGTGAGACATAAAGGGGTAGAGATCTTATTCTACTCCAGATAGGAGGAGTTATGAGTTTCAGGAAGAAGTAATCTAGGATCTAACAAGAGGAGGAGTCAGGTGTTTCATGAAGTGTTTCAGGAAGTAATAATCTAGGTGGGGTTTGGGGCTATGCTCAGATAATGTGTATCATGTTGGGTTTGGAGGGTGAAGGGTTTCAAAGGTGCTTATA…	CP110432.1	Puccinia triticina	94.667	1875	0
CATCACCTCCAAATTTTTTGGAGCGTGGTCCCCCCCCAAAGCCAAAAATGTGGAGTGCATGAAGTAAAAGTTTGGAGTGCATTTAGGCTGACCCTATGTAATTTTAGCAAAAATGGCAAAAATTTCACAGAGGTAAAAAACACCTCTCAAGAGAACATGGGGAGCTGCTATGTTAGCACACCCCATTCCTGGGGAGTGCTACTGTATTCAGGTGCCTCCTTATGAAGTAACACCACCAAAACCATAGCCATGGTGCACCAAAGTGTCCCAAAAGGTTAAGATACAGATTAAGCTCTGGAAAAAAATATTGTGAGCTGCATGGGAAGTCAGCACACCCCGGCAATGGGATGTGCTACTCTGTCAAATTTTGGCCACTTTCCTACTAAGGAACACCACCAA…	CP110451.1	Puccinia triticina	95.444	1690	0
CCAAATCCTAACCTGCCACTTACCCTCCCCACAGTGAATCCCATCATCCTTGCTGGTCTTTGCCGCACATCACCAGCAAACCGACAATGCGTCGCCCTCCAGTTGCTTCTCGCAACCCATTCGTGCCGCCTGCGATACCGTAACATTCTCCACAGCCTGGTGGTTATCGCGAAGTTAGCTTCAACGGTTTATTCAGCATCACGAATCGAAGCAGACAATTTGCTATGGACCAAGATATTGAATCCAGTTCGCCCGATGGCATGTGGCCTAACTCAGATCAACCGTGGACATCTGTCCCATGGAGTAACACTATAACCTCCCCGATAACTGGAAGCTGCGCAAGCTCATTACAACATAGATCAAGCCTCCAATTCTGTCGGGCAAGCACTTTCAGCATTC…	CP110451.1	Puccinia triticina	91.255	5420	0
TTGAAAGGATCTTGTGTGCTCATTTTTGACTAAACACCTTTGAGCTTCTTCTACTCTTAATCGTCATTAAAGCTTTCTCTTCAGAAAGCACCGGGTCCTGGCACAAATCAATTGATGCCCCTTCGACTGTTGAAATCTGAAAGCGTGTTTCGGGTATCATCTGCATCCTTCGTGGATATATTTCCGATTTCCACGCATCGTTGGTCAATCCGTGATAAGTGTCGAATCAAATGATGCAATTCTCTTCGAACGTGGGATCCACACCGACAGGAAGCTCTTGGTTAAGGGTTGTGGTATTGTAAGTCATAAGTATCGAATGCTTGAATTCCAGGATGGCCTCCTTTTTGCTTAGTTCAGACTGTCGAGAAACGAAGCGATCTTGAATTTGTTGTAACCAAT…	CP110451.1	Puccinia triticina	96.933	2315	0
TGAGCTGGGTAGCTTAAAAATTCAATGACGTGTATAGTCAAGTCCCAACAATGGGGGTAACATTGAAGCTGCAGGCTGGAAAAATCAGAAGTGTGGATTTTCATCCTTTTTTGGTGGTGCTCTGCCCACCCAACAGTTGCTTTAGGCTAGCTCCCTGCGGCAAGGGTGGCTTTGCCACCACCCAAACTTAAGCTCCACCCAAATGAGCTACCCCCGTTCCACCACCCGATCTCCGATCTCAACCTCCCGCATTGGGAGGGACTTTGTTAAGTTAGCACTTGCGCAGTTATCAAAACCGCAACATGAATCCTACACCCGGGGAGTACCTCCACGCGGGACTGACTCGGAAATGATGAGGAATCCACGGCAGCTGCCCCTCGCGGGGGGCGGACCAGCGGC…	CP110432.1	Puccinia triticina	94.969	2743	0
AGAGATTATTTGCAACTAAGCTCATCTTGCATTTCCGGTCAGTACATCCACTCTACCTTTCTAACCCCCTAAAGTTCTGTCCCTAGACCAATACGTTTTCAGTTGAGTATTTCGGTACATGCGGAAAGACGAGGCTGTGCTGATATATGATGATGATGATGATATTTACCCCCAGACACTCAGGCGCACCCGTGCACCAATGCACACAAGGTGAGCCCTGATTTTGATTTTGTTCCTGAAATGCTAGTGATCCCGCCGAGTCTCAACTAAATTCGATGAAGATGCCAGCAACTCGACCGGTCCCTCGACCCCGATGGCGAAGACCGGCTCGAGCGATCTGCGCCTGCAGACGCCGGCGGTCGGTTGGCCGGCCTCCTTCGATCTGTCCGCCGTCGACCT…	CP110451.1	Puccinia triticina	94.758	1240	0
TCATAAATCACTTTTGCATACTGTGAAAACCCATTCATTAACCTTTCCACATAGGACCTTAAATCAGAGGCAATGGTCATTAATTGGTGTCTATACTTTGCCCCTTCCCACGCCAAATGTAAGTCTGACTCATCCACCAATGGATGTGTTAATGTTTTATCTGCTTGCTATCTAGATTGAATTTCTTCAGATCAAAATCCACAATGCATGTTTCACTTGTTACAAATCACAAGACAAAACTTCCCAAGTCATAATCAAACTGCACAACACTGAATCACCAATTCTTGCCTGCAATCAACTGAAGATCACCCTTCCCCATCACCTCCATCTGGCCCTACCCTAACTTTTCACTCAAAAAGGAACAATAGAATGTGATGGTTCTTGGTCTTCAGGGTTTTA…	CP110432.1	Puccinia triticina	95.041	1109	0
TGTTCGGCAACCGCACCATCCGCCCGCCCAAGGGGTTTCAGCCTCTCCCCCGACCTTCCATTCAACGCTCTGAAGATGACACATAGATTATCGTCGTGAGCTGCCCCTAACGGTTTAACCCAAGGGGTTTCCTTTCATTGGTCGTTGCGCGTAACTGCAAATCTTCCAAAACACCCCAAAACACATGGTCATTCTCACCCCGCACGTGTCTCCATAACCACAGTTTGGAAGGTTCGCACCCTTTGCTCCTGGCCCCGTCGTCACTTTCTCAGCCCACATCACCGCCCCTTCGCAGCTGACACATTTTGTTGTACTTTTTCGACATTAGTGAATCAATCAGCTGACTCGCCCGCGCCACGATGCACCCTCCTGCCCAAGCTGGTCAACTTTACCGTTGAT…	CP110432.1	Puccinia triticina	94.633	4472	0
GCAGTGATGCTGGTGTTAGGGGGCTAGGTTGCTGGTAGAGATTTCATTTCAATTTTCAATGTACTTGCACTAGTTCTTCTTGTATTTAATTAGTGGAAAAACCCTTTGTTTTGTCTGTTTACCATATATTATTGAGGCAAATCCCATCATCTTTTTTGTAAACTTGGTCAACTGTAGGGAAGCCTCCATTTTTTCTTTTCACAAAACTGTGGTTTTTATGGATGTACACAGTGAGAATTCTTTGACCTAGTAAAGAAAGTTACAAATCAAGAATGCTTTAATCCTAGTTAATCCTTAATGAAGAATTCCAGAGATACAGTACCCATCAAATAGGCTGAATCTGCCTTCTTGATAATAGTTTTGCATGGTTGCTCTAGCGAGTTGATTAGTGCTGTATCT…	CP110450.1	Puccinia triticina	95.736	3565	0
TATGTGCCCTGGTTACTGGTTCAGTTTGGTCTTTGTTGATTTCTTGCGGAGTGTGGAGCTTTATTCACTTGCGGATTATTACACTATAGATCAGGCACATTGAGGAGCGCTAAAGGCTAGCGGATAGTAGCAGTGTGGAGCCAGACACCAATAATCACTAGCACGAGACATTATTCTTGAAGAGGCGGCTCATGGACATTTCTACCCACTGACCAGCCTTTATTCTCACACTGGTTGGAGTGAAAAAAGAGTTTAATCTTGTGCAAAACTTTTCAGGAATGTGTGGGATTATCATTATTTCTACACCCAGAAAGTCCCAGGAACTGGGTGAGGATCAGTTCATATTTGGCAGGAATTTATTTTCCTGCTCCTGGAACCTGATTTCAGTCCTGGGTGCGG…	CP110450.1	Puccinia triticina	94.536	970	0
CCAATTCTTACGCATTGCTCTAATACTCTCGACGAGAACGAACTACGCCTCATTCGACTGCCTGCAGTCTCCATCCATCGGGCATCCAAACACACCAAATCCCCCTCCGCAATCCTCAACGAGAAGAAACTCCACAATTTCTCACCCCATGCAAACAACCCAACAGCAACAACAGAGAGGCCGCCTCCAACTTTGTCGTCTTCGAACTCTGCGACGAAATCGAGATACACCATGTCGTCCTCGCCAACTTCGAGTTCTTCAGCTCCATGTTCAAGCTCATCAGGATGTCCGTCAGCAGCAGCGCACTCGAGTGCATCCGAAGGGCCGACTGGGTCGACGTCGGATTCCTCAAAACTCACAACACCCGCGGATTCCAAGTTCAGTACCCATCTCCCCTTC…	CP110450.1	Puccinia triticina	96.325	1279	0
ATCTGGGTGGATGAATGTGATCGATAAACTGGACGCAATTAGCGAAACGCCTATGGCAAAGTTGAGTAAACCGCTTAAACTAGGGAACGCTGCTAGATGAACCCAATTTCTTGTCTCTCTCGGCTTTTGAATGTCGATGATAAAAGTTTGGCATCTTGCCGGATTTATCTGTCTGACGATCCGTTCATCTCATCGATTAAAAACTACAAGGATTCACCAGCATCTTTGTGCATTTCATGTGGTGGCCGATGAGCACGGACGACAAATCGAATCACACCATTACTGCAGCTGCGTTTCGCCCGAATTCCATCAATGTATTATCTATGACTCCGATAAGCCTAACGCACGTTTAATAGGCGAGTCGCCACGTCGATCTGCCCTCTTCTGCCTCTGCAAAAT…	CP110433.1	Puccinia triticina	96.328	2832	0
GAAACAGTCTGAAGGCAAACCAATCTTAGTTGCTGTTTGATCAACAAGTAGATCTTCCGAAGGCTCACATGCCCAAAGATTTGATGCCAAAAAAGGAGAACTTTCTCTGCCTCAGTCAGCGACTCAGGTTTCCACAAGGAGGGATATCTCTAAACGGAGTAATGAAAGGGTTGTTTAGGCAAAGTCACAAGGGATGTGCTCTCCACAGGATTAAAGTTGGGAATAAACTAATTTCATTTGCGAATGGTGATGAGAAAGAACAGACGTTTTTTTTCAAGCATGGAGGACAGAGAAACAGATGAAGAAAAAGAAGAGACAGCCATTGCCCGTAGGGGATAATAGCCGTTGACACATGTTGTTCAAGTCGTTGTCCAGCCAAACATTGGTGCCTGATCATAG…	CP110433.1	Puccinia triticina	95.603	1774	0
ATGGTGCCTCTCATTCCATGCAAAAAGTATTGCGCTCTGGAGCGCGCCACGCCCGGGTAGACAATCATTGATGACAGAGCAGACAACGACTCAACAACGTAGCCAACGTCACTTTCTTCTTTAAGTTTAACTGGTGTCCCGGCATTCTCATTTCTGGCACGGCGCGCAGTACCTCCGAGTCCAGCGCAACCTGTCTCTTCGGCTCACGAGAGGTTCCGTGGGCTCAATGTATAGCTCGGTTGTTTTGACGAAAGTCAATAATTTTAGGTCTGGTAGATCTGCCAGGGTCCAGAAGCTTTGGCAACTCCGCCCGAATTTCGTCACGTTTCACCTTATCTGAACGCCCGTCCCTTCCGTTACGCGGGCTGCCCTTTGGGAATTCGGCAAGAGAAGGAGGAC…	CP110433.1	Puccinia triticina	95.716	2334	0
GCCATTGCTATTACAGGCAACCCGGGCCACCCACAACCACAACCCCCAACCCAGCAGCTCAGATACCCACGACTCTAACCCGGTCATCACCACACCCCTTCACGCGGCCAGCCACAGCCCCATTCAACCCAGCCACCTCTACCAAACTCCATGGGTTCAAAGTGCCAACTCCAGCATTGGCAGTCACCGCAGGGGTCAGAGATTACAACAAGAGACTAAGTTGCTCCCATCGGGCCGGAGGCGGGGAGCCCCTTCAACGACACCGCAATCCTGAACAACAATGACATTGCCCTTCCCAATTTTTTTGCAAAGAATCTCATAAGGGAACCTCTTTGACAGCCTACCCTTGACGAGTTCAACGTGTGGGTGGAAGAACAAGCGTTCCTCCACCACGCCAAG…	CP110450.1	Puccinia triticina	93.299	2164	0
CGAGAACGAACTACGCCTCATTCGACTGCTCAGCCTCCATCCATCGGGCATCCAAACACACCAAATCCCCCTCCGCAATCCTCAACGAGAAGAAGGAGCAAGTATTGCTCACCCATGCAAACAACCCAACAGCAACAACGAGCAGGCCGCCTCCAACTTTGTCGTCTTCGAACTCTGCGACGAAATCGAGATACACCATGTCGTCCTCGCCAACTTCGAGTTCTACGAGCTCCATGTAGACCGAGTCGGATGTCCGTCAGCAACAGCGCACTCGAAGGCATCCGAAGGGCCACGGTGGAGGCGTAGGGATTCCTCAAACCACAACGCCCGCGGATTCCAAGTTCAGTCCGTCTCCCCCTTCCCTTCCCATCATACCCATCAAACTTATACCCATACCAC…	CP110450.1	Puccinia triticina	93.966	1276	0
CTTGTTACTGTGTGTCACAAAAACCGTGATTCTCCTGCTTGTTTTCCTTGCTCATGCAAGCCCCATGTTGCTTACATACTTTTGGGCCACATGAGCAGGGCTGAAAGTTTGGCAAACTTCTACGTATTAAATACTGCATGAGCAGTGAATTCCTAATGTAACATCCTGTATGCATTCTATTTTCTTTGGTTGCAATTTTATCCATAGGCTTCAGGATATCTAGTGGGAACTTTCACTCATTTGCCTCTGTCTCCGGTTAGTTGAGCTGACATCAGTCACAGTCTTGTACCATAGGCAGACCTCATCCTTTCAAGGTTATTCAACACTTGAATGGCTTGCGGTAAAACTGTAGCACATTGTAGCGCTCTTCCCACAGCAAAAGTATGTATGATTTCTTTT…	CP110450.1	Puccinia triticina	93.746	2782	0
TGCCATTTTGCTCATGTAATTGCACCGCCGTTACGCAACGCGTAGATCACGACAAAAATTCTGTTACATTACCGTTATCTACGAATTTACGGTGTAGCTGTAACCTCGCTGCAAAGCCCTCGCCTTCTGGAAAGAAGTTGACCACCGGTAATCGCCTTATCCGCGATCCGTCAGAAATTCCTAAGAGCTGCTCTTTTGACCGTTCAATAAAAGAAGCGCTCACCTCCGCCTCTGAAGCCTAAAAAGGCTGCGGACCCCCTGGGCAGCACTCTTTGCTCACTCGGCGCAGGCAGAGGAGCTTGGTTCACCAGCCGTTCATGTTCTCTTCTTCAAAACCTCCTCCGGTCAAACTTGTTTTCCGCTCGTCTGTCTTCCTCCAGTCGCACCCCCCTGGTTCAT…	CP110450.1	Puccinia triticina	96.352	932	0
TTGTTTGATCTAGAAACAAAACTTTTTTATGCGAACTGTCTTCGCCACCCAATACAGAAGCCCCTCCCATTCGGAAATGAATTTGAACCCATTGAGGTTGAGAGCGATGGCTCCCAAGCTTCTGATATCCCTATTGCACTGACAGTCTTCCGCGGCCACATTGGGCTGGTGTTGCCGCTTTCGGCAGTCATTGCTCCAACCTCAACTGGTTCAAATTCATTTCCGAATGGAGGCTCTATTGGGTGGCGAAACAGTGCGCATAAAAAGTTTTGTTATTTGAAATCAAACAGATTCCTCTGATTTCTTTTGGGCGTGTGATAGGGACAAATCGCGACTGGATAATGACAAAGGGGAGAGGAGGTAGTCCAAAAATAAAAGGGATTAGAGGAAGAGAGTGGT…	CP110450.1	Puccinia triticina	91.68	7428	0
TCCACCGTTCCAGCTCAGTTGTTGGTTTGTATAATTCAGAAGAGAAGAAGCTAGATGTCTTCTTCTTTGAACCCGGGTTCAACTGGGTTTGCTGAGGGGATTGGGCATCTCATTGAAAGTCTTGGAAACCCCACAGAAAGTTGTGAGGATCGCCTCGACTGGCATATCATAGTGCTGCTCCATAAAGGTTTTGTTTCTTTTCCAGACGGCAGTCTTGAAGGTTGGGTCGAGGATCATTGCACATATGTAGCTTGGTTTGCCAAGTGCGCAGCAAAGGTAGCTTTCGATCTTGTTGATGATCTGGGTGGCAGGTTGGATGAGCTGTGCTTGGTCATATAGACCATGTTGAGCTGCTTCAAGTGCTTCATCAAGACTATATAAACAGGGAGTGCGGTGTTT…	CP110433.1	Puccinia triticina	97.377	3279	0
GTTTACACCGCAATTTCGGTCTTGGGTTTGCGGCCCAGCTCCTTCGTGCAGGTTTATACAATTTTGGTGATGATGCACTCAAAAAGTTGATAGACTCCATTAATTTGGAACTTCGGAATAGCTCATGCCGCAAAAATGAGAAAAAACCCAACAGGCGAGTCTATGTTTTTCTCTTGTTAAAAAAATTTCTGGAAATATAGAAACAGTCAAAAAATAGAAATCTGTGTTTTGACTTGTTAATGGCGGTGATTTGAGATTCCCTTTGCTAGTTCGTAGGTATACGGATGTAATTCGTGCAATGCACAAGTCGTCTATTTCGATGCCGCCCACAGTGTGCGGTAGTGTAAAGCACTTCGCGTACTGCAAAACAAGAAAGATAAATTTTCAAATTACCATAAT…	CP110450.1	Puccinia triticina	93.517	2144	0
ATGTCCTCTACTTCAGACATTGGTGTTTGCTGTGGCTTAACCTCCAGCCGTCAACCGTTACAAGCTCAGCCCTTCAACTCTCGAACTCGCTCTCGGTCTTCTTTGTAGAGACTTGGCCTAGGCCAGAGTCAAGGAAGCGCAAGGAACTGAACCCTAACCCCGCAAGGGGGTGGGTGAGTCCGCGCGACCCTCAGGCGCATGCATATGCATGTCGCTCCCAGGCGGAATCGGATTATGCTAACGCTAATCCTCCGCTCCTTATAGCCACATCGACACAACAAAGAGCCTAAGCAATACAAACAAACTCTACCAGACTCAAGGTATGAAGATTGTTGTATGGTCCAGGCTGGGTCAAGCAGTGCTGACAGATCTTACTCCTTACAGCACGCTTGCTACCAA…	CP110450.1	Puccinia triticina	94.035	1643	0
ATCTTAGCCCGAGCTCAAACGTCCTAGCAAGGAAAAACAACAACTTGGATGGGGAGGACACAGACGGGCAATGCGCTGGGCCATCAATTGTCATGACCAAGTGTGGTTGTACTTGGGACAACTTTGCCGAGTAACAGAACAACAGTCTGACATCCTGCGGCCCTGCGACCAATCTATCTCATCAACTTCTCTCCTCCCACCAAAACCTCTCCGACCAACTTAAATCAGCCAAAGTGCTGGCTCATAGCAATTTGATTGCAAGTGAGCAAGCTTCAAGTTGCATGGGACAAGGCAATTGTGGCAGTTGTCGGAAGACCACACCACAGTCCAATGATGATGTGCTTCTACAATTGTGGGAGCAGCAACTCAATAAGTACTGGCTCGCTCCAATTTGGTTTT…	CP110434.1	Puccinia triticina	93.802	4292	0
TAATGTATTGCTATATTAGAGAAACACGATACTAGGAAATACGATGCTTGTATCTCCGTTACATTTAGATCATCTGATTGAAATCCAACCACAAAGCACAGATAATCTTGTAAGAAAGGAATATAAGACAGTTGTAGTTCACGTTGATTGTTTTCTTCTCTTTCTCCATCGATATTTTGTTTTCTTCTCATCATCATCAGAAATCTGAAAAGGCATTCTTCAAAGTTATCAGTGAACTATCGTTAAGAAACACTCAATCTCTTATAAAGTTGTATCACGCCTTTCGTTGTCATTAGCTCGTCTGTAGACATTCGTGAGAATTCACTTCTTGGCCTGTCCGATCCTTTATCCAGACCTTAGTCATTACAATTCCCCTCATTCCACGTATTTAATCTGAAC…	CP110452.1	Puccinia triticina	95.349	2279	0
CCTCCAAAATTTATCCTAGTATCTAATAGGAATTGGCCGTTGAAATCCTTCACTAGTAAATATTTTCACTGGTCCATTCTGGTGGGGATTTGCTGGTAGGGCTTTCCAGTGGGCCAAGGATAGTTTGATCTTCCTTCAACCAGGGCATGTCGCACTCTCTAGAGAGTGCCAAGCTGTAACTTTATTGAATTAGGTCTGATGTGAGTTCAATTTTAACCTTGAATCTTTGTTCACTTTATTTCCAACAGTACAGGCGTAACTTTAGTTCAAGTTGTTTTGGAATAATATTTCACACAATTCCAACACATGAATATATCTCTGCTGAAGTTTTGTGCTGGGTTCATCATTATCACAATTGTGGAATTGAGCTTCAATGCACACAATTTTATCCAATAATTC…	CP110452.1	Puccinia triticina	97.263	1096	0
TTTGTAGCCTGACGTACGTATTGCTGGTAGATCTCCTCATCCAAATTGCTGAGATGTAACAGTAACATCTCATATTTAAATGGCCAGTTTTTTCTTGCGGCGAGTGCGACAACTAATCTGAGTGAAGAGGGCTTTCCGGTGGGCGAAAAGGTTTGATGAGGAGTAACGCTACGCCCTCTTCCTGAGTATAACCCTTTGCCACAAATCAAGCTTTGTATTTCGAAATACTTCCATCAGGAGAAGCTTGACTTGAATGCCCATCTTGGCTTGATTACTTTTTGATTTGGCGGTCGCGGGGTTAAGCTTTGTATCTCGTTTTGATTTCATTCCTTCTATCTCCTTGTTAAGTGCTTCAAACCATCGGTCTTTGAATTTTGGTGTGTTCAGTCTTTGAATTGC…	CP110434.1	Puccinia triticina	92.53	2771	0
GTCAAAACCGTTTGGGCGGCTAGTTATGCTTGACATGGGTGCCAGGCTGGGGGAGGGGCGAGGGAGGCAGGAGCAGCAAAGGGCCTGTGTGGGGGAAAGACTGGTACACGCGTAGGGGGTCAGAGATTTTTATTGCGCGTGGCGCCGCTAGAAGGCCGTGGGCAGCAAGACATCAAGACCTCAGACTCCCAGCCCTCAAGGCTTTCTCAGGTTCAAAAGTGCAGCATGGTGTTGAGGATTTCTTTTTCTTCCTTTTTCTTCTCCCTTCTTCCTGTGTTTGGTTGTTTGTTTTCTCATGTTAGTTTCTTACTTAGTAGGGTTGTCCTTTTCTTCTTTCATTCAGCGCGTAGGTTAGTTTTTTTGGGTGAGGAGGGGTTGGTCTTGGTCTTGCTTTATTTT…	CP110434.1	Puccinia triticina	93.656	2191	0
GTATAGTGGCAGTTCTGCGAGGGGGAAATACCAGTTATAATATTTCAAGATGTATGAAGCTATTACAACTGTTACGGGTGGTTTCAAAGACCTGCCCCTCTATGATACTACGCAAGAGCTATCACAAGAATTTATTTATTGTTGTGGCAAAACTAATGATAGAGAAAACTATGTGCAGCAGTCTCTTATCAGACCTAGATCAAACTTGAATTCAGCGGAAAGTGGATTTTGTATGGGGAATACAGTTAGAGTGGTTTTACAGCAGCCTTGAGTCAGATAACTGAAATGAGTCTTTAACGTAAGATATGTTTTATATGGTTTTATATGTTTGTGATATGAAAGTGGAGATAAACTGATAAAAGACTTCTGTTAGAACTGATGTTATATGTGAACTATTCA…	CP110434.1	Puccinia triticina	97.005	1302	0
CCCCACCATTTACTTGCAGCGGAGAGGCCCCAGAGTTCCTGCCGCCAAGCAGCGCATTGCCCCCTTGCTACCCACAATTGACTTAGCCGCCGAAGAGGCCAGGGTGCCTCCCGCCAAGGCGCCCACCAGCCCCTCTCTCCCTGCCCTCAACATGCCAGCCTACATCTTCAATTGCTTCCCACCAAGGAGCCCACCAGCTCTTCCCTCCCTACCCTTGACTTGGCCACCGCAGAGGCTACGGTGCTTCCCGCTGAGGATCCCATCAGCCCCTCCCTGCCCTTGACATGGCCGCCAAAGAGGTCAGATTCCTTGCCTCCAAAGAGCCCACCAGCTCTTCCCTCGCTACCCTTGACTTGGCCGGCGCAGAGGCTACGGTGCTTCCCGCCAAGGAGCCACAAC…	CP110448.1	Puccinia triticina	82.277	1168	0
GGAGGAGCAGGTGTTGGCCTTGGTGGCCTCGGTGAGGAACAGGCGTTGGCCTCGGTGGCCTCGGCTGTAGGAGCAGGGTTATCAATCTAAGCCTCACATCTAATTAGTAAGTCTTACTGTTCATCTCTACCCCAGCGTAAGCTGACATGTTTGTGTGCTCGGCTTATCATTTAGATCCTTCTTGCATAAGCGCGCATCTTGTTGTCTTGTTTGTAACCCACCGGATAGCTGGCTGTTTGTTGGACTGTCTTCAGTAATACACACATCACAATCCGTGAAAAACTATCGTTAAGACTGAGCCCCATTCCATGCTAATGGTCGCGAGCGTGCTCGGGCAGTAAGCCAAAGCCATCAATCTATGTAATTGTCCAAAATGGTTGGTAGCACGCTAGCCGCGCC…	CP110452.1	Puccinia triticina	96.338	1966	0
TGAGAGTGGATGAAACGAGCCTCCAAATCTGGTGGCAGCGATATAACATACATATAGAAAGTTTTCCGGCAAGAGGGGACCGGCTGATGATCTGACTCCGCAGAGCCTATGAGACCTTGACACCTGACCTTGACACATAACCTTGGAAAGTGATCGTCTCGAGGTTGGTCAGGAAATAGTTGGAGATACATTCCACGTAAAGCCTATAGAGGTGATAACTGCGATGCTGAGGCTTGTATGACGCAAGGTAGCAGCGGAGCCACATGGGTGATACTTAGTTGCGAGAATCAAAGATGTAAAGGAGAGTAAACAAGTTTTGAAAACCAATCCAGGGCCCTCCCAAATGTGACTGTCTTTTTCTTCTCCGTTATGTGTCCTCATCATCAACAGTAACCGGAC…	CP110452.1	Puccinia triticina	95.197	1166	0
CTACCGAGCTGCGGGGATGGTCTGAGCTGGCGAGATTGAAGACGAACTGGATGGTGTAGTTGCTGAGGGTACCAGCCCGAACGGGCGTCGAAGATGTGTATGTATACATGGATAGTGCTGGGGAGGGGCACTGACCTGCCCTTGACGAAGGTGCAGGGATCGTGGGGAGGCTGACTGGCACGGCGTGATGGTCATCGACTCGACGGAGCCATCGACCTTGTAATCGGGCGCAGGACCATCGGTGAAGCGGACGGTGTTGCTGCTGTCGGCGGGTCGATCGCCTGGTCCTGGCTGTCGACGAGTGCGGATGACTGGACGAGGAAGGGGGGCGCGGGCCAGGGGGGAGCGCGCTCCGGGCGCAGCCGGCCAGGAGGAGCACGGCCGCTGCTAGGCTGCTGG…	CP110452.1	Puccinia triticina	94.077	1756	0
AAGACGGCAGCCAGGCAGTATAACGTACAGGCGGGAACGGGGATGAAGGCCATGGTGATTGATAAACGTCTGGGCTTTCTTTGCAGCTAGATGTTGATGTCCAGGTGATAAAGATCTTTATGAAACAGTTGCTTCAGCTGATTGGGCGGTTGAGGATCGACCACTGCGATGCAGGCCTAGAGTACAGATGTATATAAAGATAAAACAGTCGGATGTCTTAATGGTTCTCAAAGTTCATATGTGGCCAAGTGAGCCAAGTATTGATAGTTACAATTCCAAAGAACGAACCGTAGAGATATAGTCAGATCTCTCTCTCTCTCTCTCTTTACACTAATGGCTTGAGATCCGAATAAACACACAAAGCAGGAAGTTACGGAATCAGTAGAATCTTCAGAGGGT…	CP110434.1	Puccinia triticina	91.216	5442	0
CTTTAGCGTAGTTTAGAACAGCGGCCCACCATTTCTCACTCTGTGTTCTTATGTCTCAGTCTCAGGATGATTCATCTCATCAATTTAACTAAATTTTGGCAGAAATTTTACAGACTTACTTTGCGCACTGCAAAAGACTTTTGGTGCAAAGTGTTTGGGAAATGTGTGCACTGCACAGTGCACAAAGATTTTTTTGCAGTGGGTGAAGTAAGTCCAAAATTTTATACATTTATGCCATGTTTGATGCCTACCCTTTTGGGTTTCAATGCCCATTCATACAACATATCCATGCCCATCATTTTGTAAAAAAAAATGGAAAAAAATCATATTTACATTTACATTACCCACCTACTTTGGGGTTTCCAGGATCCTGTTTTCCCTCGCGTGGCCCAACCAGTT…	CP110434.1	Puccinia triticina	96.187	3436	0
GGCCTCGAGCAGTCCAGACTGGCGGACGAGCTGCTTTGAGAGCCGGAGAGTGGCGGATAGCTGGGGTTGGACATGGGACCAGGTGGGGAGGAGATAGTGTTCGTAGACAGGCCTTAGTTTCCGGTGGAGGCCCGTTCTGGAGGGGGTACCGGAACTGGTTGTTGAGCTGGTCGAGATAGGGGGAAATGTGGGGCTCCAGTGCCCAATGCACTTCGGCCAGGTTCCGACAGACGACCGGGTTCGAGCTGGGGTTCTGGGACAAGAAGTAGAAGTAGGCCAGGCCGAGATAGCAGACCAGGACCTGGAGCAGGAAGGAGAAACAGCCAGCGTGATCGGGCTTTTTTGGCGGGGGTTTTCCGCGCTCCGGAGTGGTAGTTGGCGGCCGTTTCTTGGGCTTGA…	CP110452.1	Puccinia triticina	96.373	1020	0
CGGCCTGCGGCCTGAAACCCGTGTCCGCAATGAGACGGACTTTGGGCCGGGCGCGGACAGTGCTTTTGTGAAAATATTACACTTTGGTGCAGCCTGTTTAATTCACTACGGTGCGGGCTCGGCGTGGGCTGTCCATTCGAGGCCATGGGCTTTCCTACATACATTGGTCACTGTACTTGACAACTCCGCCATAAGAAATGTAGAAAATCCAGTGTTGAATCCACCATCCCATCTTCCCAGTCACAGGCCAACTTCTGGGAATATACTGACAAATTTTCTACATTTGTTTAGTTTCAGACTAATTAGAACTCAATTCTGTGAGTATGAATCTTCAAGGATTCACGGGCGCTAGGAAACTTGGTGTAACAGTTGTGGGTAGCTTAGACAAGGAGAACATAG…	CP110434.1	Puccinia triticina	94.592	1849	0
CCATCACCAATTGCCGGAGCGTACTCCTCAAACCTGCAGGAAGGATTGGGTGGTTCGTTTTTCATAGAACCACGACCATGCTGGTTAGATGCCAGCACGGTAGGAGAGAACGCAATCCGGGATTCTTCCAGGGCGCCCTGCGTCCTACAGTGGTGCGGAGCCCGAGTGGCAGAGGGGTTTTTGTGGAGTTGAAGTGCTACGGACTCATCCAAGCGCGTCTGCGAGATGATGTCACAGAACTGCGACGCGCCCATCCTGCCCTTGTCTGCAGGAATACTCGCCGCCCCAGTCCTCCACCACCCGCACATTTCACCACCGATGTCCTATCTCTGGTGACCTATCCCATTCCAACCCCCCCGACTTTCTCCGATCCCAGGCCCATCCACGGCAAGCAACGGA…	CP110454.1	Puccinia triticina	91.449	1953	0
CACAACAGATGGATGTCTGGGAATCCAAACCCATGCCCGCAGGGACAAAACCCCTTGATGGGCGCTGGGTCTTTGCCAAAAGAGGGCGGATGGATGGGCTTTCCCACCGTTTCAAAGCCTGTCCGTGGCTAGAGGCTCAAACAAGTGGCTGGAAAGGATTTCAATTTAACGTTTGCGCCAACGGCAACGTTTGTCTATCCGGCTGTTGTTAGCGGTGGCGGCGCGTTTTAACTGGCCTGTGCCTTTTGATTTGTGGCGGCATATCTAAACTTGTATTTGATGAAGAGATCTGGGTGAAACCCCAGAAGGCGTTAACGTCCTGGAAGGAAACGGTTTCCTACTCAAGAAGGCGTTATATGGTACACGACAAGCGGCGCGATGTGGTGGCTCCACCTGCGA…	CP110454.1	Puccinia triticina	94.625	1507	0
TAGCTTTCAATGCAGGTGAGCATCTATTTTTAATCCATTGAAAAAATAAGGTTGTCTTATTGCTCACCAAAGACGTACCGTTGCCCAGCGGTTTTGACGCTTGCAATGGCTTGCTTATACTTCGGCATGTGTCTTTTTTGGGCCGATGATTTGCTTCGGAAGCCGAGTGGGCAGAAAAAAGTGTAATACCTGAAACTTACCGACTCAGTACTAACGAAATGACAACTCGACTCGAAGAGAAGGACCAAGTGTGAAGGTATTGACCCGACTTCTAGTGGGCAACACTTCAATGCCCAAGAAATCATCTCCGCACTTTCCAACCCCTTCAACTTCCAATCTTCAATCCCTTCTCTGTTCAAATGTATATCTCCTTGCTAGGAATTGTAAAATGACCATTTG…	CP110454.1	Puccinia triticina	94.971	2764	0
CCATCACCAGAAACTGGTTTATCTCATCTGCAAAACTAATATTATTGATTTTTGATTAACTGAGGAAATATCACCTCGAATTCTCCAAAAAGACTGTTTGATAAATCAAGACTGAAAGCTTCTCATGCACTTTGTTTGATAAAAAATCGCAGATGTTTTTACGCTTTTTGATGTGAATATCTTCGTCAAGCAAACCAAGAGATCAAATTTCGTGAGAGATTCGGAACAAATAAGAATCTTAGAGAGGGTCACATCGTCATCGAGTTTGATCATAGCTGTCCCTTTTTGCACAGCAACTAGTTCTTAGACTGCCGAGTCACCGGTAATGATAAAGATCAATCGGTTTGACATCAAGAAAGAAATCCAAAGAATTGAACATATGATGGCTTGCGCCTGAGT…	CP110454.1	Puccinia triticina	93.103	8656	0
TGCTGGACAAGAAAATCGGAGTAGAAATAATCAGTGATTTGGACACGAAGTAAGTGCAATGCGCAGGCGTGTAAGAGTTGCGAACCGGTAAATACTCTCTCAATTGCTTTGGCACAGTTTTAGGGTTCGCGGCTTCACCAGCTGTGATTGCAACCATTTCGGTGCCCATGTAGAGGTTGCTCGGAGAATACAGTCCTGCTCAGAAATTGTAATGAGTTCGTAAATTATTCACCCATGCGCAGCAAATCATTGAGCAGACTCACCAGCTAGGAACCTGCCCGGCAGCCACTTGGCATTTTGATGTAGTTGGTTAAATGGTCCGGGATCATGAAGTTACTAGATATAACAAAGGGTTTCGAATGAGATTGAGAGGGCGTTAATGACTGCTAACCAATCCCG…	CP110454.1	Puccinia triticina	92.884	1841	0
Positive hits in apple sample:
CAGCTCCCCGTCCAACCCCTCCTCTTCCCCACATTCGGACTGCAAGAATGATTAAAGTAAGAGCAACGGGCCAAACACCATAACCCAAAAACTCATCGCCGCCATCGTCAAGACTGCGGATCCCGAAGGAATTGTGCGAGTCGCGTTCGGCAAGGGCAAGGAAAGCGGATGCGTTAACAATCGGAGGGAGGGGCGGGAGAGCGAGGAGGTGGAGGTAGGTTTCGTTGTTGTTGTTGGAGACAGGAGGATGTGGCGTATGGTGTTGAATCTGGGACTAATTGGAGGACGACTCCATTCCGTCACTGCCATCGGTTGCGTCAAAGGTGAGACATATTTTGGAGGACGCGAGACTGTCGCTGAGAGGAGAAAGGAGGAGATAATCCGGGTTTGGAGATATGG…	CP042188.1	Venturia effusa	74.97	1002	2e-154
CATTGCTATCCATCTCTTGCTCTCGCAACCACGAACTGGTAAACAATTTCCAAATTTTCCTTCGCTTCAATTCGTTGCTCACCACAGACAGGAACTCACTTCGCCGCTAACCCTCTGTGCTGACAAGCCGAAGATGCAAGCTCCTCAACCTGGCCATGGTCGTAATGGCCTCACCCCTCATCAATGCCTTAGCCGACTCCAGATGGGCAAGTGACGGCAAAGACATGAAATCCAGCTTCCTTGAGTTCTCCAGTCAAGTCGCTCCTCATCGCTCGCCGACGATATCTGCATCGATTATTGCACTGGCTCAACTCGGTCCAAGAAGGCATTTGCCTCAAGAACCGATGCCGGCCAGCTGGTGACTGCGTCAACGTTAAAGCATTCTCTGTGACCAACTCT…	CP042194.1	Venturia effusa	71.66	162	7e-13
TGATGGGATGCATGCCTGCTTCGCCTTCCACGAGCCACGTCCGCCACCAGACTCTCTTTCTCCTTCCACTGTGGACACCTTGAGGCCCATCGAAACCATGCGAATGTGCTCTGAGTCCGACGTGTGCGTCGAACAAACGCTATACCCATTGTTTGTGTCATCTCGTTGTGTATCTTTCTGAACAAGCAGTATCCTTCTTTATTCAGCTCCGCAAACAATCTAACAACTAAATCCATTCCCGTCTTAGATGTGCAATCATGAATACTTCATCTCCTCACGCGAAGTAGCTTTCCAGACTACTACCGCTCCCATGGCATCAGCTCGAGACAGAGCTCGATGGGAAAGGATTCAAATTACTCCCAAGCAGTCTTCTCCACCCCCGCCCTGTCCAATGATGCG…	no significant similarity found
Positive hits in tomato sample:
TAACGAGAGTAAGCGCTTAGAATCCCCGATGGGAGCGCATGGCAAGCTGGCCAACAGGTGTCGACGCTGATATGTCCGGAGAGGTGTTTTTGGCCTCCCCGCACGTAAACTCTTTTGTCGCTACCAGGGCCTTGTGTTGGCGACAGCGATGTTGCGGCGATGCGGCTCTGCAGTGGTGGAGAGCTAGGTAGTGTGCTGAACGACGGCTCGGTACTGTGGCTGTCTCACACGATGTGAGGAAAGTGAATGCTTCCTATTTCACTGCTGGGAGTGGAACAGTGTTTGCGCGTACTGTAGTGGCTGGCGTTAGCGAAGAAAAGAAGCGCAGGAAAAAATTAGGTGAGTAGGATTCAAGGCGTGGTGGTGGAGGCAAGTGATGTATGTGGGCAGTGGTAGGTC…	CP123363.1	Alternaria alternata	97.222	1368	0
TGTTGGTTACTACCATTGCTAAAAGGCGAGCACAGCTGATCGTTCATATACAGAACACGTCCTACGCCCCTCGGTGATCGCTTCGGCGGATCTGTCTAGCAGAGCATCGAACAGAAGCGAACGTGTACCTACTCCGGCAGCTCTCGTTCCTTTCGGCCCTCAGAAGCGGCCATCGCCGACGCCGTCGATTAATGGCAAAGCAGAGAAACTTCTCAAAGAACACGGAAGTCCCCCTGGTATACGAGTTACCGCGGGTAAAAATATAGTTCCTAGCGACCTTCCACCGCTCGGCACGTCCCGATACGGCGACACCGCTTACAGACCACAACCACCACTGCGTGTCGCCCCAGGCAATATCCCTCAACCGCAGACACAAACAAACGGCAACAATACCGCTCG…	CP123363.1	Alternaria alternata	97.516	1248	0
